# Supplementary material
Source: PubMed Central journal article supplement (PMC5942905)
Supplement: NIHMS934046-supplement-Supp_AppendixS1.pdf [file NIHMS934046-supplement-Supp_AppendixS1.pdf]

Supplemental Information “Multiple Mortality Events in Bats: A Global Review”, *Mammal Review* 2016, O’Shea, Cryan, Hayman, Plowright, Streicker.

We provide summaries of pertinent details regarding multiple mortality events of bats in a series of nine appendices. Appendix S10 lists all references cited in Appendices S1-S9. Events are given by region alphabetically, then chronologically within regions. The number of events entered into tallies are given in parentheses under the “Description” column. We attempted to be conservative in designating numbers of events. Unfortunately not all sources provide enough information to allow accurate judgments in each case. Generally we considered events extending over multiple years as one event per year, and events observed at more than one dispersed location as separate events. We considered events impacting more than one species of bat as separate events for each species, unless there was insufficient information on numbers per species. Events with insufficient information for each species were treated as single events. Scientific names follow Simmons (2005) in Wilson and Reeder’s (2005) *Mammal Species of the World*, 3<sup>rd</sup> edition (<http://www.vertebrates.si.edu/msw/mswcfapp/msw/index.cfm>), with the exceptions of *Myotis escalerai* (Ibáñez *et al.* 2006), *Perimyotis subflavus*, and *Parastrellus hesperus* (Hooper *et al.* 2006).

Appendix S1. Reports of multiple bat deaths due to intentional killing by humans, including counts of dead bats taken for use as food.

| Region and Species    | Date         | Description                                                                                                                                                                                                          | Location                                  | Source              | Case |
|-----------------------|--------------|----------------------------------------------------------------------------------------------------------------------------------------------------------------------------------------------------------------------|-------------------------------------------|---------------------|------|
| <i>Africa</i>         |              |                                                                                                                                                                                                                      |                                           |                     |      |
| <i>Eidolon helvum</i> | Nov 1909     | “Large numbers” killed by local people. (1 event)                                                                                                                                                                    | Avakubi, Democratic Republic of the Congo | Lang & Chapin 1917b | S1-1 |
| <i>Eidolon helvum</i> | May-Jun 1914 | “Dozens of them were killed every day by natives with arrows and nooses.” (1 event)                                                                                                                                  | Medje, Democratic Republic of the Congo   | Lang & Chapin 1917b | S1-2 |
| Unspecified molossids | ca. 1914     | “Among the Mangbetu, the fat wrinkle-lipped bats (Molossidae) are often brought to the king as a special delicacy. Roasted and arrayed in rows of five and ten on a rod, they make a very welcome present” (1 event) | Democratic Republic of the Congo          | Lang & Chapin 1917a | S1-3 |

|                                                                 |                     |                                                                                                                                                                                                                               |                                                                                                     |                            |      |
|-----------------------------------------------------------------|---------------------|-------------------------------------------------------------------------------------------------------------------------------------------------------------------------------------------------------------------------------|-----------------------------------------------------------------------------------------------------|----------------------------|------|
| <i>Neoromicia nana</i>                                          | ca. 1914            | “It was in the hands of boys that we saw the first fifteen of these bats...they were all mutilated” (1 event)                                                                                                                 | Uele District, Democratic Republic of the Congo                                                     | Lang & Chapin 1917b        | S1-4 |
| <i>Eidolon helvum</i>                                           | Feb 1972            | 10 dead bats found on ground during weekend, killed during hunting for food, many more carcasses removed for consumption. (1 event)                                                                                           | University of Ife, Nigeria                                                                          | Halstead 1977              | S1-5 |
| <i>Eidolon helvum</i>                                           | Oct 1972 – Mar 1973 | 12,000 bats shot for nuisance control, and for market. (1 event)                                                                                                                                                              | University of Ife, Nigeria                                                                          | Halstead 1977              | S1-6 |
| <i>Hypsignathus monstrosus</i> ,<br><i>Epomops franqueti</i>    | April-May 2007      | During this period bats gather in migration and “hunters shoot them on a daily basis, a single shotgun cartridge killing up to several dozen animals.” (4 events, documented by authors but reported as an annual occurrence) | Ndongo and Koumulele Islands, Lulula River, Occidental Kasai Province, Democratic Republic of Congo | Leroy et al. 2009          | S1-7 |
| <i>Rousettus aegyptiacus</i>                                    | Aug 2008            | Thousands of dead bats were found piled in the forest, killed after deliberate exclusion and killing in nets at mine where people had contracted Marburg haemorrhagic fever. (1 event)                                        | Kitaka Mine, southern Uganda                                                                        | Amman et al. 2014          | S1-8 |
| <b>Asia</b>                                                     |                     |                                                                                                                                                                                                                               |                                                                                                     |                            |      |
| <i>Myotis emarginatus</i> ,<br><i>Rhinolophus ferrumequinum</i> | Unspecified         | Bats killed (“complete extermination”) during fumigation aimed at fruit bats ( <i>Rousettus aegyptiacus</i> ) as crop pests. (2 events)                                                                                       | Betan Aharon Nature Reserve, Israel                                                                 | Makin and Mendelssohn 1987 | S1-9 |

|                                                                                    |              |                                                                                                           |                                                 |                            |       |
|------------------------------------------------------------------------------------|--------------|-----------------------------------------------------------------------------------------------------------|-------------------------------------------------|----------------------------|-------|
| <i>Cheiromeles torquatus</i>                                                       | 1950s        | Killed by “sackfuls” for food. (1 event)                                                                  | Caves at Sarawak, Malaysia                      | Medway 1958                | S1-10 |
| <i>Rousettus leschenaultii</i> ,<br><i>Chaerephon plicatus</i> , and other species | 1960s        | Truckloads killed weekly to supply food markets. (2 events)                                               | Cave near Kanchanaburi, Thailand                | Stebbing 1987              | S1-11 |
| Multiple families of frugivores, nectarivores, and insectivores.                   | Ca. 1982     | Monthly catches by poachers market-hunting exceeded 10,000 bats. (1 event)                                | Khao Chong Pran Cave, Ratchaburi, Thailand      | Tuttle 1990                | S1-12 |
| <i>Pteropus vampyrus</i> , <i>P. hypomelanus</i>                                   | 1983-1984    | “hunter reported that thousands of bats were killed annually during the 1983 and 1984 seasons” (4 events) | Sabah, Malaysia                                 | Fujita & Tuttle 1991       | S1-13 |
| <i>Pteropus vampyrus</i>                                                           | 1980s        | “it is not uncommon for a group of hunters to bag several hundred in a single outing”. (1 event)          | Peninsular Malaysia                             | Fujita 1988                | S1-14 |
| <i>Chaerephon plicatus</i>                                                         | 1990s        | “Several thousand bats per day” extracted and sold at market. (1 event)                                   | Cave at Louang-Namtha, Lao PDR                  | Francis <i>et al.</i> 1999 | S1-15 |
| <i>Scotophilus kuhlii</i>                                                          | 1990s        | Boys killed 40 bats at emergence from tree roost in one night using slingshots. (1 event)                 | Savannakhet, Lao PDR                            | Francis <i>et al.</i> 1999 | S1-16 |
| <i>Chaerephon plicatus</i>                                                         | Apr/May 1999 | Thousands were smoked and sold after being killed and carried from cave in large sacks. (1 event)         | Ban Phoulan village near Louang-Namtha, Lao PDR | Francis <i>et al.</i> 1999 | S1-17 |
| <i>Eonycteris spelaea</i> , other species                                          | Ca. 2011     | > 1,000 left to die in nets set for orchard protection. (1 event)                                         | Thailand                                        | Anonymous 2012             | S1-19 |

|                                                                                               |                  |                                                                                                                                                                            |                                                           |                        |       |
|-----------------------------------------------------------------------------------------------|------------------|----------------------------------------------------------------------------------------------------------------------------------------------------------------------------|-----------------------------------------------------------|------------------------|-------|
| <i>Rousettus leschnaultii</i> ,<br><i>Hipposideros armiger</i>                                | Oct 2013         | 12,000 bats killed by smoke in cave. (2 events)                                                                                                                            | Near Mimi, Nagaland, India                                | Anonymous 2014         | S1-20 |
| <i>Rousettus leschnaultii</i> ,<br><i>Eonycteris spelaea</i> ,<br><i>Hipposideros armiger</i> | Oct 2014         | > 7,000 bats killed. Annual harvest has been ongoing for > 150 years according to oral history. (3 events)                                                                 | Near Mimi, Nagaland, India                                | Dovih 2015             | S1-21 |
| <b>Australia</b>                                                                              |                  |                                                                                                                                                                            |                                                           |                        |       |
| Multiple species                                                                              | 1800s to present | Explosions at day roosts (camps), shooting, and other methods, especially near orchards. Well-known records, including issuance of licenses and permits. (2 events)        | Australia                                                 | Hall and Richards 2000 | S1-22 |
| <i>Pteropus poliocephalus</i>                                                                 | 1890             | 200 killed by shooting. (1 event)                                                                                                                                          | Maclean, NSW Australia                                    | West 2002              | S1-23 |
| <i>Pteropus poliocephalus</i>                                                                 | 1950             | 2,000 killed by shooting. (1 event)                                                                                                                                        | Susan Island, Grafton, NSW, Australia                     | West 2002              | S1-24 |
| <i>Miniopterus schreibersii</i>                                                               | 1965             | Over 200 dead bats found in cave “assumed that humans were responsible as the bats had broken wings...as if they had been knocked from the roof and trodden on”. (1 event) | Fig Tree Cave, Wombeyan Caves, New South Wales, Australia | Dew 1965               | S1-25 |
| <i>Pteropus</i> sp.                                                                           | Jun 1984         | “Roosting area strewn with dead and dying bats” One person responsible admitted to legal                                                                                   | Queensland, Australia                                     | Pierson 1984           | S1-26 |

|                                                                                                                             |              |                                                                                                 |                                                              |                                                              |       |
|-----------------------------------------------------------------------------------------------------------------------------|--------------|-------------------------------------------------------------------------------------------------|--------------------------------------------------------------|--------------------------------------------------------------|-------|
|                                                                                                                             |              | killing as pests to fruit orchards. (1 event)                                                   |                                                              |                                                              |       |
| <i>Rhinolophus megaphyllus</i> ,<br><i>Taphozous georgianus</i>                                                             | Nov 1988     | Unspecified number of deaths from blasting for mine development. (2 events)                     | Speaking Tube and Elephant Hole Caves, Queensland, Australia | Anonymous 1989                                               | S1-27 |
| <i>Pteropus poliocephalus</i>                                                                                               | 1988-1993    | Entanglement in netting at fruit orchards (46). (1 event)                                       | Sydney, New South Wales, Australia                           | Tidemann 1999                                                | S1-28 |
| <i>Pteropus poliocephalus</i>                                                                                               | 1990         | Ca. 42 killed by illegal shooting. (1 event)                                                    | Maclean, NSW, Australia                                      | West 2002                                                    | S1-29 |
| <i>Pteropus poliocephalus</i>                                                                                               | Early 1990s  | 70,000 shot annually for orchard protection. (1 event)                                          | NSW Australia                                                | Vardon & Tidemann 1995 cited in McClelland <i>et al</i> 2011 | S1-30 |
| <i>Pteropus conspicillatus</i>                                                                                              | Nov-Dec 2000 | 1,510 deaths on electric grid in 4 nights. Estimated 21,000-23,000 killed in 8 weeks. (1 event) | North Queensland, Australia                                  | Martin 2011; Mellwee and Martin 2002                         | S1-31 |
| <i>Pteropus poliocephalus</i>                                                                                               | Spring 2013  | “Dozens” of young dead from stress of roost destruction. (1 event).                             | Perrin Park, Toowong, Queensland, Australia                  | Anonymous 2013                                               | S1-32 |
| <b>Europe</b>                                                                                                               |              |                                                                                                 |                                                              |                                                              |       |
| <i>Rhinolophus hipposideros</i> ,<br><i>Myotis myotis</i> ,<br><i>Nyctalus noctula</i> ,<br><i>Miniopterus schreibersii</i> | Unspecified  | Several colonies in buildings killed, some by children with air guns. (4 events)                | “Yugoslavia”                                                 | Stebbing 1988                                                | S1-33 |
|                                                                                                                             | 1920s-1940s  | Gassing of bats in church, ‘from the volume of dead bodies an                                   | Near Douglas, Isle of Man, U.K.                              | Stebbing 1988                                                | S1-34 |

|                                                        |          |                                                                                                                                      |                                |                     |       |
|--------------------------------------------------------|----------|--------------------------------------------------------------------------------------------------------------------------------------|--------------------------------|---------------------|-------|
| Likely <i>Myotis nattereri</i> , other vespertilionids |          | estimate suggests between 12,000 and 15,000 bats were killed. (2 events)                                                             |                                |                     |       |
| <i>Rousettus aegyptiacus</i>                           | 1933     | 5,859 bats killed for bounties for fruit depredation control in 1933, fewer (1,516 to 253 annually) documented 1934-1938. (6 events) | Cyprus                         | Hadjisterkotis 2006 | S1-45 |
| <i>Rousettus aegyptiacus</i>                           | 1955     | 1,100 bats killed for bounties for fruit depredation control. (1 event)                                                              | Cyprus                         | Hadjisterkotis 2006 | S1-48 |
| <i>Pipistrellus pipistrellus</i>                       | Aug 1964 | 74 bats that entered a room through an open window were gassed by an exterminator. (1 event)                                         | Nordrhein-Westfalen, Germany   | Roer 1981           | S1-35 |
| <i>Pipistrellus pipistrellus</i>                       | 1971     | 2,000 killed by direct insecticide fumigation. (1 event)                                                                             | Building at Dumfries, Scotland | Stebbing 1988       | S1-36 |
| <i>Rhinolophus ferrumequinum</i>                       | 1978     | 35 killed by explosive fireworks. (1 event)                                                                                          | Southwestern England           | Stebbing 1988       | S1-37 |
| <i>Myotis</i> sp.                                      | 1981     | 96 shot with pellets and set on fire. (1 event)                                                                                      | Eastern England                | Stebbing 1988       | S1-38 |
| <i>Pipistrellus pipistrellus</i>                       | 1985     | Several thousand bats gassed at private dwelling. (1 event)                                                                          | Norway                         | Stebbing 1988       | S1-39 |
| <i>Miniopterus schreibersii</i>                        | Ca. 1986 | Colony of 5,000 smoked out and killed by youths. (1 event)                                                                           | Martins Cave, Gibraltar        | Stebbing 1988       | S1-40 |
| <i>Miniopterus schreibersii</i>                        | 1986     | 600 bats killed by vandals. (1 event)                                                                                                | Cabrespine cave, Aude, France  | Stebbing 1988       | S1-41 |

|                                |               |                                                                                                                                                                                                      |                                |                                                    |       |
|--------------------------------|---------------|------------------------------------------------------------------------------------------------------------------------------------------------------------------------------------------------------|--------------------------------|----------------------------------------------------|-------|
| <i>Myotis blythii</i>          | 1987          | 100 hibernating bats deliberately killed by fire lit beneath them. (1 event)                                                                                                                         | Malta                          | Stebbing 1988                                      | S1-42 |
| <b>Islands</b>                 |               |                                                                                                                                                                                                      |                                |                                                    |       |
| <i>Pteropus tonganus</i>       | Prior to 1923 | Taken in nets from platforms high in roost trees. A night's catch "amounted to fifty, seventy, and even a hundred and fifty. An expert, Takopo of Alofi, caught two hundred in one night." (1 event) | Niue Island, South Pacific     | Loeb 1926                                          | S1-43 |
| Unspecified pteropodids        | 1931          | 50 or more bats killed per night by one hunter. (1 event)                                                                                                                                            | Northeast Sulawesi             | Heinrich 1943 cited in Bergmans and Rozendaal 1988 | S1-44 |
| <i>Pteropus mariannus</i>      | 1950s         | Seasonal harvest of bats in the hundreds at one village. (1 event)                                                                                                                                   | Yap, Western Caroline Islands  | Falanruw 1988                                      | S1-47 |
| <i>Brachyphylla cavernarum</i> | Dec 1955      | About 2,500 bats killed by gassing roost in building with motor vehicle exhaust. (1 event)                                                                                                           | St. Croix, U.S. Virgin Islands | Bond and Seaman 1958                               | S1-49 |
| <i>Brachyphylla cavernarum</i> | Dec 13, 1956  | Six wheel-barrow loads (about 2,000 bats) killed by gassing roost in building with motor vehicle exhaust. (1 event)                                                                                  | St. Croix, U.S. Virgin Islands | Bond and Seaman 1958                               | S1-50 |
| <i>Macrotus waterhousii</i>    | Nov 1965      | Counted 323 dead bats killed in a building. (1 event)                                                                                                                                                | Cienfuegos, Cuba               | Silva Taboada 1979                                 | S1-57 |
| <i>Aproteles bulmerae</i>      | 1970s         | On a single day hunters "fired a shotgun repeatedly into the mass of flying bats. Many hundreds were killed, and the people of                                                                       | New Guinea                     | Flannery 1994                                      | S1-58 |

|                                                                                                                                                           |               |                                                                                                                                        |                                          |                             |       |
|-----------------------------------------------------------------------------------------------------------------------------------------------------------|---------------|----------------------------------------------------------------------------------------------------------------------------------------|------------------------------------------|-----------------------------|-------|
|                                                                                                                                                           |               | nearby villages enjoyed an enormous feast.” (1 event)                                                                                  |                                          |                             |       |
| <i>Pteropus seychellensis</i>                                                                                                                             | 1977          | Up to 5 bats per day purchased by one restaurant. (1 event)                                                                            | Mahé, Seychelles                         | Racey 1979                  | S1-59 |
| <i>Pteropus mariannus</i>                                                                                                                                 | 1978-1981     | 2,961 to 7,238 bats exported to Guam as delicacy each year (in monthly totals). (4 events)                                             | Yap, Western Caroline Islands            | Falanruw 1988               | S1-60 |
| <i>Pteropus alecto</i>                                                                                                                                    | 15 Jan 1982   | 100 bats taken the previous night by hunters. (1 event)                                                                                | Bulukumba, Sulawesi, Indonesia           | Bergmans and Rozendaal 1988 | S1-61 |
| <i>Pteropus</i>                                                                                                                                           | Prior to 1984 | “Up to 100” are killed for ceremonies when pigs are scarce. (1 event)                                                                  | Vanuatu                                  | Chambers and Esrom 1991     | S1-62 |
| <i>Dobsonia moluccensis</i>                                                                                                                               | 1984-1987     | “Hundreds of animals are often captured, which must contribute considerably to the diet of the local people at such times”. (4 events) | Nong River valley, Papua New Guinea      | Flannery and Seri 1990      | S1-63 |
| <i>Pteropus giganteus</i>                                                                                                                                 | 1986-87       | Killed 295 bats in 10 nights of netting for fruit depredation control on 5 islands. (5 events)                                         | Maldives                                 | Dolbeer <i>et al.</i> 1988  | S1-64 |
| <i>Pteropus conspicillatus</i>                                                                                                                            | 1980s         | “large numbers are shot with air rifles for consumption”. (1 event)                                                                    | Bacan Islands, North Moluccas, Indonesia | Bergmans and Rozendaal 1988 | S1-65 |
| “Small bats” ( <i>Emballonura raffrayana</i> , <i>Mosia nigrescens</i> , <i>Hipposideros ater</i> , <i>Aselliscus tricuspis</i> , <i>Miniopterus</i> sp.) | 1995          | 1,000 taken each month as food. (5 events)                                                                                             | Makira, Solomon Islands                  | Richardson 1996             | S1-66 |



|                                                                                                                                                                          |               |                                                                                                      |                                                    |                              |       |
|--------------------------------------------------------------------------------------------------------------------------------------------------------------------------|---------------|------------------------------------------------------------------------------------------------------|----------------------------------------------------|------------------------------|-------|
| <i>Pteropus griseus</i><br>(1)<br><i>Pteropus pumilus</i><br>(25)<br><i>Pteropus hypomelanus</i> (6)<br><i>Acerodon humilus</i><br>(2)<br><i>Dobsonia viridis</i><br>(2) | 20 Apr 1999   | Bats taken for meals at small restaurant. (2 events)                                                 | Beo, Karakelang, Talaud Islands, Indonesia         | Riley 2002                   | S1-67 |
| <i>Pteropus sp.</i>                                                                                                                                                      | Dec 2001      | Small colony ca. 50 bats killed for food following typhoon. (1 event)                                | Vava'u, Tonga                                      | McConkey <i>et al.</i> 2004  | S1-68 |
| <i>Pteropus mariannus</i>                                                                                                                                                | 2002-2003     | Ca. 273 killed by poachers interviewed in 2002, 365 killed by hunters after 2003 typhoon. (2 events) | Rota, Commonwealth of the Northern Mariana Islands | Esselstyn <i>et al.</i> 2006 | S1-69 |
| <i>Miniopterus manavi</i><br><i>Myotis goudoti</i>                                                                                                                       | Prior to 2003 | Teenage boys harvest up to 100 bats per visit as food. (2 events)                                    | Midongy-Sud, Mount Papango, Madagascar             | Goodman <i>et al.</i> 2008   | S1-70 |
| <i>Pteropus vampyrus</i>                                                                                                                                                 | 2003          | 4,500 bats killed by hunters in one month. (1 event)                                                 | Kalimantan, Borneo                                 | Struebig <i>et al.</i> 2007  | S1-18 |
| <i>Hipposideros commersoni</i>                                                                                                                                           | 2004          | > 25 dead bats at roost. (1 event)                                                                   | Grotte d'Andrafiabe, Ankarana, northern Madagascar | Cardiff <i>et al.</i> 2009   | S1-71 |
| <i>Rousettus madagascariensis</i>                                                                                                                                        | 2004          | 90 dead bats at roost. (1 event)                                                                     | Grotte Milaintety, Ankarana, northern Madagascar   | Cardiff <i>et al.</i> 2009   | S1-72 |
| <i>Hipposideros commersoni</i> ,<br><i>Miniopterus gleni</i> ,                                                                                                           | 2005          | One hunter used a baton to kill 68 bats in two nights during 45-minute emergencies; estimated        | Grotte d'Androimpano, Mahafaly Plateau,            | Goodman 2006                 | S1-73 |

|                                                   |          |                                                                                                                                                                         |                                               |                                           |        |
|---------------------------------------------------|----------|-------------------------------------------------------------------------------------------------------------------------------------------------------------------------|-----------------------------------------------|-------------------------------------------|--------|
| <i>Triaenops rufus</i>                            |          | 2,700 <i>H. commersoni</i> killed in 3 month season. (3 events)                                                                                                         | southwestern Madagascar                       |                                           |        |
| <i>Mops midas</i>                                 | Mar 2005 | “a considerable number ... were tapped with branches as they exited a diurnal roost site, collected, and then the cooked cadavers were fed to domestic pigs.” (1 event) | Ambondromamy, Madagascar                      | Goodman <i>et al.</i> 2008                | S1-74  |
| <i>Rousettus madagascariensis</i>                 | 2006     | “Up to ten bats per night were killed during the fruiting season by the family to protect their fruits.” (1 event)                                                      | Anosibe An’ala, Toamasina, Madagascar         | Andrianaivoarivelo <i>et al.</i> 2007     | S1-75  |
| <i>Pteropus rufus</i>                             | 2006     | 100 bats taken in canopy nets by hunters each visit of 2- 3-night duration. (1 event)                                                                                   | Lac Kinkony-Mahavavy Area, Western Madagascar | Rakotoarivelo and Randrianandrianina 2007 | S1-76  |
| <i>Rousettus madagascariensis</i>                 | 2006     | 30-40 bats killed with sticks at cave in 1-hour weekly hunts during season. (1 event)                                                                                   | Ile Sainte-Marie, Madagascar                  | Rakotonandrasanand Goodman 2007           | S1-77  |
| <i>Pteropus dasymallus</i>                        | 2008     | About 100 bats killed in nets set for a two week period. (1 event)                                                                                                      | Yaeyama islands, Ryuku Archipelago, Japan     | Vincenot <i>et al.</i> 2015               | S1-135 |
| <i>Pteropus rufus</i><br><i>Eidolon dupreanus</i> | 2008     | Hunters killed about 19 bats per night in season. (2 events)                                                                                                            | Mahabo District, Madagascar                   | Randrianandrianina <i>et al.</i> 2010     | S1-78  |
| <i>Pteropus vampyrus</i>                          | 2011     | One hunter illegally killed 19 bats in one night, an example of much more intensive local hunting. (1 event)                                                            | Southern Luzon, Philippines                   | Scheffers <i>et al.</i> 2012              | S1-136 |
| <b><i>North America</i></b>                       |          |                                                                                                                                                                         |                                               |                                           |        |

|                                                               |             |                                                                                                                                                           |                                                 |                                |       |
|---------------------------------------------------------------|-------------|-----------------------------------------------------------------------------------------------------------------------------------------------------------|-------------------------------------------------|--------------------------------|-------|
| <i>Tadarida brasiliensis</i>                                  | 1908        | Destroyed “over two washtubfulls of the pesky critters”. (1 event)                                                                                        | Near San Antonio, Texas, USA                    | Campbell 1925                  | S1-79 |
| <i>Corynorhinus townsendii</i>                                | Ca. 1914    | Hundreds present until vandals set fires, these bats never found in the cave again. (1 event)                                                             | Cave near Portland, Oregon, USA                 | Bailey 1936, Perkins 1985      | S1-80 |
| <i>Eptesicus fuscus</i>                                       | 1940-1941   | “boys holding burning newspapers close to hibernating masses and burning them to death”. (1 event)                                                        | St. Peter, Minnesota, USA                       | Rysgaard 1942                  | S1-81 |
| <i>Myotis lucifugus</i>                                       | Ca. 1944    | “workmen had killed many bats by hosing the walls preparatory to reactivating the mine”. (1 event)                                                        | Craigmont Mine, Renfrew County, Ontario, Canada | Hitchcock 1965                 | S1-82 |
| <i>Desmodus rotundus</i> ; other non-target species in roosts | 1940s-1950s | Tens of thousands killed by flame throwers. (1 event)                                                                                                     | Mexico                                          | Brown 1994                     | S1-83 |
| <i>Desmodus rotundus</i>                                      | Unspecified | 698 bats killed in mist nets at two ranches May to Oct. (1 event)                                                                                         | Mexico                                          | Schmidt 1970 in Greenhall 1970 | S1-84 |
| <i>Desmodus rotundus</i>                                      | Unspecified | Over 500 bats killed in harp traps in “several evenings”. (1 event)                                                                                       | Mexico                                          | Greenhall 1970                 | S1-85 |
| <i>Myotis yumanensis</i>                                      | 1950        | Hundreds of dead bats found after the rooms of a hacienda were painted with DDT. [Unclear if painting was intentional to rid building of bats.] (1 event) | San Luis Potosi, Mexico                         | Dalquest 1953 in Clark 1981    | S1-86 |
| <i>Myotis grisescens</i>                                      | Ca. 1950s   | “...the owner of a commercialized cave personally described to me how he and his                                                                          | Tennessee, USA                                  | Tuttle 1979                    | S1-87 |

|                                                    |              |                                                                                                                                                                       |                                                 |                        |       |
|----------------------------------------------------|--------------|-----------------------------------------------------------------------------------------------------------------------------------------------------------------------|-------------------------------------------------|------------------------|-------|
|                                                    |              | assistants had killed bats with torches". (1 event)                                                                                                                   |                                                 |                        |       |
| Unidentified                                       | Ca. 1956     | 800 bats killed in "bat shoots" by Florida State Board of Health. (1 event)                                                                                           | Florida                                         | Rice 1957              | S1-88 |
| Unspecified                                        | Winter 1957  | "hundreds of bats were killed by being stoned from the low ceiling". (1 event)                                                                                        | Carter Caves State Park, Kentucky, USA          | Mohr 1972a             | S1-89 |
| Unspecified                                        | Dec 26, 1960 | Three boys killed an estimated 10,000 bats. (1 event)                                                                                                                 | Carter Caves State Park, Kentucky, USA          | Mohr 1972a             | S1-90 |
| <i>Myotis lucifugus</i> ,<br><i>Myotis sodalis</i> | Ca. 1960s    | Vandals killed about 100 hibernating bats with flames of torches. (2 events)                                                                                          | Ray's Cave, Greene County, Indiana, USA         | Humphrey and Cope 1976 | S1-91 |
| <i>Myotis sodalis</i> ,<br>others                  | Early 1960s  | At the entrance to a closed hibernaculum, "bats became torpid and were scraped off and carted out by the thousands in wheelbarrows. Most apparently died". (2 events) | Coach Cave, Kentucky, USA                       | Murphy 1993            | S1-92 |
| <i>Myotis sodalis</i>                              | 1961         | About 10,000 bats killed by vandals. (1 event)                                                                                                                        | Bat Cave, Carter County, Kentucky USA           | Humphrey 1978          | S1-93 |
| <i>Myotis lucifugus</i>                            | 1962-1963    | "many bats, including 146 banded ones, were removed...during an investigation of the incidence of rabies in bats". (1 event)                                          | Craigmont Mine, Renfrew County, Ontario, Canada | Hitchcock 1965         | S1-94 |
| <i>Eptesicus fuscus</i>                            | 1962-1963    | Mine use as hibernaculum declined steeply after fires set; Bats found dead or moribund killed by pellet shot and burning. (1 event)                                   | Abandoned mine near Leavenworth, Kansas, USA    | Phillips 1966          | S1-95 |

|                           |               |                                                                                                                              |                                     |                                       |        |
|---------------------------|---------------|------------------------------------------------------------------------------------------------------------------------------|-------------------------------------|---------------------------------------|--------|
| <i>Myotis lucifugus</i>   | 1963          | 1500 females and young exterminated. (1 event)                                                                               | Columbus, Indiana, USA              | Humphrey and Cope 1976, Humphrey 1964 | S1-96  |
| <i>Myotis grisescens</i>  | Ca. 1963-1971 | Hundreds of bats dead and dying from deliberate human attacks. (1 event)                                                     | Hubbard's Cave, Tennessee           | Tuttle 1985                           | S1-97  |
| <i>Myotis lucifugus</i>   | 1964          | Colony exterminated with DDT. (1 event)                                                                                      | Tipton, Indiana, USA                | Humphrey and Cope 1976, Humphrey 1964 | S1-98  |
| <i>Antrozous pallidus</i> | Nov 1964      | Found scorched carcasses, reported that about 200 had been "burned out" by ranch hands. (1 event)                            | May Cave, Barber County, Kansas USA | Jones <i>et al.</i> 1967              | S1-99  |
| <i>Myotis sodalis</i>     | 1965          | 140 bats intentionally blinded by cauterizing eyes, then released in homing experiment with no returns. (1 event)            | Kentucky, USA                       | Barbour <i>et al.</i> 1966            | S1-100 |
| <i>Myotis lucifugus</i>   | 1968          | Sprayed directly with DDT at roost building, 650 killed. (1 event)                                                           | Brookville Indiana USA              | Humphrey and Cope 1976                | S1-101 |
| <i>Myotis lucifugus</i>   | 1969          | Hundreds killed from deliberate spraying of colony with DDT and exposure to concentrated automobile exhaust fumes. (1 event) | Shoals. Indiana, USA                | Humphrey and Cope 1976                | S1-102 |
| <i>Myotis sodalis</i>     | 1970          | A "bushel basket full" of bats killed by vandals. (1 event)                                                                  | Little Mammoth Cave, Tennessee, USA | Humphrey 1978                         | S1-103 |
| <i>Myotis grisescens</i>  | Mar 1971      | Burning of construction debris killed thousands of bats. (1 event)                                                           | Marvel Cave, Missouri, USA          | Mohr 1972a                            | S1-104 |
| <i>Myotis grisescens</i>  | Ca. 1970-1976 | "...teenage boys who shot large numbers of bats at their roosts and during evening emergence. Many                           | Cave 20, Alabama or Tennessee, USA  | Tuttle 1979                           | S1-105 |

|                                                      |               |                                                                                                                                                    |                               |                                                       |        |
|------------------------------------------------------|---------------|----------------------------------------------------------------------------------------------------------------------------------------------------|-------------------------------|-------------------------------------------------------|--------|
|                                                      |               | spent cartridges in the cave verified the report". (1 event)                                                                                       |                               |                                                       |        |
| Unspecified                                          | Prior to 1972 | "Over the years, I have several times seen the floor of the mine...littered with hundreds of dead bats." Killed by vandals. (1 event)              | Hibernia, New Jersey, USA     | Mohr 1972a                                            | S1-106 |
| <i>Eptesicus fuscus</i>                              | 1972          | DDT used to exterminate bats in building. (1 event)                                                                                                | Blades, Delaware USA          | Mohr 1972b in Clark 1981                              | S1-107 |
| <i>Antrozous pallidus</i>                            | 1972          | Eighteen dead adult and young of year bats killed by vandals. (1 event)                                                                            | Verde Valley, Arizona, U.S.A. | O'Shea and Vaughan 1977                               | S1-108 |
| <i>Myotis lucifugus</i> ,<br><i>Eptesicus fuscus</i> | 1973-1975     | Hundreds of carcasses in barn after exterminators applied DDT and chlordane in 1973. Lethal concentrations found in brains. (2 events)             | Amherst, New Hampshire USA    | Clark <i>et al.</i> 1978a,<br>Kunz <i>et al.</i> 1977 | S1-109 |
| <i>Eptesicus fuscus</i>                              | 1978          | Treated two colonies in buildings with DDT in experimental extermination, 8 dead found, one colony "disappeared", one reduced in number. (1 event) | Ottawa, Ontario, Canada       | Barclay <i>et al.</i> 1980                            | S1-110 |
| <i>Desmodus rotundus</i>                             | 1980s         | Administration of anticoagulants to bat fur or systemically in cattle, shown to cause primarily species-specific vampire bat mortality. (1 event)  | Mexico through South America  | Arellano-Sota 1988,<br>Brown 1994                     | S1-111 |
| <i>Myotis sodalis</i> ,<br>others                    | Jan 1987      | "Heaps of bats were discovered on the cave floor, riddled with pellet holes or crushed." Criminal convictions resulted. (2 events)                 | Thornhill Cave, Kentucky, USA | Anonymous 1987,<br>Murphy 1987                        | S1-112 |

|                                                                                    |              |                                                                                                                                            |                                              |                              |        |
|------------------------------------------------------------------------------------|--------------|--------------------------------------------------------------------------------------------------------------------------------------------|----------------------------------------------|------------------------------|--------|
| <i>Eptesicus fuscus</i>                                                            | Summer 1990  | 19 dead adult females and young found beneath roost in bridge, shot and beaten by boys. (1 event)                                          | Near Tombstone, Cochise County, Arizona, USA | Sidner 1997                  | S1-113 |
| <i>Tadarida brasiliensis</i>                                                       | Jun 1991     | > 575 dead bats on the ground under roosting bridge with firearm shells littering the area. (1 event)                                      | Arizona, USA                                 | Anonymous 1991               | S1-114 |
| Multiple species of vespertilionid bats                                            | Ca. 1992     | “The floor was littered with recently killed and dying bats and empty hair spray cans, which had been lit and used as torches”. (2 events) | Michigan, USA                                | Tuttle 1993a                 | S1-115 |
| <i>Eptesicus fuscus</i> , <i>Antrozous pallidus</i> , <i>Tadarida brasiliensis</i> | Summer 1994  | 26 dead adults and young found beneath roost in bridge, killed by shotgun. (2 events)                                                      | Near Tombstone, Cochise County, Arizona, USA | Sidner 1997                  | S1-116 |
| <i>Myotis sodalis</i>                                                              | Oct 2007     | At least 105 beaten to death. Criminal convictions resulted. (1 event)                                                                     | Laurel Cave, Kentucky, USA                   | Anonymous 2010a              | S1-117 |
| <i>Lasiurus borealis</i>                                                           | Jul 2008     | 10 dead bats, trauma. (1 event)                                                                                                            | Elkton, Maryland, USA                        | U.S. Geological Survey 2015c | S1-118 |
| <i>Myotis lucifugus</i> , <i>Eptesicus fuscus</i>                                  | May-Sep 2009 | 12 dead bats, trauma. (1 event)                                                                                                            | New Hampshire, USA                           | U.S. Geological Survey 2015c | S1-119 |
| <i>Tadarida brasiliensis</i>                                                       | Jul-Aug 2009 | 300 dead bats, trauma. (1 event)                                                                                                           | Beaver County, Utah, USA                     | U.S. Geological Survey 2015c | S1-120 |
| <i>Tadarida brasiliensis</i>                                                       | Dec 2010     | 73 dead bats, gunshot. (1 event)                                                                                                           | Tucson, Arizona, USA                         | U.S. Geological Survey 2015c | S1-121 |
| <i>Antrozous pallidus</i>                                                          | Sep 2011     | 50 dead bats, trauma. (1 event)                                                                                                            | Yavapai County, Arizona                      | U.S. Geological Survey 2015c | S1-122 |

|                                                            |              |                                                                                                     |                                |                              |        |
|------------------------------------------------------------|--------------|-----------------------------------------------------------------------------------------------------|--------------------------------|------------------------------|--------|
| <i>Myotis yumanensis</i>                                   | Jun-Jul 2012 | 14 dead bats, trauma. (1 event)                                                                     | Skagit County, Washington, USA | U.S. Geological Survey 2015c | S1-123 |
| <i>Myotis austroriparius</i>                               | Jan 2013     | 41 bats dead, trauma. (1 event)                                                                     | Live Oak, Florida, USA         | U.S. Geological Survey 2015c | S1-124 |
| <i>Myotis lucifugus</i>                                    | Jul 2013     | 12 bats dead, suspected trauma. (1 event)                                                           | Clinton County, Iowa, USA      | U.S. Geological Survey 2015c | S1-125 |
| <i>Myotis lucifugus</i>                                    | Jul-Aug 2013 | 16 bats dead from trauma. (1 event)                                                                 | Thomson Illinois, USA          | U.S. Geological Survey 2015c | S1-126 |
| <i>Tadarida brasiliensis</i>                               | Jul 2013     | 24 bats dead from trauma. (1 event)                                                                 | Cary, North Carolina, USA      | U.S. Geological Survey 2015c | S1-127 |
| <i>Eptesicus fuscus</i>                                    | Jun 2014     | 15 dead bats, trauma. (1 event)                                                                     | Meshoppen, Pennsylvania, USA   | U.S. Geological Survey 2015c | S1-128 |
| <i>Eptesicus fuscus</i>                                    | Jul-Aug 2014 | 15 dead bats, trauma. (1 event)                                                                     | Shickshinny, Pennsylvania, USA | U.S. Geological Survey 2015c | S1-129 |
| <i>Tadarida brasiliensis</i>                               | Oct 2014     | Ca. 25 dead bats, trauma. (1 event)                                                                 | Tuscaloosa, Alabama, USA       | U.S. Geological Survey 2015b | S1-130 |
| <b>South America</b>                                       |              |                                                                                                     |                                |                              |        |
| <i>Desmodus rotundus</i> ; other species of bats in roosts | 1940s        | Extermination at many caves for rabies control using flamethrowers, poison gas, dynamite. (1 event) | Trinidad                       | Brown 1994                   | S1-46  |
| Unspecified                                                | Nov 1956     | Ten dead bats found on floor after attic sprayed with Malathion. (1 event)                          | Suriname                       | Husson 1962                  | S1-131 |
| <i>Molossus molossus</i><br><i>Molossus rufus</i>          | 1958-59      | Counted 1,931 dead bats after spraying of 15 houses with DDT, BHC, chlordane, dieldrin. (2 events)  | Trinidad                       | Greenhall and Stell 1960     | S1-51  |



|                                                               |                   |                                                                                                                                                             |               |                                                       |        |
|---------------------------------------------------------------|-------------------|-------------------------------------------------------------------------------------------------------------------------------------------------------------|---------------|-------------------------------------------------------|--------|
| <i>Desmodus rotundus</i>                                      | Nov 1959          | 12 bats killed after ingesting strychnine painted on cattle wounds. (1 event)                                                                               | Trinidad      | Greenhall 1963                                        | S1-52  |
| <i>Desmodus rotundus</i>                                      | Nov 1960          | 30 bats killed at a roost for rabies control. (1 event)                                                                                                     | Trinidad      | Greenhall 1963                                        | S1-53  |
| <i>Desmodus rotundus</i> ; other non-target species in roosts | 1950s-1960s       | Estimated 2,000 killed per year in control efforts. (~10 events)                                                                                            | Trinidad      | Greenhall 1970                                        | S1-56  |
| <i>Desmodus rotundus</i>                                      | Oct 1961          | 57 bats killed after capture in mist nets in 3 nights at a cow pasture. (1 event)                                                                           | Trinidad      | Greenhall 1963                                        | S1-54  |
| <i>Desmodus rotundus</i>                                      | Mar 1962          | 29 bats killed after capture in mist nets. (1 event)                                                                                                        | Trinidad      | Greenhall 1963                                        | S1-55  |
| <i>Desmodus rotundus</i> ; other non-target species in roosts | 1950s-1990s       | Thousands of caves pumped full with poisonous gas and dynamited; diesel fuel and toxaphene fires. (~10 events, but likely extending to thousands of events) | South America | Brown 1994, Arellano-Sota 1988                        | S1-132 |
| <i>Desmodus rotundus</i> ; other non-target species in roosts | 1960s             | Estimated 5,000 bats of several species killed when cave sprayed with aerosolized Newcastle's virus. (1 event)                                              | Colombia      | Brown 1994                                            | S1-133 |
| Multiple species in roosts in efforts to control vampire      | 1964 through 1966 | 900,000 bats per year destroyed through fumigation. (3 events, likely hundreds)                                                                             | Venezuela     | Dumith Arteaga <i>et al.</i> 1967 in Constantine 1970 | S1-134 |

|                                   |  |  |  |  |  |
|-----------------------------------|--|--|--|--|--|
| bats ( <i>Desmodus rotundus</i> ) |  |  |  |  |  |
|-----------------------------------|--|--|--|--|--|
