# Supplementary material
Source: PubMed Central journal article supplement (PMC5942905)
Supplement: NIHMS934046-supplement-Supp_AppendixS2.pdf [file NIHMS934046-supplement-Supp_AppendixS2.pdf]

Supplemental Information “Multiple Mortality Events in Bats: A Global Review”, *Mammal Review* 2016, O’Shea, Cryan, Hayman, Plowright, Streicker.

We provide summaries of pertinent details regarding multiple mortality events of bats in a series of nine appendices. Appendix S10 lists all references cited in Appendices S1-S9. Events are given by region alphabetically, then chronologically within regions. The number of events entered into tallies are given in parentheses under the “Description” column. We attempted to be conservative in designating numbers of events. Unfortunately not all sources provide enough information to allow accurate judgments in each case. Generally we considered events extending over multiple years as one event per year, and events observed at more than one dispersed location as separate events. We considered events impacting more than one species of bat as separate events for each species, unless there was insufficient information on numbers per species. Events with insufficient information for each species were treated as single events. Scientific names follow Simmons (2005) in Wilson and Reeder’s (2005) *Mammal Species of the World*, 3<sup>rd</sup> edition (<http://www.vertebrates.si.edu/msw/mswcfapp/msw/index.cfm>), with the exceptions of *Myotis escalerae* (Ibáñez *et al.* 2006), *Perimyotis subflavus*, and *Parastrellus hesperus* (Hooper *et al.* 2006).

**Appendix S2.** Reports of multiple bat deaths due to biotic factors other than infectious disease.

| Region and Species                                                                                                                            | Date          | Description                                                                                                                                                                   | Location                           | Source                   | Case |
|-----------------------------------------------------------------------------------------------------------------------------------------------|---------------|-------------------------------------------------------------------------------------------------------------------------------------------------------------------------------|------------------------------------|--------------------------|------|
| <i>Africa</i>                                                                                                                                 |               |                                                                                                                                                                               |                                    |                          |      |
| Unspecified bats                                                                                                                              | Prior to 1925 | Army ants attacking and killing young bats roosting in building roofs on multiple occasions. (1 event)                                                                        | Chikala Hills, Malawi              | Coudenhove 1925          | S2-1 |
| Thought to be:<br><i>Cloeotis percivali</i> ,<br><i>Rhinolophus simulator</i> ,<br><i>Hipposideros caffer</i> ,<br><i>Nycteris thebaica</i> , | 1973          | Bat hawk ( <i>Macheiramphus alcinus</i> ) observed on 6 nights captured 4-11 bats each night, one every 3 minutes; hawk averaged about 50% success on each attempt. (1 event) | Ngwerere Cave, near Lusaka, Zambia | Black <i>et al.</i> 1979 | S2-2 |

|                                                                                                                                                                                                                                                                                                                            |               |                                                                                                                                                                                                                                                       |                                                 |                           |      |
|----------------------------------------------------------------------------------------------------------------------------------------------------------------------------------------------------------------------------------------------------------------------------------------------------------------------------|---------------|-------------------------------------------------------------------------------------------------------------------------------------------------------------------------------------------------------------------------------------------------------|-------------------------------------------------|---------------------------|------|
| <i>Chaerephon</i> sp.,<br><i>Epomophorus</i> sp.,<br><i>Hipposideros caffer</i> ,<br><i>Laephotis angolensis</i> , <i>Myotis welwitschii</i> ,<br><i>Neorimicia</i> or <i>Pipistrellus</i> sp.,<br><i>Neoromicia capensis</i> ,<br><i>Nycticeinops schlieffeni</i> ,<br><i>Rhinolophus</i> sp.,<br><i>Scotophilus</i> sp., | 1976          | Remains of 65 bats in 28 pellets of Old World bat hawks. (1 event)                                                                                                                                                                                    | Sengwa Wild Life Research Area, Gokwe, Zimbabwe | Fenton <i>et al.</i> 1977 | S2-3 |
| <i>Chaerephon pumilus</i> ,<br><i>Mops condylurus</i>                                                                                                                                                                                                                                                                      | 3-16 Mar 1992 | 39 bats observed taken by four species of raptors. (1 event)                                                                                                                                                                                          | Kruger National Park, South Africa              | Fenton <i>et al.</i> 1994 | S2-4 |
| <i>Myotis myotis</i>                                                                                                                                                                                                                                                                                                       | 1993          | Snake ( <i>Coluber hippocrepis</i> ) ingested bat, witnesses noted at least 3 snakes regularly prey on bats at grille protecting cave. (1 event)                                                                                                      | Oujda Province, Morocco                         | Hammer & Arlettaz 1998    | S2-5 |
| <b>Asia</b>                                                                                                                                                                                                                                                                                                                |               |                                                                                                                                                                                                                                                       |                                                 |                           |      |
| Unspecified                                                                                                                                                                                                                                                                                                                | Ca. 1901-1911 | The Indian Hobby ( <i>Falco subbuteo centralasire</i> ) is “peculiarly fond of bats. I have seen sometimes below the nests of these birds such numerous remains of bats that they must in these instances have formed the staple food of both parents | India                                           | Baker 1917                | S2-6 |

|                                                                   |                      |                                                                                                                                                                                                                                           |                                                              |                                                     |       |
|-------------------------------------------------------------------|----------------------|-------------------------------------------------------------------------------------------------------------------------------------------------------------------------------------------------------------------------------------------|--------------------------------------------------------------|-----------------------------------------------------|-------|
|                                                                   |                      | and young.” Observed taking bats in moonlit sky. (1 event)                                                                                                                                                                                |                                                              |                                                     |       |
|                                                                   |                      |                                                                                                                                                                                                                                           |                                                              |                                                     |       |
| <b>Australia</b>                                                  |                      |                                                                                                                                                                                                                                           |                                                              |                                                     |       |
| <i>Miniopterus schreibersii</i> ,<br><i>Miniopterus australis</i> | Jul 1960-Sep<br>1962 | Fox ( <i>Vulpes vulpes</i> ) predation on at least 472 bats based on wing remains and feces. (3 events)                                                                                                                                   | Yessabah Bat Cave,<br>Kempsey, New South Wales,<br>Australia | Dwyer 1964                                          | S2-8  |
| <i>Pteropus poliocephalus</i>                                     | 1988-1993            | Corpses of 61 non-volant young fallen or abandoned at roosts. (1 event)                                                                                                                                                                   | Sydney, New South Wales,<br>Australia                        | Tidemann 1999                                       | S2-9  |
| <i>Pteropus conspicillatus</i>                                    | 1991                 | “scores of dead and dying flying foxes scattered on the forest floor. Infants were clinging to paralyzed mothers” 488 counted, ca 3,000 thought died subsequently. Tick paralysis neurotoxicity (fostered by ecosystem change). (1 event) | Atherton Tablelands,<br>North Queensland,<br>Australia       | Van Tassel 1995                                     | S2-10 |
| <i>Pteropus conspicillatus</i>                                    | 1998-2010            | About 200 to 680 bats per year died at three camps due to tick paralysis, primarily Oct-Dec. (> 13 events)                                                                                                                                | Atherton Tablelands,<br>Queensland,<br>Australia             | Buettner <i>et al.</i> 2013, Fox <i>et al.</i> 2008 | S2-11 |
| <i>Pteropus poliocephalus</i>                                     | Unspecified          | Large groups sometimes perish during periods of widespread or                                                                                                                                                                             | Unspecified,<br>Australia                                    | Tidemann 1999                                       | S2-12 |

|                                                                                                                                                                                                                                                                                                                                                                                                                                                               |                       |                                                                                                                                                                                                    |               |                          |       |
|---------------------------------------------------------------------------------------------------------------------------------------------------------------------------------------------------------------------------------------------------------------------------------------------------------------------------------------------------------------------------------------------------------------------------------------------------------------|-----------------------|----------------------------------------------------------------------------------------------------------------------------------------------------------------------------------------------------|---------------|--------------------------|-------|
|                                                                                                                                                                                                                                                                                                                                                                                                                                                               |                       | extended food shortages. (1 event)                                                                                                                                                                 |               |                          |       |
| <b>Europe</b>                                                                                                                                                                                                                                                                                                                                                                                                                                                 |                       |                                                                                                                                                                                                    |               |                          |       |
| <i>Barbastella barbastellus</i> ,<br><i>Eptesicus serotinus</i> ,<br><i>Rhinolophus ferrumequinum</i> ,<br><i>Rhinolophus hipposideros</i> ,<br><i>Myotis bechsteinii</i> ,<br><i>Myotis brandtii</i> ,<br><i>Myotis daubentonii</i> ,<br><i>Myotis mystacinus</i> ,<br><i>Myotis nattereri</i> ,<br><i>Nyctalus leisleri</i> ,<br><i>Nyctalus noctula</i> ,<br><i>Pipistrellus pipistrellus</i> ,<br><i>Plecotus auritus</i> ,<br><i>Plecotus austriacus</i> | 1968-1972,<br>1981-84 | Total impact on all species of bats by 15 species of birds estimated at 201,415 bats per year. (~9 events)                                                                                         | British Isles | Speakman 1991            | S2-13 |
| <i>Rhinolophus ferrumequinum</i> ,<br><i>Rhinolophus hipposideros</i> ,<br><i>Plecotus auritus</i>                                                                                                                                                                                                                                                                                                                                                            | Prior to 1988         | One house cat ate 22 bats in a few hours. (1 event)                                                                                                                                                | Europe or UK  | Stebbings 1988           | S2-14 |
| <i>Myotis daubentonii</i>                                                                                                                                                                                                                                                                                                                                                                                                                                     | Prior to 1988         | One domestic cat caught and killed over 70 bats within a few weeks. (1 event)                                                                                                                      | Europe or UK  | Stebbings 1988           | S2-15 |
| <i>Plecotus auritus</i> ,<br><i>Pipistrellus</i> spp.,<br>Unidentified species                                                                                                                                                                                                                                                                                                                                                                                | 1997 (summer)         | 30 cases of bats killed by domestic cats recorded in a survey of households with cats. Extrapolation from sample suggests about 170,000 bats could be killed by cats in Britain during summer. See | Britain       | Woods <i>et al.</i> 2003 | S2-16 |

|                              |                     |                                                                                                                                                                                                                                |                                             |                               |       |
|------------------------------|---------------------|--------------------------------------------------------------------------------------------------------------------------------------------------------------------------------------------------------------------------------|---------------------------------------------|-------------------------------|-------|
|                              |                     | reference for discussion of biases. (1 event)                                                                                                                                                                                  |                                             |                               |       |
| <i>Hypsugo savii</i>         | 2009 (summer)       | 1 cat killed 12 bats. (1 event)                                                                                                                                                                                                | Rome, Italy                                 | Ancillotto <i>et al.</i> 2013 | S2-67 |
| <i>Pipistrellus kuhlii</i>   | 2009-2011 (summers) | 1 cat killed 47 bats at a roost in 3 year period. (3 events)                                                                                                                                                                   | Cassino, Italy                              | Ancillotto <i>et al.</i> 2013 | S2-66 |
| <b>Islands</b>               |                     |                                                                                                                                                                                                                                |                                             |                               |       |
| <i>Phyllonycteris poeyi</i>  | 1954-1955           | Forty-one Cuban boas ( <i>Epicrates angulifer</i> ) collected stalking bats at cave entrance; three constricting or swallowing bats, digestive tracts of two others with three and nine bats each. (1 event)                   | Las Villas Province, Cuba                   | Hardy 1957                    | S2-17 |
| <i>Rhinolophus cornutus</i>  | 1967                | Remains of 11 bats in feces of weasels ( <i>Mustela sibirica</i> ). (1 event)                                                                                                                                                  | Komoriana Cave, Yamaguchi Prefecture, Japan | Kuramoto <i>et al.</i> 1969   | S2-7  |
| <i>Pteronotus quadridens</i> | 1981-1983           | 6-9 merlins ( <i>Falco columbanus</i> ) preyed on emerging bats each evening for six months each winter. At least 2.8 bats/day taken by each falcon, with most easily observed falcon taking 5.1 bats/day. Annual estimates of | Cucaracha Cave, Puerto Rico                 | Rodriguez-Duran & Lewis 1985  | S2-18 |

|                                                                                                                                                               |                |                                                                                                                                                                                                                                                                      |                                                               |                                |       |
|---------------------------------------------------------------------------------------------------------------------------------------------------------------|----------------|----------------------------------------------------------------------------------------------------------------------------------------------------------------------------------------------------------------------------------------------------------------------|---------------------------------------------------------------|--------------------------------|-------|
|                                                                                                                                                               |                | 3,100-4,700 bats taken each winter, about 1.5 % of estimated population in cave. (3 events)                                                                                                                                                                          |                                                               |                                |       |
| <i>Artibeus jamaicensis</i> ,<br><i>Ariteus flavescens</i> ,<br><i>Erophylla sezekorni</i> ,<br><i>Monophyllus redmani</i> ,<br><i>Eptesicus fuscus lynni</i> | 1985 and prior | Remains of 52 bats found in pellets of barn owls, <i>Tyto alba</i> (period of deposition unknown). (1 event)                                                                                                                                                         | Jackson's Bay,<br>Clarendon<br>Parish, Jamaica                | McFarlane &<br>Garret 1989     | S2-19 |
| <i>Pteropus sp.</i>                                                                                                                                           | 1986           | Remains of 11 fruit bats documented at a peregrine falcon ( <i>Falco peregrinus</i> ) eyrie in rain forest during "one collection period" of unspecified length. (1 event)                                                                                           | Fiji Islands                                                  | White <i>et al.</i><br>1988    | S2-20 |
| <i>Phyllonycteris poeyi</i> ,<br><i>Phyllops falcatus</i> ,<br><i>Artibeus jamaicensis</i>                                                                    | Mar 1994       | Remains of 21 individual bats found in regurgitated pellets of Stygian owls ( <i>Asio stygius</i> ). (1 event)                                                                                                                                                       | La Guira, Cuba                                                | Kirkconnell <i>et al.</i> 1999 | S2-22 |
| <i>Erophylla sezekorni</i> ,<br><i>Brachyphylla cavernarum</i>                                                                                                | 1994-1995      | From 4 to 21 Puerto Rican Boas ( <i>Epicrates inornatus</i> ) aggregated at caves with dense bat colonies, with 1-10 snakes at entrances; on one night 4 boas captured 7 bats. Timing of activity and prey selection indicated smaller bats were ignored. (2 events) | Cueva de los<br>Culebrones and<br>other caves,<br>Puerto Rico | Rodriguez-<br>Duran 1996       | S2-23 |

|                                                                                                                                                                    |               |                                                                                                                                                                                              |                                    |                                    |       |
|--------------------------------------------------------------------------------------------------------------------------------------------------------------------|---------------|----------------------------------------------------------------------------------------------------------------------------------------------------------------------------------------------|------------------------------------|------------------------------------|-------|
| <i>Brachyphylla cavernarum</i> ,<br><i>Erophylla bombifrons</i> ,<br><i>Mormoops blainvillei</i> ,<br><i>Monophyllus redmani</i> ,<br><i>Pteronotus quadridens</i> | 2006-2007     | Cats preyed each night on 5 of 6 species known to use the cave, not in proportion to abundance; 16 different cats observed. Remains of 161 bats examined, about half were adults. (5 events) | Culebrones Cave, Puerto Rico       | Rodriguez-Duran <i>et al.</i> 2010 | S2-24 |
| <i>Mystacina tuberculata</i>                                                                                                                                       | 2010          | One feral cat killed at least 102 bats at two roost trees in 7 days. (1 event)                                                                                                               | Central North Island, New Zealand  | Scrimgeour <i>et al.</i> 2012      | S2-25 |
| <b>North America</b>                                                                                                                                               |               |                                                                                                                                                                                              |                                    |                                    |       |
| <i>Myotis</i> sp.                                                                                                                                                  | 1892          | >12 bats (probably <i>M. lucifugus</i> , according to Lyon 1925) impaled on burrs on clump of burdock plants ( <i>Arctium</i> sp.). (1 event)                                                | Rock Island Arsenal, Illinois, USA | Lyon 1925                          | S2-26 |
| <i>Tadarida brasiliensis</i>                                                                                                                                       | Prior to 1925 | “Chicken snake” (probably <i>Pantherophis obsoleta</i> ) with 14 bats in gut. (1 event)                                                                                                      | Texas, USA                         | Campbell 1925                      | S2-27 |
| <i>Tadarida brasiliensis</i>                                                                                                                                       | 1938          | Six peregrine falcons ( <i>Falco peregrinus</i> ) observed preying on bats at evening emergence and morning returns to cave, predation said to take place daily for years. (1 event)         | Ney Cave, Medina County, Texas     | Stager 1941                        | S2-28 |
| <i>Tadarida brasiliensis</i>                                                                                                                                       | 1943          | Peregrine falcons ( <i>Falco peregrinus</i> ), American sparrow hawks ( <i>Falco sparverius</i> ), red-tailed hawks ( <i>Buteo</i>                                                           | Carlsbad Caverns, New Mexico       | Constantine 1948                   | S2-29 |

|                                                         |            |                                                                                                                                                                                       |                                            |                               |       |
|---------------------------------------------------------|------------|---------------------------------------------------------------------------------------------------------------------------------------------------------------------------------------|--------------------------------------------|-------------------------------|-------|
|                                                         |            | <i>jamaicensis</i> ), and Great horned owls ( <i>Bubo virginianus</i> ) observed killing and eating bats during exits and entrances at cave mouth. (1 event)                          |                                            |                               |       |
| <i>Eptesicus fuscus</i>                                 | 1949, 1950 | “considerable number” of bat skins and wings found under screech owl ( <i>Otus asio</i> ) roost at mouth of hibernaculum, owl also observed feeding on a bat. (2 events)              | St. Paul, Minnesota, USA                   | Beer 1953                     | S2-30 |
| <i>Myotis sp.</i>                                       | 1950       | Three mink ( <i>Mustela vison</i> ) captured at a hibernaculum with remains of “several” bats in their stomachs, thought to feed “heavily” upon hibernating bats in winter. (1 event) | Carter Caves, Carter County, Kentucky, USA | Goodpaster & Hoffmeister 1950 | S2-31 |
| <i>Tadarida brasiliensis</i>                            | 1950       | Numerous observations of peregrine falcons ( <i>Falco peregrinus</i> ) successfully attacking bats on the wing. (1 event)                                                             | Ney Cave, Medina County, Texas             | Sprunt 1951                   | S2-32 |
| <i>Myotis velifer</i> ,<br><i>Tadarida brasiliensis</i> | 1952       | Scat of a raccoon ( <i>Procyon lotor</i> ) with remains of 14 <i>M. velifer</i> , that of another full of <i>T. brasiliensis</i> hair. (1 event)                                      | Double Entrance S Cave, Kansas             | Twente 1955                   | S2-33 |



|                              |              |                                                                                                                                                                                                                                                |                                   |                         |       |
|------------------------------|--------------|------------------------------------------------------------------------------------------------------------------------------------------------------------------------------------------------------------------------------------------------|-----------------------------------|-------------------------|-------|
| <i>Tadarida brasiliensis</i> | 1953         | Six owl (probably <i>Tyto alba</i> ) pellets with remains of 11 bats. (1 event)                                                                                                                                                                | Woods County, Oklahoma            | Twente 1954             | S2-34 |
| <i>Myotis austroriparius</i> | 1953-1955    | Unidentified owl discarded wings of 42 bats eaten at cave entrance. (1 event)                                                                                                                                                                  | Florida                           | Rice 1957               | S2-35 |
| <i>Tadarida brasiliensis</i> | 1954         | Raccoon ( <i>Procyon lotor</i> ): accumulated fecal material with skins and bones of bats; some scats with remains of 5-10 bats each. Some may have been scavenged. (1 event)                                                                  | Bracken Cave, Texas, USA          | Eads <i>et al.</i> 1955 | S2-36 |
| <i>Tadarida brasiliensis</i> | Ca. 1956     | Eight species of raptors feeding on emerging or returning bats. Cooper's hawks ( <i>Accipiter cooperii</i> ), observed taking up to 6 bats/evening each. One great horned owl ( <i>Bubo virginianus</i> ) took 27 bats in one hour. (2 events) | Carlsbad Caverns, New Mexico, USA | Baker 1962              | S2-37 |
| <i>Tadarida brasiliensis</i> | Jul-Oct 1962 | Remains of 46 bats found in 23 great-horned owl ( <i>Bubo virginianus</i> ) pellets near a roost. (1 event)                                                                                                                                    | Greer County, Oklahoma, USA       | Taylor 1964             | S2-38 |
| <i>Tadarida brasiliensis</i> | 1963         | 21 banded volant young found as remains in 41 great horned                                                                                                                                                                                     | Major County, Oklahoma, USA       | Perry & Rogers 1964     | S2-39 |

|                              |               |                                                                                                                                       |                                |                       |       |
|------------------------------|---------------|---------------------------------------------------------------------------------------------------------------------------------------|--------------------------------|-----------------------|-------|
|                              |               | owl ( <i>Bubo virginianus</i> ) pellets at cave entrance. (1 event)                                                                   |                                |                       |       |
| <i>Eptesicus fuscus</i>      | 1965          | Long-tailed weasel ( <i>Mustela frenata</i> ) observed killing up to 14 adult and young bats at a nursery colony. (1 event)           | Hamilton County, Indiana       | Mumford 1969          | S2-40 |
| <i>Eptesicus fuscus</i>      | Ca. 1968-1970 | Barn owl ( <i>Bubo virginianus</i> ) pellets with remains of 27 bats (half were young of year), or 13.5 % of prey items. (1 event)    | Russel County, Kansas, U.S.A.  | Kunz 1974             | S2-41 |
| <i>Myotis lucifugus</i>      | Prior to 1969 | Domestic cat perched on roof at roost each evening capturing bats at emergence. (1 event)                                             | New York                       | Barbour & Davis 1969  | S2-42 |
| <i>Myotis grisescens</i>     | Jan 1970      | “discarded wings indicated that thousands more had fallen prey to opportunistic raccoons” (some could have been scavenged). (1 event) | Hubbard’s Cave, Tennessee, USA | Tuttle 1985           | S2-43 |
| <i>Antrozous pallidus</i>    | 1976          | Great horned owl ( <i>Bubo virginianus</i> ) pellets with 10 skulls of pallid bats, mostly young of the year. (1 event)               | Verde Valley, Arizona, USA     | O’Shea & Vaughan 1977 | S2-44 |
| <i>Tadarida brasiliensis</i> | 1976-1979     | Great horned owl pair ( <i>Bubo virginianus</i> ) roosted at cave                                                                     | Major County, Oklahoma, USA    | Caire & Ports 1981    | S2-45 |

|                                                                                             |           |                                                                                                                                                                         |                                               |                           |       |
|---------------------------------------------------------------------------------------------|-----------|-------------------------------------------------------------------------------------------------------------------------------------------------------------------------|-----------------------------------------------|---------------------------|-------|
|                                                                                             |           | entrance and often killed and ate emerging bats. (1 event)                                                                                                              |                                               |                           |       |
| <i>Parastrellus hesperus</i>                                                                | 1977-1978 | Bats made up half (56) of 112 non-insect prey of Mississippi kites ( <i>Ictinia mississippiensis</i> ), but 2% of total prey items. (2 events)                          | Near Gila River and tributaries, Arizona, USA | Glinski & Ohmart 1983     | S2-46 |
| <i>Myotis</i> sp.,<br><i>Lasiurus cinereus</i>                                              | Aug 1985  | Over 1,000 dead bats floating with dead ducks in pond with blue-green algal bloom (blue-green algae neurotoxin identified). (2 events)                                  | Steele Lake, Alberta, Canada                  | Pybus <i>et al.</i> 1986  | S2-47 |
| <i>Lasionycteris noctivagans</i> ,<br><i>Eptesicus fuscus</i> ,<br><i>Lasiurus borealis</i> | 1989      | Five peregrine falcons ( <i>Falco peregrinus</i> ) observed killing at least 28 bats on 3 mornings when migrating bats failed to reach shoreline before dawn. (1 event) | Lake Michigan, Illinois, USA                  | Byre 1990                 | S2-48 |
| <i>Tadarida brasiliensis</i>                                                                | Apr 1989  | One pair of burrowing owls ( <i>Athene cunicularia</i> ) observed for 2 weeks and 18 pellets collected had remains of 20 bats. (1 event)                                | Bakersfield, California, USA                  | Hoetker & Gobalet 1999    | S2-49 |
| <i>Artibeus jamaicensis</i> ,<br><i>Artibeus</i> sp.,<br>Unidentified bats                  | 1994-1995 | Twelve bats were 7% of 181 prey items of crane hawks ( <i>Geranospiza caerulescens</i> ). (1 event)                                                                     | Tikal National Park, Guatemala                | Sutter <i>et al.</i> 2001 | S2-50 |

|                                                            |              |                                                                                                                                                                                                                                          |                                            |                              |       |
|------------------------------------------------------------|--------------|------------------------------------------------------------------------------------------------------------------------------------------------------------------------------------------------------------------------------------------|--------------------------------------------|------------------------------|-------|
| <i>Tadarida brasiliensis</i>                               | Summer 1997  | Observed red-tailed hawks ( <i>Buteo jamaicensis</i> ) and peregrine falcons capture 237 bats entering or emerging from a large colony in a cave. Estimated that these predators killed >2,150 bats or <0.02 % of the colony. (2 events) | Frio Cave, Uvalde County, Texas            | Lee & Kuo 2001               | S2-51 |
| <i>Myotis lucifugus</i>                                    | May 2008     | 10 dead bats, predation and emaciation. (1 event)                                                                                                                                                                                        | Sargents Purchase, New Hampshire, USA      | U.S. Geological Survey 2015c | S2-52 |
| <i>Myotis lucifugus</i>                                    | Jun-Jul 2008 | 40 dead bats, emaciation: starvation suspect. (1 event)                                                                                                                                                                                  | Blue River, Wisconsin, USA                 | U.S. Geological Survey 2015c | S2-53 |
| <i>Myotis lucifugus</i>                                    | Jun-Jul 2010 | 30 dead bats, predation. (1 event)                                                                                                                                                                                                       | Jefferson County, Idaho, USA               | U.S. Geological Survey 2015c | S2-54 |
| <i>Eptesicus fuscus</i>                                    | Jun-Jul 2010 | 12 dead bats, predation. (1 event)                                                                                                                                                                                                       | Holcombe, Wisconsin, USA                   | U.S. Geological Survey 2015c | S2-55 |
| <i>Myotis septentrionalis</i> ,<br><i>Myotis lucifugus</i> | Jul 2010     | 12 carcasses, predation. (1 event)                                                                                                                                                                                                       | Cumberland Gap Historic Park, Virginia USA | U.S. Geological Survey 2015c | S2-56 |
| <i>Eptesicus fuscus</i>                                    | Jul 2011     | 12 dead, predation. (1 event)                                                                                                                                                                                                            | Four Mile Township, Iowa, USA              | U.S. Geological Survey 2015c | S2-57 |
| <i>Myotis ciliolabrum</i>                                  | Jul-Aug 2011 | 50 dead, starvation. (1 event)                                                                                                                                                                                                           | Ramon Cave, Idaho, USA                     | U.S. Geological Survey 2015c | S2-58 |
| <i>Corynorhinus townsendii</i>                             | Jun 2012     | 11 dead bats, emaciated, starvation suspected. (1 event)                                                                                                                                                                                 | Channel Islands National Park,             | U.S. Geological Survey 2015c | S2-59 |

|                                                                                                                                                                                                                                                                                                                                                                                                                                          |                   |                                                                                                                                          |                             |                              |       |
|------------------------------------------------------------------------------------------------------------------------------------------------------------------------------------------------------------------------------------------------------------------------------------------------------------------------------------------------------------------------------------------------------------------------------------------|-------------------|------------------------------------------------------------------------------------------------------------------------------------------|-----------------------------|------------------------------|-------|
|                                                                                                                                                                                                                                                                                                                                                                                                                                          |                   |                                                                                                                                          | California, USA             |                              |       |
| <i>Tadarida brasiliensis</i>                                                                                                                                                                                                                                                                                                                                                                                                             | Mar 2014          | 123 dead bats, emaciation, starvation suspected. (1 event)                                                                               | Milano, Texas, USA          | U.S. Geological Survey 2015c | S2-60 |
| <b>South America</b>                                                                                                                                                                                                                                                                                                                                                                                                                     |                   |                                                                                                                                          |                             |                              |       |
| Unspecified                                                                                                                                                                                                                                                                                                                                                                                                                              | 1960              | Daily observations of a peregrine falcon ( <i>Falco peregrinus</i> ) preying on bats emerging from a roost at dusk. (1 event)            | Rio De Janiero, Brazil      | Sick 1961                    | S2-61 |
| <i>Saccopteryx bilineata</i> ,<br><i>Phyllostomus discolor</i><br><i>Glossophaga soricina</i> ,<br><i>Carollia perspicillata</i> ,<br><i>Uroderma</i> sp.,<br><i>Chiroderma villosum</i> ,<br><i>Artibeus cinereus</i> ,<br><i>Artibeus jamaicensis</i> ,<br><i>Lasiurus borealis</i> ,<br><i>Lasiurus ega</i> ,<br><i>Eumops auripendulus</i> ,<br><i>Eumops glaucinus</i> ,<br><i>Molossus molossus</i> ,<br><i>Molossus pretiosus</i> | 1981              | Remains of 27 bats found in pellets of one pair of black and white owls ( <i>Ciccaba nigrolineata</i> ) monitored for 38 days. (1 event) | Portuguesa State, Venezuela | Ibanez <i>et al.</i> 1992    | S2-62 |
| Undetermined, suspect <i>Molossus</i> sp.                                                                                                                                                                                                                                                                                                                                                                                                | Jan-Mar 1981      | Observed a peregrine falcon take at least 19 bats at dusk on six nights and one dawn. (1 event)                                          | Paramaribo, Suriname        | Pierson & Donahue 1983       | S2-63 |
| <i>Glossophaga longirostris</i>                                                                                                                                                                                                                                                                                                                                                                                                          | Jun 1987-Jan 1988 | Eleven dead bats found in regurgitated barn owl ( <i>Tyto alba</i> ) pellets. (1 event)                                                  | Curacao                     | Debrot <i>et al.</i> 2001    | S2-21 |

|                                                                                                                                             |                       |                                                                                                                              |                    |                    |       |
|---------------------------------------------------------------------------------------------------------------------------------------------|-----------------------|------------------------------------------------------------------------------------------------------------------------------|--------------------|--------------------|-------|
| <i>Molossus molossus</i>                                                                                                                    | Feb-Jul 1994          | Pellets collected at roosts of a breeding pair of bat falcons ( <i>Falco rufigularis</i> ) had remains of 30 bats. (1 event) | Guanare, Venezuela |                    | S2-64 |
| <i>Sturnira</i> sp.,<br><i>Eptesicus</i> sp.,<br><i>Lasiurus</i> sp.,<br><i>Myotis</i> sp.,<br><i>Molossops</i> sp.,<br><i>Molossus</i> sp. | May 1998,<br>May 1999 | Observed remains of 444 bats in pellets at nest of barn owls. (5 events)                                                     | Beni, Bolivia      | Vargas et al. 2002 | S2-65 |
