# Supplementary material
Source: PubMed Central journal article supplement (PMC5942905)
Supplement: NIHMS934046-supplement-Supp_AppendixS3.pdf [file NIHMS934046-supplement-Supp_AppendixS3.pdf]

Supplemental Information “Multiple Mortality Events in Bats: A Global Review”, *Mammal Review* 2016, O’Shea, Cryan, Hayman, Plowright, Streicker.

We provide summaries of pertinent details regarding multiple mortality events of bats in a series of nine appendices. Appendix S10 lists all references cited in Appendices S1-S9. Events are given by region alphabetically, then chronologically within regions. The number of events entered into tallies are given in parentheses under the “Description” column. We attempted to be conservative in designating numbers of events. Unfortunately not all sources provide enough information to allow accurate judgments in each case. Generally we considered events extending over multiple years as one event per year, and events observed at more than one dispersed location as separate events. We considered events impacting more than one species of bat as separate events for each species, unless there was insufficient information on numbers per species. Events with insufficient information for each species were treated as single events. Scientific names follow Simmons (2005) in Wilson and Reeder’s (2005) *Mammal Species of the World*, 3<sup>rd</sup> edition (<http://www.vertebrates.si.edu/msw/mswcfapp/msw/index.cfm>), with the exceptions of *Myotis escalerai* (Ibáñez *et al.* 2006), *Perimyotis subflavus*, and *Parastrellus hesperus* (Hooper *et al.* 2006).

**Appendix S3.** Reports of multiple bat deaths due to natural abiotic factors.

| <b>Region and Species</b>        | <b>Date</b> | <b>Description</b>                                                                          | <b>Location</b>            | <b>Source</b>   | <b>Case</b> |
|----------------------------------|-------------|---------------------------------------------------------------------------------------------|----------------------------|-----------------|-------------|
| <i>Asia</i>                      |             |                                                                                             |                            |                 |             |
| Unidentified, presumed pteropids | May 2010    | > 400 bats dead below roost tree from heat wave with > 45 C ambient temperatures. (1 event) | Ahmedabad, Gujarat, India  | Anonymous 2010c | S3-1        |
| Unidentified, presumed pteropids | May 2010    | Ca. 300 bats dead below roost tree from heat wave. (1 event)                                | Panchmahal, Gujarat, India | Anonymous 2010c | S3-2        |

|                                    |             |                                                                                                          |                               |                 |      |
|------------------------------------|-------------|----------------------------------------------------------------------------------------------------------|-------------------------------|-----------------|------|
| Unidentified, presumed pteropodids | May 2010    | “Dozen” dead bats below roost tree in heat wave. (1 event)                                               | Sabarkantha, Gujarat, India   | Anonymous 2010c | S3-3 |
| Unidentified, presumed pteropodids | May 2015    | 50-60 dead bats found on ground and hanging from trees during heat wave. (1 event).                      | Korba, Chhattisgarh, India    | Droliya 2015    | S3-4 |
| Unidentified, presumed pteropodids | May 2015    | 100-200 dead bats beneath trees during heat wave. (1 event)                                              | Nalagonda, Telangana, India   | Qureshi 2015    | S3-5 |
| Pteropodids                        | 20 May 2015 | “Thousands” of bats drop to the ground dead during heat wave with > 45 C ambient temperatures. (1 event) | Bhopal, Madhya Pradesh, India | Anonymous 2015  | S3-6 |
| <i>Australia</i>                   |             |                                                                                                          |                               |                 |      |

|                               |                  |                                                                                                                                                                                                                                                                                                                                                                                                                                        |                                                                     |                                                                  |       |
|-------------------------------|------------------|----------------------------------------------------------------------------------------------------------------------------------------------------------------------------------------------------------------------------------------------------------------------------------------------------------------------------------------------------------------------------------------------------------------------------------------|---------------------------------------------------------------------|------------------------------------------------------------------|-------|
| <i>Pteropus</i> sp.           | Summer 1790-1791 | Unusually hot weather. “An immense flight of bats driven before the wind, covered all the trees around the settlement, whence they every moment dropped dead or in a dying state, unable longer to endure the burning state of the atmosphere” “immense numbers of the large fox bat were seen hanging at the boughs of trees, and dropping into the water...during the excessive heat many dropped dead while on the wing”. (1 event) | Sydney, New South Wales, Australia                                  | Tench (1793) & Collins (1798) cited in Gergis <i>et al.</i> 2009 | S3-7  |
| <i>Pteropus poliocephalus</i> | 1905             | Mortality of unspecified numbers due to abnormally high ambient temperatures. (1 event)                                                                                                                                                                                                                                                                                                                                                | Helidon, Queensland, Australia                                      | Ratcliffe 1932; Welbergen <i>et al.</i> 2008                     | S3-8  |
| <i>Pteropus poliocephalus</i> | 1913             | Mortality of unspecified numbers due to abnormally high ambient temperatures. (1 event)                                                                                                                                                                                                                                                                                                                                                | Malanganee, New South Wales, Australia                              | Ratcliffe 1932; Welbergen <i>et al.</i> 2008                     | S3-9  |
| <i>Pteropus scapulatus</i>    | 1926-1927        | Drought-induced migratory stress and starvation. (> 1 event)                                                                                                                                                                                                                                                                                                                                                                           | Queensland and New South Wales, Australia                           | Ratcliffe 1932                                                   | S3-10 |
| Unspecified                   | 1990             | High mortality during wet, windy, cold weather at the end of winter when food supply was low. Over a thousand deaths reported. (1 event)                                                                                                                                                                                                                                                                                               | Brisbane, Queensland, Australia                                     | Hall & Richards 2000                                             | S3-11 |
| Unspecified pteropodids       | 1991             | High mortality during wet, windy, cold weather at the end of winter when food supply was low. Numbers unspecified. (1 event)                                                                                                                                                                                                                                                                                                           | Northeastern New South Wales and southeastern Queensland, Australia | Hall & Richards 2000                                             | S3-12 |

|                                                           |                          |                                                                                                                                                      |                                                   |                                  |       |
|-----------------------------------------------------------|--------------------------|------------------------------------------------------------------------------------------------------------------------------------------------------|---------------------------------------------------|----------------------------------|-------|
| <i>Pteropus alecto</i> ,<br><i>Pteropus poliocephalus</i> | Jan 1994                 | Extremely hot weather (ambient > 44° C) resulted in deaths of > 1,000 bats. (2 events)                                                               | Townsville and Ipswich, Queensland, Australia     | Welbergen <i>et al.</i> 2008     | S3-13 |
| <i>Pteropus poliocephalus</i>                             | Dec 1994                 | Extremely hot weather (ambient > 43° C) resulted in deaths of 6,000 bats at two colonies. (2 events)                                                 | Cabramatta and Gordon, New South Wales, Australia | Welbergen <i>et al.</i> 2008     | S3-14 |
| <i>Pteropus poliocephalus</i>                             | 1998                     | Drought-caused native food shortage resulting in ca.136 deaths of rescued bats, primarily juveniles. (1 event)                                       | New South Wales, Australia                        | Markus & Hall 2004; Collins 1999 | S3-15 |
| <i>Pteropus poliocephalus</i>                             | Unspecified (late 1900s) | Unusually hot weather resulting in hyperthermia (29 bats). (1 event)                                                                                 | Northern Australia                                | Tidemann & Nelson 2011           | S3-16 |
| <i>Pteropus alecto</i> ,<br><i>Pteropus poliocephalus</i> | Jan 2000                 | Hot weather (ambient > 41° C) resulted in deaths of 500 bats. (2 events)                                                                             | Ipswich, Queensland, Australia                    | Welbergen <i>et al.</i> 2008     | S3-17 |
| <i>Pteropus poliocephalus</i>                             | 2000                     | > 2000 adults found dead in 3-week period Aug-September when winter drought reduced food availability. (1 event)                                     | Brisbane area, Queensland, Australia              | McIlwee & Martin 2002            | S3-18 |
| Unspecified pteropodids                                   | Unspecified              | Deaths in high air temperatures > 40° C and smoke and heat from bushfires. (1 event)                                                                 | Australia                                         | Hall & Richards 2000             | S3-19 |
| <i>Pteropus alecto</i> ,<br><i>Pteropus poliocephalus</i> | 12 Jan 2002              | Extremely hot weather (ambient > 42° C) resulted in deaths of > 3,679 bats (primarily <i>P. alecto</i> ) at nine observed roosting areas. (9 events) | New South Wales, Australia                        | Welbergen <i>et al.</i> 2008     | S3-20 |

|                                                           |                     |                                                                                                                 |                                                                            |                              |       |
|-----------------------------------------------------------|---------------------|-----------------------------------------------------------------------------------------------------------------|----------------------------------------------------------------------------|------------------------------|-------|
| <i>Pteropus poliocephalus</i>                             | Jan 2003            | Extremely hot weather (ambient > 44° C) resulted in deaths of 5,000 bats. (2 events)                            | Cabramatta and Gordon, New South Wales, Australia                          | Welbergen <i>et al.</i> 2008 | S3-21 |
| <i>Pteropus poliocephalus</i>                             | Jan 2004            | Extremely hot weather (ambient > 43° C) resulted in deaths of 3,000 to 8,000 bats. (1 event)                    | Bellingen, New South Wales, Australia                                      | Welbergen <i>et al.</i> 2008 | S3-22 |
| <i>Pteropus poliocephalus</i>                             | Dec 2004            | Extremely hot weather (ambient > 41° C) resulted in deaths of 1,000 to 5,000 bats at 2 colonies. (2 events)     | Coff's Harbour, New South Wales, Australia                                 | Welbergen <i>et al.</i> 2008 | S3-23 |
| <i>Pteropus alecto</i> ,<br><i>Pteropus poliocephalus</i> | Dec 2005            | Extremely hot weather (ambient > 41° C) resulted in deaths of 5,613 to 8,900 bats at 3 colonies. (3 events)     | Queensland, New South Wales, and Victoria, Australia                       | Welbergen <i>et al.</i> 2008 | S3-24 |
| <i>Pteropus poliocephalus</i>                             | Jan 2006            | Extremely hot weather (ambient > 42° C) resulted in deaths of 4,273 to 4,843 bats at 6 colonies. (6 events)     | New South Wales, and Victoria, Australia                                   | Welbergen <i>et al.</i> 2008 | S3-25 |
| <i>Pteropus poliocephalus</i>                             | Dec - Jan 2006-2007 | Extremely hot weather (ambient > 41° C) resulted in deaths of 207 bats at 2 colonies. (2 events)                | Melbourne, Victoria, Australia                                             | Welbergen <i>et al.</i> 2008 | S3-26 |
| <i>Miniopterus schreibersii</i>                           | Dec 2006            | Over 300 dead pups found, thought due to stress of cold temperatures and a preceding extreme drought. (1 event) | Bat Cave, Naracoorte Caves World Heritage Area, South Australia, Australia | Bourne & Hamilton-Smith 2007 | S3-27 |
| <i>Pteropus</i> sp.                                       | Winter 2007         | "Many" bats starving and dead, related to cold weather and drought. (1 event)                                   | Southeastern Queensland, Australia                                         | Bat Recovery Project (2007)  | S3-28 |

|                                                                                   |               |                                                                                                                                                                                     |                                                        |                                                                |       |
|-----------------------------------------------------------------------------------|---------------|-------------------------------------------------------------------------------------------------------------------------------------------------------------------------------------|--------------------------------------------------------|----------------------------------------------------------------|-------|
| <i>Pteropus sp.</i>                                                               | 2012          | “many hundreds of bats and other wildlife were killed or wounded” by a major hail storm. (1 event)                                                                                  | Mount Ommaney, Queensland, Australia                   | Wade 2012                                                      | S3-29 |
| <i>Pteropus poliocephalus</i> ,<br><i>Pteropus alecto</i> ,<br>others unspecified | Jan 2014      | At least 100,000 bats in more than 25 colonies died during record hot spell. (25 events)                                                                                            | Primarily Queensland, Australia                        | Murphy 2014,<br>Saunders 2014                                  | S3-30 |
| <i>Pteropus sp.</i>                                                               | Nov 2014      | Deaths of 5,000 bats at Casino and 2,000 bats at Richmond Valley reported during extreme hot spell. (2 events)                                                                      | Casino and Richmond Valley, New South Wales, Australia | Godfrey 2014                                                   | S3-31 |
| <b>Islands</b>                                                                    |               |                                                                                                                                                                                     |                                                        |                                                                |       |
| <i>Pteropus niger</i>                                                             | 1960          | Cyclone Carol appeared to reduce the population by an order of magnitude. (1 event)                                                                                                 | Reunion, Mauritius                                     | Cheke & Dahl 1981                                              | S3-32 |
| <i>Brachyphylla cavernarum</i>                                                    | Prior to 1977 | “During a year of severe drought, both infant and mother mortality was very high with some roosts being abandoned presumably due to the stench of dead and rotting bats.” (1 event) | St. Croix, U.S. Virgin Islands                         | Nellis & Ehle 1977                                             | S3-33 |
| <i>Pteropus seychellensis</i>                                                     | Apr 1977      | “Many” bats reportedly sucked up and burned in updraft of a vent on volcano. (1 event)                                                                                              | Grande Comore, Comoros Islands                         | Cheke & Dahl 1981                                              | S3-34 |
| <i>Pteropus rodricensis</i>                                                       | 1979          | Typhoon Celine II decreased numbers from 151 to 70. (1 event)                                                                                                                       | Rodriquez Island                                       | Cheke & Dahl 1981; Carroll 1984 cited in Pierson & Rainey 1992 | S3-35 |
| <i>Mormopterus acetabulosus</i>                                                   | 1980          | Cave flooded after Cyclone Hyacinthe, ca. 3,000 bats found dead on cave floor. (1 event)                                                                                            | Reunion, Mauritius                                     | Cheke & Dahl 1981                                              | S3-36 |
| <i>Pteropus rayneri</i><br><i>Pteropus tonganus</i>                               | 1986          | Cyclone Namu destroyed some forests, also stripped remaining                                                                                                                        | Malaita, Solomon Islands                               | Flannery 1989                                                  | S3-37 |

|                                                                                              |            |                                                                                                                                                                                                                                                                                                                    |                                           |                                                                                            |       |
|----------------------------------------------------------------------------------------------|------------|--------------------------------------------------------------------------------------------------------------------------------------------------------------------------------------------------------------------------------------------------------------------------------------------------------------------|-------------------------------------------|--------------------------------------------------------------------------------------------|-------|
|                                                                                              |            | trees of leaves and fruit, leading to starvation of “hundreds”. (2 events)                                                                                                                                                                                                                                         |                                           |                                                                                            |       |
| <i>Stenoderma rufum</i>                                                                      | 1989       | Hurricane Hugo in 1989 and Hurricane Georges in 1994 resulted in decreased abundance and reduced reproduction for several years afterward. No carcasses seen. (0 event)                                                                                                                                            | Luquillo Experimental Forest, Puerto Rico | Gannon & Willig 1994                                                                       | S3-38 |
| <i>Pteropus tonganus</i> ,<br><i>Pteropus samoensis</i>                                      | 1990, 1991 | Hurricane Ofa and Hurricane Val caused bat starvation, with “Hundreds, perhaps thousands” of flying foxes killed, many exposed and killed for recreation or food by local people. (4 events)                                                                                                                       | Tutuila, American Samoa                   | Daschback 1990; Craig & Syron, 1992; Craig <i>et al.</i> 1994; Pierson <i>et al.</i> 1996a | S3-39 |
| <i>Mormoops blainevillei</i> ,<br><i>Monophyllus redmani</i> ,<br><i>Erophylla sezekorni</i> | 1998       | Abnormally high number of skulls (56) found at Culebrones Cave along with declines in abundance after Hurricane Georges. (1 event)                                                                                                                                                                                 | Culebrones Cave, Puerto Rico              | Rodriguez-Duran 2009                                                                       | S3-40 |
| <i>Pteropus tonganus</i>                                                                     | 2001       | “Large numbers of flying foxes were seen floating in the water of a sheltered lagoon immediately after Cyclone Waka passed over (S. Campbell <i>pers. comm.</i> ), but dead bats were not reported from other areas until several weeks later.” Clarified as 40-50 dead bats by Wiles and Brooke (2009). (1 event) | Vava’u, Tonga                             | McConkey <i>et al.</i> 2004, Wiles & Brooke 2009                                           | S3-41 |
| <i>North America</i>                                                                         |            |                                                                                                                                                                                                                                                                                                                    |                                           |                                                                                            |       |

|                                                                                                                  |                         |                                                                                                                        |                                          |                                              |       |
|------------------------------------------------------------------------------------------------------------------|-------------------------|------------------------------------------------------------------------------------------------------------------------|------------------------------------------|----------------------------------------------|-------|
| <i>Tadarida brasiliensis</i>                                                                                     | Dec 29, 1930            | Forty or more bats frozen in unusual ice condition formed over a pond used for drinking. (1 event)                     | Mojave Desert, California, USA           | Campbell 1931                                | S3-42 |
| <i>Myotis lucifugus</i>                                                                                          | Oct 29, 1936            | Hundreds found dead or dying in the streets, thought to be due to exhaustion of migration during cold front. (1 event) | Black River Falls, Wisconsin, USA        | Zimmerman 1937                               | S3-43 |
| <i>Myotis sodalis</i>                                                                                            | Uncertain, perhaps 1937 | Estimated as many as 300,000 Indiana bats had died from a single flood based on deposition of bones. (1 event)         | Bat Cave, Edmonson County, Kentucky, USA | Hall 1962; U.S. Fish & Wildlife Service 2007 | S3-44 |
| <i>Eptesicus fuscus</i>                                                                                          | 11 Nov 1940             | >100 found dead in snow at entrance of hibernacula blocked by snow drifts following a severe winter storm. (1 event)   | Nicollet County, Minnesota, USA          | Rysgaard 1941, 1942                          | S3-45 |
| <i>Myotis lucifugus</i> ,<br><i>Myotis sodalis</i>                                                               | Nov 1950                | Flood drowned about 90% of hibernating colonies of 5,000 <i>M. lucifugus</i> and 500 <i>M. sodalis</i> . (2 events)    | Aitkin Cave, Pennsylvania                | Mohr 1972a, Griffin 1953                     | S3-46 |
| <i>Eptesicus fuscus</i> ,<br><i>Myotis lucifugus</i> ,<br><i>Myotis sodalis</i> ,<br><i>Perimyotis subflavus</i> | Mar 1964                | Severe flooding of cave used as a hibernaculum. (3 events)                                                             | Wind Cave, Kentucky, USA                 | DeBlase <i>et al.</i> 1965                   | S3-47 |
| <i>Tadarida brasiliensis</i>                                                                                     | Summer 1967             | “couldn’t see the surface of the guano for the carcasses of the bats” during drought. (1 event)                        | Carlsbad Caverns, New Mexico, USA        | Gosnell 1977                                 | S3-48 |
| <i>Myotis grisescens</i>                                                                                         | Jan 1970                | Some 10,000 bats lay dead, killed by flood. (1 event)                                                                  | Hubbard’s Cave, Tennessee, USA           | Tuttle 1985                                  | S3-49 |
| <i>Tadarida brasiliensis</i>                                                                                     | Prior to 1977           | “Several hundred bats dashed to the ground in one small area” due to a severe rainstorm. (1 event)                     | Carlsbad Caverns, New Mexico, USA        | Gosnell 1977                                 | S3-50 |



|                              |            |                                                                                                                                                         |                                            |                                                  |       |
|------------------------------|------------|---------------------------------------------------------------------------------------------------------------------------------------------------------|--------------------------------------------|--------------------------------------------------|-------|
| <i>Myotis sodalis</i>        | 1977       | Carcasses of 200 apparently frozen to death in hibernaculum. (1 event)                                                                                  | Twin Domes Cave, Harrison County, Indiana  | Richter et al. 1993                              | S3-51 |
| <i>Myotis sodalis</i>        | Late 1950s | "Numerous dead bats have been found under their roost in Bat Cave, Shannon Co., Missouri during or after unusually long, cold winter storms." (1 event) | Bat Cave, Shannon County, Missouri, USA    | Humphrey 1978, U.S. Fish & Wildlife Service 2007 | S3-52 |
| <i>Myotis sodalis</i>        | ca. 1986   | "large numbers of dead bats beneath hibernating clusters... apparently frozen to death as the result of particularly cold temperatures". (1 event)      | Bat Cave, Shannon County Missouri          | U.S. Fish & Wildlife Service 2007                | S3-53 |
| <i>Myotis austroriparius</i> | 1989       | 6,500 carcasses found awash at cave following flooding from a summer downpour. (1 event)                                                                | Florida, USA                               | Gore & Hovis 1994                                | S3-54 |
| <i>Myotis austroriparius</i> | 1990       | Flooding of cave by nearby river resulted in an estimated 50,000 deaths. (1 event)                                                                      | Apalachicola River, Florida, USA           | Gore & Hovis 1994                                | S3-55 |
| <i>Myotis austroriparius</i> | 1994       | Flooding at Snead's Cave, Florida reported to result in 85,000 deaths. (1 event)                                                                        | Snead's Cave, Jackson County, Florida, USA | Whitaker & Hamilton 1998                         | S3-56 |

|                                              |              |                                                                                                           |                                                                  |                              |       |
|----------------------------------------------|--------------|-----------------------------------------------------------------------------------------------------------|------------------------------------------------------------------|------------------------------|-------|
| <i>Myotis sodalis</i>                        | 1996         | Flooding apparent cause of several hundred carcasses found in fresh mud at lower level of cave. (1 event) | Batwing Cave, Crawford County, Indiana, USA                      | Brack et al. 2005            | S3-57 |
| <i>Myotis sp.</i>                            | Mar 1997     | Flooding of hibernaculum resulted in deaths of at least 10 bats. (1 event)                                | Binkley Cave, Harrison County, Indiana, USA                      | Brack et al. 2005            | S3-58 |
| <i>Myotis lucifugus</i>                      | Jun-Jul 2004 | 50 dead bats, emaciated: weather conditions suspect. (1 event)                                            | Winnebago County, Illinois, USA                                  | U.S. Geological Survey 2015c | S3-59 |
| <i>Eptesicus fuscus</i><br><i>Myotis sp.</i> | Jan 2005     | Flooding of hibernaculum resulted in deaths of at least 25 bats. (2 events)                               | Mitchell Crushed Stone Quarry Cave, Lawrence County, Indiana USA | Brack et al. 2005            | S3-60 |
| <i>Tadarida brasiliensis</i>                 | Jan 2011     | 600 dead bats, cold exposure suspected (1 event)                                                          | Travis County, Texas, USA                                        | U.S. Geological Survey 2015c | S3-61 |
