# Supplementary material
Source: PubMed Central journal article supplement (PMC5942905)
Supplement: NIHMS934046-supplement-Supp_AppendixS4.pdf [file NIHMS934046-supplement-Supp_AppendixS4.pdf]

Supplemental Information “Multiple Mortality Events in Bats: A Global Review”, *Mammal Review* 2016, O’Shea, Cryan, Hayman, Plowright, Streicker.

We provide summaries of pertinent details regarding multiple mortality events of bats in a series of nine appendices. Appendix S10 lists all references cited in Appendices S1-S9. Events are given by region alphabetically, then chronologically within regions. The number of events entered into tallies are given in parentheses under the “Description” column. We attempted to be conservative in designating numbers of events. Unfortunately not all sources provide enough information to allow accurate judgments in each case. Generally we considered events extending over multiple years as one event per year, and events observed at more than one dispersed location as separate events. We considered events impacting more than one species of bat as separate events for each species, unless there was insufficient information on numbers per species. Events with insufficient information for each species were treated as single events. Scientific names follow Simmons (2005) in Wilson and Reeder’s (2005) *Mammal Species of the World*, 3<sup>rd</sup> edition (<http://www.vertebrates.si.edu/msw/mswcfapp/msw/index.cfm>), with the exceptions of *Myotis escalerae* (Ibáñez *et al.* 2006), *Perimyotis subflavus*, and *Parastrellus hesperus* (Hooper *et al.* 2006).

**Appendix S4.** Reports of multiple bat deaths due to environmental contaminants, including pesticides.

| <b>Region and Species</b>                                                                 | <b>Date</b> | <b>Description</b>                                                                                                                                                                                                | <b>Location</b>                 | <b>Source</b>              | <b>Case</b> |
|-------------------------------------------------------------------------------------------|-------------|-------------------------------------------------------------------------------------------------------------------------------------------------------------------------------------------------------------------|---------------------------------|----------------------------|-------------|
| <i>Australia</i>                                                                          |             |                                                                                                                                                                                                                   |                                 |                            |             |
| <i>Pteropus alecto</i> ,<br><i>Pteropus poliocephalus</i> ,<br><i>Pteropus scapulatus</i> | 1980s       | Necropsies of bats and comparisons of lead concentrations in tissues with domestic animal toxicity suggest higher exposure in urban areas, with 11 of 37 bats presumed to have suffered lead poisoning. (1 event) | Brisbane, Queensland, Australia | Hariono <i>et al.</i> 1993 | S4-1        |
| <i>Europe</i>                                                                             |             |                                                                                                                                                                                                                   |                                 |                            |             |

|                                                                                                                   |               |                                                                                                                                                              |                               |                                                                      |      |
|-------------------------------------------------------------------------------------------------------------------|---------------|--------------------------------------------------------------------------------------------------------------------------------------------------------------|-------------------------------|----------------------------------------------------------------------|------|
| <i>Rhinolophus ferrumequinum</i>                                                                                  | unspecified   | Lindane used against wood boring beetles; “an estimated 15,000 bats were killed”. (1 event)                                                                  | Unspecified, Great Britain    | Stebbings 1988                                                       | S4-2 |
| <i>Rhinolophus ferrumequinum</i>                                                                                  | 1952          | Over 100 found dead following chemical treatment of timbers for wood-boring insect control at a roost. (1 event)                                             | England                       | Stebbings 1971 cited in Braaksma & van der Drift 1972, Braaksma 1973 | S4-3 |
| <i>Rhinolophus ferrumequinum</i>                                                                                  | 1953          | Lindane used against wood boring beetles. Many thousands killed, estimates based on seven wheelbarrow loads of carcasses. (1 event)                          | Dorset, England               | Stebbings & Arnold 1987, Stebbings 1987                              | S4-4 |
| <i>Plecotus auritus</i>                                                                                           | Ca. 1962-1972 | Ca. 300 bats found dead in church lofts treated with remedial pesticides. (1 event)                                                                          | The Netherlands               | Braaksma 1973                                                        | S4-5 |
| <i>Eptesicus serotinus</i>                                                                                        | 1964          | 14 bats found dead in church loft after wood treated with lindane, lindane present in tissues. (1 event)                                                     | Zuid-Holland, The Netherlands | Braaksma 1973                                                        | S4-6 |
| <i>Eptesicus serotinus</i> ,<br><i>Plecotus auritus</i> ,<br><i>Myotis dasycneme</i> ,<br><i>Pipistrellus</i> sp. | 1963-1969     | 78 dead bats of four species were found dead at 6 roosts in buildings soon after chemical treatment of timbers for wood-boring insects and decay. (5 events) | The Netherlands               | Braaksma & van der Drift 1972                                        | S4-7 |

|                                                                                                                                                                                                                           |            |                                                                                                                                                                                                                                                                       |                                     |                                    |       |
|---------------------------------------------------------------------------------------------------------------------------------------------------------------------------------------------------------------------------|------------|-----------------------------------------------------------------------------------------------------------------------------------------------------------------------------------------------------------------------------------------------------------------------|-------------------------------------|------------------------------------|-------|
| <i>Myotis dasycneme</i>                                                                                                                                                                                                   | 1973, 1977 | 137 dead bats counted in a church treated with lindane and DDT. (2 events)                                                                                                                                                                                            | Berlikum, The Netherlands           | Voûte 1980                         | S4-8  |
| <i>Myotis dasycneme</i>                                                                                                                                                                                                   | 1974-1981  | Annual juvenile mortality 20% in 1974 to 77% in 1977 (ca. 40-100 deaths) following treatment of timbers with DDT, lindane, PCP. Deaths coincident with treatment, and high residues in carcasses. Decomposition prevented confirmatory analysis of brains. (5 events) | Church at Berlikum, The Netherlands | Leeuwangh & Voûte 1985; Voûte 1981 | S4-9  |
| <i>Rhinolophus ferrumequinum</i> ,<br><i>Pipistrellus pipistrellus</i> ,<br><i>Plecotus auritus</i> ,<br><i>Myotis brandtii</i> ,<br><i>Myotis daubentonii</i> ,<br><i>Myotis mystacinus</i> ,<br><i>Myotis nattereri</i> | 1982-1987  | Details 23 case incidents of multiple bats found dead after treatment of timbers in roosts in Britain, primarily with dieldrin or lindane. (6 events, numbers of carcasses not specified in every case).                                                              | Britain                             | Mitchell-Jones <i>et al.</i> 1989  | S4-10 |
| <i>Rhinolophus ferrumequinum</i>                                                                                                                                                                                          | Pre-1986   | Colony of 1,500 killed by application of dieldrin as wood preservative (no diagnostic chemical residue data provided). (1 event)                                                                                                                                      | Unspecified, Great Britain          | Stebbing & Griffith 1986           | S4-11 |

|                                  |              |                                                                                                                                                                                                                                                           |                                    |                           |       |
|----------------------------------|--------------|-----------------------------------------------------------------------------------------------------------------------------------------------------------------------------------------------------------------------------------------------------------|------------------------------------|---------------------------|-------|
| <i>Rhinolophus ferrumequinum</i> | 1999-2001    | 40, 78, and 51 carcasses of juveniles found in summer. Suggested to be due to lead and pentachlorophenol poisoning based on various laboratory findings, but no diagnostic data provided. (3 events)                                                      | Trévarez Castle, Finistère, France | Gremillet & Boireau 2004  | S4-12 |
| <b>Islands</b>                   |              |                                                                                                                                                                                                                                                           |                                    |                           |       |
| <i>Mystacina tuberculata</i>     | Jan-Feb 2009 | 115 deaths due to secondary poisoning by rodenticide diphacinone (1 event)                                                                                                                                                                                | Pureora Forest Park, New Zealand   | Dennis & Gartrell 2015    | S4-13 |
| <b>North America</b>             |              |                                                                                                                                                                                                                                                           |                                    |                           |       |
| <i>Myotis grisescens</i>         | Summer 1976  | 39 dead juveniles; brains of most dead juveniles analysed had lethal dieldrin concentrations. (2 events)                                                                                                                                                  | Two caves in Missouri, USA         | Clark <i>et al.</i> 1978b | S4-14 |
| <i>Myotis sodalis</i>            | 1976         | Brains of dead bats with lethal concentrations of dieldrin, suspected lethal mix of dieldrin and heptachlor at two roosts; guano beneath another roost with concentrations of dieldrin indicative of lethality (carcass numbers not estimated). (1 event) | Caves in Missouri and Indiana, USA | O'Shea & Clark 2002       | S4-15 |

|                          |             |                                                                                                                                     |                                                  |                           |       |
|--------------------------|-------------|-------------------------------------------------------------------------------------------------------------------------------------|--------------------------------------------------|---------------------------|-------|
| <i>Myotis grisescens</i> | Summer 1977 | 74 dead bats; brains of analysed subsample all had lethal dieldrin concentrations. (1 event)                                        | Cave in Franklin County, Missouri, USA           | Clark <i>et al.</i> 1980  | S4-16 |
| <i>Myotis grisescens</i> | Jul 1978    | 103 dead bats; analysed subsample with lethal dieldrin concentrations. (1 event)                                                    | Cave in Franklin County, Missouri, USA           | Clark <i>et al.</i> 1983b | S4-17 |
| <i>Myotis grisescens</i> | Jul 1980    | 18 dead bats; analysed subset had residues of dieldrin diagnostic of lethal exposure, plus heptachlor, endrin. (1 event)            | Hunter Cave, Boone County, Missouri, USA         | Clark <i>et al.</i> 1983a | S4-18 |
| <i>Myotis grisescens</i> | 1980-1981   | 49 dead bats in a colony of 500; analysed subset had residues of dieldrin diagnostic of lethal exposure, plus heptachlor. (1 event) | Devil's Icebox Cave, Boone County, Missouri, USA | Clark <i>et al.</i> 1983a | S4-19 |
| <i>Myotis grisescens</i> | 1982        | Total carcasses not estimated; lethal levels of dieldrin verified in brains of 2 dead bats. (1 event)                               | Holton Cave, Boone County, Missouri, USA         | Clawson & Clark 1989      | S4-20 |
| <i>Myotis grisescens</i> | 1986        | "More than 1,000, perhaps several times more"; DDD and endrin or metabolite concentrations suggestive of organochlorine             | Cave Springs Cave, Alabama, USA                  | Clark <i>et al.</i> 1988  | S4-21 |

|                         |               |                                                                                                                                        |                                       |                              |       |
|-------------------------|---------------|----------------------------------------------------------------------------------------------------------------------------------------|---------------------------------------|------------------------------|-------|
|                         |               | poisoning in some bats analysed; bacteriological, virological, and histopathological analyses showed no evidence of disease. (1 event) |                                       |                              |       |
| Unspecified             | Prior to 1987 | “many dead passerines and bats in oil pits of southeastern New Mexico”. (1 event)                                                      | Southeastern New Mexico, USA          | Flickinger & Bunck 1987      | S4-22 |
| Unspecified             | Jul-Sep 1987  | 32 carcasses in cyanide ponds of gold mining operation. (1 event)                                                                      | Coeur-Rochester mine, Nevada, USA     | Clark & Hothem 1991          | S4-23 |
| Unspecified             | Oct-Dec 1988  | 12 carcasses in cyanide ponds of gold mining operation. (1 event)                                                                      | Green Springs mine, Nevada, USA       | Clark & Hothem 1991          | S4-24 |
| Unspecified             | Aug-Oct 1988  | 51 carcasses in cyanide ponds of gold mining operation. (1 event)                                                                      | Cyprus Copperstone Mine, Arizona, USA | Clark & Hothem 1991          | S4-25 |
| <i>Myotis lucifugus</i> | July 2009     | 30 dead bats, carbamate poisoning. (1 event)                                                                                           | Valley County, Idaho, USA             | U.S. Geological Survey 2015c | S4-26 |
