# Supplementary material
Source: PubMed Central journal article supplement (PMC5942905)
Supplement: NIHMS934046-supplement-Supp_AppendixS5.pdf [file NIHMS934046-supplement-Supp_AppendixS5.pdf]

Supplemental Information “Multiple Mortality Events in Bats: A Global Review”, *Mammal Review* 2016, O’Shea, Cryan, Hayman, Plowright, Streicker.

We provide summaries of pertinent details regarding multiple mortality events of bats in a series of nine appendices. Appendix S10 lists all references cited in Appendices S1-S9. Events are given by region alphabetically, then chronologically within regions. The number of events entered into tallies are given in parentheses under the “Description” column. We attempted to be conservative in designating numbers of events. Unfortunately not all sources provide enough information to allow accurate judgments in each case. Generally we considered events extending over multiple years as one event per year, and events observed at more than one dispersed location as separate events. We considered events impacting more than one species of bat as separate events for each species, unless there was insufficient information on numbers per species. Events with insufficient information for each species were treated as single events. Scientific names follow Simmons (2005) in Wilson and Reeder’s (2005) *Mammal Species of the World*, 3<sup>rd</sup> edition (<http://www.vertebrates.si.edu/msw/mswcfapp/msw/index.cfm>), with the exceptions of *Myotis escalerae* (Ibáñez *et al.* 2006), *Perimyotis subflavus*, and *Parastrellus hesperus* (Hooper *et al.* 2006).

**Appendix S5.** Reports of multiple bat deaths due to accidents other than collisions with wind turbines.

| Region and Species            | Date                     | Description                                                                            | Location                           | Source                 | Case |
|-------------------------------|--------------------------|----------------------------------------------------------------------------------------|------------------------------------|------------------------|------|
| <b><i>Africa</i></b>          |                          |                                                                                        |                                    |                        |      |
| <i>Eidolon helvum</i>         | Nov 1962                 | 12 bats killed/maimed when a branch of the roost tree snapped in high winds. (1 event) | Kampala, Uganda                    | Ogilvie & Ogilvie 1964 | S5-1 |
| <b><i>Australia</i></b>       |                          |                                                                                        |                                    |                        |      |
| <i>Pteropus poliocephalus</i> | 1988-1993                | Electrocution on power lines (155 bats over 5 years). (5 events)                       | Sydney, New South Wales, Australia | Tidemann 1999          | S5-2 |
| <i>Pteropus poliocephalus</i> | Unspecified (late 1900s) | Electrocution on power lines (16 bats). (1 event)                                      | Northern Australia                 | Tidemann & Nelson 2011 | S5-3 |

|                                                                                                                                                 |                         |                                                                                                            |                                 |                                        |       |
|-------------------------------------------------------------------------------------------------------------------------------------------------|-------------------------|------------------------------------------------------------------------------------------------------------|---------------------------------|----------------------------------------|-------|
| Unspecified                                                                                                                                     | Unspecified (2002-2011) | One airstrike involving more than 10 bats reported. (1 event)                                              | Australia                       | Australian Transport Safety Board 2012 | S5-4  |
| <i>Pteropus</i> sp.                                                                                                                             | 2009 or 2010            | 19 bats electrocuted on power lines. (1 event)                                                             | Brisbane, Queensland, Australia | Anonymous (2010b)                      | S5-5  |
| <b>Europe</b>                                                                                                                                   |                         |                                                                                                            |                                 |                                        |       |
| <i>Pipistrellus pipistrellus</i>                                                                                                                | Aug-Sep 1973            | Found 82 dead bats trapped in a structure of a hospital where they could not find a way out. (1 event)     | Nordrhein-Westfalen, Germany    | Roer 1981                              | S5-6  |
| <i>Pipistrellus pipistrellus</i>                                                                                                                | Aug 1977                | Found 10 dead bats of 80 trapped in an apartment. (1 event)                                                | Nordrhein-Westfalen, Germany    | Roer 1981                              | S5-7  |
| <i>Pipistrellus pipistrellus</i>                                                                                                                | Oct 1979                | Entrapment in exhaust pipe of hospital, found 475 decomposing bats and 735 skeletons. (1 event)            | Nordrhein-Westfalen, Germany    | Roer 1980, 1981                        | S5-8  |
| <i>Pipistrellus pipistrellus</i>                                                                                                                | Jun 1985                | Roost destruction: 70 bats found dying after building with roost demolished. (1 event)                     | Langen, Germany                 | Disser & Nagel 1989                    | S5-9  |
| <i>Rhinolophus hipposideros</i> , <i>Myotis daubentonii</i> , <i>Pipistrellus pipistrellus</i> , <i>Hypsugo savii</i> , <i>Plecotus auritus</i> | 1989                    | Counted 72 dead bats of five species on 17-km section of roadway following the Mino River, searched weekly | Orense, Spain                   | Gonzalez-Prieto <i>et al.</i> 1993     | S5-10 |

|                                                                                                                                                                                                                                                                                              |              |                                                                                                                                          |                                              |                    |       |
|----------------------------------------------------------------------------------------------------------------------------------------------------------------------------------------------------------------------------------------------------------------------------------------------|--------------|------------------------------------------------------------------------------------------------------------------------------------------|----------------------------------------------|--------------------|-------|
|                                                                                                                                                                                                                                                                                              |              | (deaths primarily in warm season). (1 event)                                                                                             |                                              |                    |       |
| <i>Rhinolophus hipposideros, Myotis myotis, Myotis nattereri, Myotis mystacinus, Myotis brandtii, Myotis dasycneme, Myotis daubentonii, Eptesicus serotinus, Pipistrellus nathusii, Nyctalus noctula, Nyctalus leisleri, Plecotus auritus, Plecotus austriacus, Barbastella barbastellus</i> | 1992-2004    | Reported 167 dead bats of 14 species, primarily in a survey of an 8-km section of highway weekly in summer season, 1994-2000. (7 events) | Near Warsaw, Poland                          | Lesiński 2007      | S5-11 |
| <i>Tadarida teniotis</i>                                                                                                                                                                                                                                                                     | Oct 1995     | > 100 dead bats found entrapped in flower boxes in high rise building. (1 event)                                                         | Valencia, Spain                              | Monsalve-Dolz 2014 | S5-12 |
| <i>Tadarida teniotis</i>                                                                                                                                                                                                                                                                     | Oct 1996     | > 100 dead bats found entrapped in flower boxes in high rise building. (1 event)                                                         | Valencia, Spain                              | Monsalve-Dolz 2014 | S5-13 |
| <i>Pipistrellus kuhlii, P. pipistrellus, Plecotus austriacus</i>                                                                                                                                                                                                                             | Jul-Aug 1997 | Found 30 dead bats in 4 surveys along a 7-km length of highway. (2 events)                                                               | Rennes-Lorient highway N24, Brittany, France | Choquene 2006      | S5-14 |
| <i>Myotis daubentonii, Pipistrellus kuhlii,</i>                                                                                                                                                                                                                                              | Aug 1998     | Found 12 dead bats on a survey of a                                                                                                      | Highway N24 Mordelles, France                | Choquene 2006      | S5-15 |

|                                                                                                                                                                                                                                                                                                                                                                                  |                              |                                                                                                                                                                   |                                                  |                     |       |
|----------------------------------------------------------------------------------------------------------------------------------------------------------------------------------------------------------------------------------------------------------------------------------------------------------------------------------------------------------------------------------|------------------------------|-------------------------------------------------------------------------------------------------------------------------------------------------------------------|--------------------------------------------------|---------------------|-------|
| <i>P. pipistrellus</i><br><i>Plecotus auritus</i> ,                                                                                                                                                                                                                                                                                                                              |                              | section of highway of unspecified length. (1 event)                                                                                                               |                                                  |                     |       |
| <i>Barbastella barbastellus</i> ,<br><i>Eptesicus serotinus</i> ,<br><i>Myotis daubentonii</i> ,<br><i>Myotis mystacinus</i> ,<br><i>Pipistrellus kuhlii</i> ,<br><i>P. pipistrellus</i><br><i>Plecotus auritus</i> ,<br><i>Plecotus austriacus</i><br><i>Rhinolophus ferrumequinum</i>                                                                                          | Jul-Aug 1998, 1999           | Found 56 dead bats in 3 surveys in 1998 and 1 in 1999 along a 36-km length of highway (4 events)                                                                  | Rennes-Lorient highway N24, Brittany, France     | Choquene 2006       | S5-16 |
| <i>Myotis nattereri</i> ,<br><i>Myotis mystacinus</i> ,<br><i>Myotis myotis</i> ,<br><i>Myotis daubentonii</i> ,<br><i>Myotis emarginatus</i> ,<br><i>Myotis bechsteinii</i> ,<br><i>Pipistrellus kuhlii</i> ,<br><i>P. pipistrellus</i> ,<br><i>Plecotus auritus</i> ,<br><i>Plecotus austriacus</i> ,<br><i>Rhinolophus ferrumequinum</i> ,<br><i>Barbastella barbastellus</i> | May-Oct each year, 1998-2002 | Total of 104 bats of 12 species found dead along a 2-km length of highway near a hibernation site, surveyed weekly (17-41 dead bats found each summer) (4 events) | Near Bourges, Region Centre-Val de Loire, France | Capo et al. 2006    | S5-17 |
| <i>Tadarida teniotis</i>                                                                                                                                                                                                                                                                                                                                                         | Nov 2002                     | 28 bats died after being stranded on a                                                                                                                            | Thessaloniki, Greece                             | Kalpakis et al 2005 | S5-35 |

|                                                                                                                                                                                                                                                                                     |                                     |                                                                                                   |                                    |                           |       |
|-------------------------------------------------------------------------------------------------------------------------------------------------------------------------------------------------------------------------------------------------------------------------------------|-------------------------------------|---------------------------------------------------------------------------------------------------|------------------------------------|---------------------------|-------|
|                                                                                                                                                                                                                                                                                     |                                     | building balcony. (1 event)                                                                       |                                    |                           |       |
| <i>Nyctalus noctula</i>                                                                                                                                                                                                                                                             | Unspecified (between 2002 and 2009) | 25 adults trapped in drain pipe in month of December. (1 event)                                   | Germany                            | Mühldorfer et al. 2011    | S5-36 |
| <i>Nyctalus noctula</i>                                                                                                                                                                                                                                                             | Unspecified (between 2002 and 2009) | 21 dead adults from destruction of a tree with a nursery colony. (1 event)                        | Germany                            | Mühldorfer et al. 2011    | S5-37 |
| <i>Miniopterus schreibersii</i><br><i>Myotis daubentonii</i><br><i>Myotis emarginatus</i><br><i>Pipistrellus pipistrellus</i><br><i>Rhinolophus euryale</i><br><i>Rhinolophus ferrumequinum</i><br><i>Rhinolophus hipposideros</i>                                                  | Feb-Sep 2003                        | Found 44 dead bats in surveys of a 40 km section of highway A20. (3 events)                       | Cahors, Lot, France                | Néri 2006                 | S5-18 |
| <i>Myotis brandtii</i> ,<br><i>M. alcaethoe</i> ,<br><i>M. emarginatus</i> ,<br><i>M. nattereri</i> ,<br><i>M. daubentonii</i> ,<br><i>Eptesicus serotinus</i> ,<br><i>Nyctalus noctula</i> ,<br><i>N. leisleri</i> ,<br><i>Pipistrellus pipistrellus</i> ,<br><i>P. pygmaeus</i> , | May-Oct 2007                        | 119 dead bats of up to 12 species found in weekly surveys of 8.0 total km of two roads. (1 event) | Pohoelice to Perna, Czech Republic | Gaisler <i>et al</i> 2009 | S5-19 |

|                                                                                                                                                                                                                                                                                                                                                                                   |              |                                                                                                                                                    |                                |                            |       |
|-----------------------------------------------------------------------------------------------------------------------------------------------------------------------------------------------------------------------------------------------------------------------------------------------------------------------------------------------------------------------------------|--------------|----------------------------------------------------------------------------------------------------------------------------------------------------|--------------------------------|----------------------------|-------|
| <i>P. nathusii</i>                                                                                                                                                                                                                                                                                                                                                                |              |                                                                                                                                                    |                                |                            |       |
| <i>Myotis nattereri</i> ,<br><i>Eptesicus serotinus</i> ,<br><i>Pipistrellus nathusii</i> ,<br><i>Nyctalus noctula</i> ,<br><i>Nyctalus leisleri</i> ,<br><i>Plecotus auritus</i> ,<br><i>Barbastella barbastellus</i>                                                                                                                                                            | 2008         | Counted 61 dead bats of seven species on weekly counts of a 16.6-km section of roadway through a national park near Warsaw April to Oct. (1 event) | Kampinos National Park, Poland | Lesinski <i>et al</i> 2011 | S5-20 |
| <i>Rhinolophus ferrumequinum</i> ,<br><i>Rhinolophus hipposideros</i> ,<br><i>Myotis daubentonii</i> ,<br><i>Myotis escalerai</i> ,<br><i>Nyctalus leisleri</i> ,<br><i>Eptesicus serotinus</i> ,<br><i>Pipistrellus kuhlii</i> ,<br><i>Pipistrellus pipistrellus</i> ,<br><i>Pipistrellus pygmaeus</i> ,<br><i>Miniopterus schreibersii</i> ,<br><i>Barbastella barbastellus</i> | Mar-Oct 2009 | Found 154 dead bats of 11 species in daily driving surveys of a 51-km transect of different road types. (1 event)                                  | Southern Portugal              | Medinas <i>et al.</i> 2013 | S5-21 |
| <b>Islands</b>                                                                                                                                                                                                                                                                                                                                                                    |              |                                                                                                                                                    |                                |                            |       |
| <i>Pteropus seychellensis</i>                                                                                                                                                                                                                                                                                                                                                     | 1984         | Estimated 10 bats killed by electrocution on power lines. (1 event)                                                                                | Mahe, Seychelles               | Verschuren 1985            | S5-22 |
| <b>North America</b>                                                                                                                                                                                                                                                                                                                                                              |              |                                                                                                                                                    |                                |                            |       |

|                           |               |                                                                                                                                                                         |                                                             |               |       |
|---------------------------|---------------|-------------------------------------------------------------------------------------------------------------------------------------------------------------------------|-------------------------------------------------------------|---------------|-------|
| <i>Myotis sodalis</i>     | Prior to 1882 | A solid wood door built to control access to an internal passage resulted in bats flying “against it with such force as to kill themselves in large numbers.” (1 event) | Wyandotte Cave, Indiana                                     | Hovey 1882    | S5-23 |
| <i>Lasiurus borealis</i>  | Prior to 1906 | Entrapment in cave. Remains of 203 bats found. (1 event)                                                                                                                | Donaldson Cave, Mitchell, Indiana, USA                      | Hahn 1907     | S5-24 |
| <i>Antrozous pallidus</i> | 1924          | ‘The bodies of several dozen were found in a water tank ... where in drinking from the surface... had fallen in and drowned’ (1 event)                                  | Slaughter Canyon, Carlsbad Cavern National Park, New Mexico | Bailey 1928   | S5-25 |
| <i>Lasiurus borealis</i>  | 1940          | 15 bats heavily mired in oil on a 500 foot section of newly oiled roadway. Hypothesized that bats mistook oil for water and attempted to drink. (1 event)               | Piper City, Illinois, USA                                   | Koestner 1942 | S5-26 |

|                              |                          |                                                                                                                                                                                           |                                               |                |       |
|------------------------------|--------------------------|-------------------------------------------------------------------------------------------------------------------------------------------------------------------------------------------|-----------------------------------------------|----------------|-------|
| <i>Lasiurus borealis</i>     | 1954-1958                | Entrapment in large caves. Remains of 1,630 bats found deep inside of 10 of 109 searched caves, a few alive but weak. Most in summer. Some tested for rabies, found negative. (10 events) | Caves in Missouri, USA                        | Myers 1960     | S5-27 |
| <i>Lasiurus cinereus</i>     | 1954-1958                | Entrapment in large caves. Remains of 23 bats found far inside 4 of 109 searched caves, a few alive but weak. Most in summer. (1 event)                                                   | Caves in Missouri, USA                        | Myers 1960     | S5-28 |
| <i>Tadarida brasiliensis</i> | Spring-early summer 1959 | Sampled fallen carcasses and estimated 13,000 immature young die in falls from ceiling of cave with ca. 1 million adult females. (1 event)                                                | Davis Blowout Cave, Blanco County, Texas, USA | Herreid 1967   | S5-29 |
| <i>Myotis lucifugus</i>      | 1961                     | A large jar under a leak in an attic had a "mass of dead little brown bats" (estimated at 350 by Barbour and Davis, 1969) that had fallen                                                 | Salisbury, Vermont, U.S.A.                    | Hitchcock 1963 | S5-30 |



|                                                    |                                   |                                                                                                                                                                                                                                          |                                               |                               |       |
|----------------------------------------------------|-----------------------------------|------------------------------------------------------------------------------------------------------------------------------------------------------------------------------------------------------------------------------------------|-----------------------------------------------|-------------------------------|-------|
|                                                    |                                   | in and died entrapped.<br>(1 event)                                                                                                                                                                                                      |                                               |                               |       |
| <i>Myotis austroriparius</i>                       | Spring-early summer<br>1971, 1972 | Counted 82 fallen<br>immature carcasses in<br>1971 and 188 in 1972<br>in roost in chimney of<br>house. (2 events)                                                                                                                        | Micanopy, Alachua<br>County, Florida USA      | Foster <i>et al.</i> 1978     | S5-31 |
| <i>Myotis grisescens</i>                           | 30 Jun 1981                       | Counted 32 dead<br>fallen young in<br>stream below nursery<br>roost. (1 event)                                                                                                                                                           | Cave in Jessamine<br>County, Kentucky,<br>USA | MacGregor &<br>Westerman 1982 | S5-32 |
| <i>Myotis austroriparius</i>                       | Spring-early summer<br>1983       | Counted 95 fallen<br>immature carcasses<br>below roost in attic.<br>(1 event)                                                                                                                                                            | Williston, Levy<br>County, Florida            | Hermanson &<br>Wilkins 1986   | S5-33 |
| <i>Myotis lucifugus</i> ,<br><i>Myotis sodalis</i> | 2001                              | Reported 27 <i>M.</i><br><i>lucifugus</i> and 1 <i>M.</i><br><i>sodalis</i> killed by<br>motor vehicles during<br>36 days in summer<br>2001, primarily near a<br>highway bridge used<br>in a travel lane from<br>colony sites. (1 event) | Blair County,<br>Pennsylvania, U.S.A.         | Russell <i>et al.</i> 2009    | S5-34 |
