# Supplementary material
Source: PubMed Central journal article supplement (PMC5942905)
Supplement: NIHMS934046-supplement-Supp_AppendixS6.pdf [file NIHMS934046-supplement-Supp_AppendixS6.pdf]

Supplemental Information “Multiple Mortality Events in Bats: A Global Review”, *Mammal Review* 2016, O’Shea, Cryan, Hayman, Plowright, Streicker.

We provide summaries of pertinent details regarding multiple mortality events of bats in a series of nine appendices. Appendix S10 lists all references cited in Appendices S1-S9. Events are given by region alphabetically, then chronologically within regions. The number of events entered into tallies are given in parentheses under the “Description” column. We attempted to be conservative in designating numbers of events. Unfortunately not all sources provide enough information to allow accurate judgments in each case. Generally we considered events extending over multiple years as one event per year, and events observed at more than one dispersed location as separate events. We considered events impacting more than one species of bat as separate events for each species, unless there was insufficient information on numbers per species. Events with insufficient information for each species were treated as single events. Scientific names follow Simmons (2005) in Wilson and Reeder’s (2005) *Mammal Species of the World*, 3<sup>rd</sup> edition (<http://www.vertebrates.si.edu/msw/mswcfapp/msw/index.cfm>), with the exceptions of *Myotis escalerai* (Ibáñez *et al.* 2006), *Perimyotis subflavus*, and *Parastrellus hesperus* (Hooper *et al.* 2006).

**Appendix S6.** Reports of multiple bat deaths due to fatal interactions with the blades of industrial wind turbines. Events are tallied based on raw carcass counts. The higher estimated rates of mortality also are provided in many cases. These higher estimates are made after statistical corrections for detectability, carcass persistence rates, and observer bias by authors of original sources. These corrections have been based on different theoretical approaches and assumptions and may be subject to improvement (see, for example, Huso 2011, Bastos *et al.* 2013, Korner-Nievergelt *et al.* 2013, Peron *et al.* 2013, Santos *et al.* 2013, Huso *et al.* 2015).

| Region and Species                                         | Date                  | Description                                                                     | Location                                      | Source               | Case |
|------------------------------------------------------------|-----------------------|---------------------------------------------------------------------------------|-----------------------------------------------|----------------------|------|
| <i>Africa</i>                                              |                       |                                                                                 |                                               |                      |      |
| <i>Neoromicia capensis</i> ,<br><i>Tadarida aegyptiaca</i> | Mar 2011-<br>Mar 2012 | Found 18 bat carcasses under a single turbine. (1 event)                        | Nelson Mandela Bay Municipality, South Africa | Doty & Martin 2013   | S6-1 |
| <i>Australia</i>                                           |                       |                                                                                 |                                               |                      |      |
| <i>Tadarida australis</i>                                  | 1967-1971             | Found 22 bat carcasses beneath “Dunlite wind-driven generators”. (ca. 2 events) | Northwestern New South Wales, Australia       | Hall & Richards 1974 | S6-2 |
| <i>Europe</i>                                              |                       |                                                                                 |                                               |                      |      |

|                                                                                                                                                                               |                       |                                                                                                                                                        |                                                                      |                                                |       |
|-------------------------------------------------------------------------------------------------------------------------------------------------------------------------------|-----------------------|--------------------------------------------------------------------------------------------------------------------------------------------------------|----------------------------------------------------------------------|------------------------------------------------|-------|
| Unspecified                                                                                                                                                                   | Mar 2000-<br>Mar 2001 | Estimated mortality of 749 bats annually at 10 wind farms with 400 turbines. (0 events)                                                                | Navarre, Spain                                                       | Petri & Munilla 2002                           | S6-4  |
| <i>Pipistrellus nathusii</i> ,<br><i>P. pipistrellus</i> ,<br><i>Nyctalus noctula</i>                                                                                         | 2001-2003             | Found 36 bat carcasses at 1 facility. (1 event)                                                                                                        | Brandenburg, Germany                                                 | Dürr pers comm in Rodrigues <i>et al.</i> 2008 | S6-5  |
| <i>Eptesicus nilssonii</i> ,<br><i>Vespertilio murinus</i> ,<br><i>Nyctalus noctula</i> ,<br><i>Pipistrellus nathusii</i> ,<br><i>P. pipistrellus</i> ,<br><i>P. pygmaeus</i> | Aug-Oct 2002          | Found 17 bat carcasses beneath 160 wind turbines. (0 events)                                                                                           | Gotland, Öland, Blekinge and Skåne provinces in southeastern Sweden. | Ahlén 2002, 2003                               | S6-6  |
| <i>Nyctalus leisleri</i> ,<br><i>N. noctula</i> ,<br><i>Pipistrellus nathusii</i> ,<br><i>P. pipistrellus</i> ,<br><i>others</i>                                              | Aug-Oct 2002          | Found 34 bat carcasses at a 10-turbine facility. (2 events).                                                                                           | Oberlausitz, Puschwitz, Sachsen, Germany                             | Trapp et al. 2002                              | S6-7  |
| <i>Pipistrellus nathusii</i> ,<br><i>P. pipistrellus</i> ,<br><i>P. spp.</i> ,<br><i>Eptesicus serotinus</i> ,<br><i>Nyctalus noctula</i>                                     | Jul-Sep 2003          | Found 14 bat carcasses at a 4-turbine facility. (1 event)                                                                                              | Tralau, Schleswig-Holstein, Germany                                  | Göttsche & Göbel 2007                          | S6-8  |
| <i>Nyctalus noctula</i>                                                                                                                                                       | Sep 2003-<br>Sep 2004 | Found 13 bat carcasses at an 8-turbine facility. (1 event)                                                                                             | Prellenkirchen, Niederösterreich, Austria                            | Traxler et al. 2004                            | S6-9  |
| <i>Pipistrellus kuhlii</i> ,<br><i>P. pipistrellus</i> ,<br><i>P. nathusii</i> ,<br><i>P. spp.</i> ,<br><i>Eptesicus serotinus</i> ,<br><i>Nyctalus noctula</i>               | 2003-2006             | Found 15 bat carcasses in 2003, 25 in 2004, 21 in 2005, and 16 in 2006 at an 8-turbine facility. Estimated mortality of 152 bats each year. (4 events) | Bouin, Vendée, France                                                | Dulac 2008, 2010                               | S6-10 |

|                                                                                                          |              |                                                                                                                                                    |                                 |                                                                         |       |
|----------------------------------------------------------------------------------------------------------|--------------|----------------------------------------------------------------------------------------------------------------------------------------------------|---------------------------------|-------------------------------------------------------------------------|-------|
| <i>Nyctalus noctula</i> ,<br><i>Pipistrellus nathusii</i> ,<br><i>P. pipistrellus</i> ,<br><i>others</i> | Jun-Oct 2004 | Estimated mortality of 46 deaths per year at 1 facility with 10 turbines. (0 events)                                                               | Puschwitz, Sachsen, Germany     | Endl <i>et al.</i> 2004 unpublished report in Rydell <i>et al.</i> 2010 | S6-11 |
| <i>Nyctalus noctula</i> ,<br><i>Pipistrellus nathusii</i> ,<br><i>P. pipistrellus</i> ,<br><i>others</i> | Jun-Oct 2004 | Estimated mortality of 23 deaths per year at 1 facility with 5 turbines. (0 events)                                                                | Baeyerhöhe, Sachsen, Germany    | Endl <i>et al.</i> 2004 unpublished report in Rydell <i>et al.</i> 2010 | S6-12 |
| <i>Nyctalus noctula</i> ,<br><i>Pipistrellus nathusii</i> ,<br><i>P. pipistrellus</i> ,<br><i>others</i> | Jun-Oct 2004 | Estimated mortality of 22 deaths per year at 1 facility with 17 turbines. (0 events)                                                               | Wendischbora, Sachsen, Germany  | Endl <i>et al.</i> 2004 unpublished report in Rydell <i>et al.</i> 2010 | S6-13 |
| <i>Nyctalus noctula</i> ,<br><i>Pipistrellus nathusii</i> ,<br><i>P. pipistrellus</i> ,<br><i>others</i> | Jun-Oct 2004 | Estimated mortality of 20 deaths per year at 1 facility with 18 turbines. (0 events)                                                               | Ludwigsdorf, Sachsen, Germany   | Endl <i>et al.</i> 2004 unpublished report in Rydell <i>et al.</i> 2010 | S6-14 |
| <i>Nyctalus noctula</i> ,<br><i>Pipistrellus nathusii</i> ,<br><i>P. pipistrellus</i> ,<br><i>others</i> | Jun-Oct 2004 | Estimated mortality of 18 deaths per year at 1 facility with 7 turbines. (0 events)                                                                | Melaune, Sachsen, Germany       | Endl <i>et al.</i> 2004 unpublished report in Rydell <i>et al.</i> 2010 | S6-15 |
| <i>Nyctalus noctula</i> ,<br><i>Pipistrellus nathusii</i> ,<br><i>P. pipistrellus</i> ,<br><i>others</i> | Jun-Oct 2004 | Estimated mortality of 13 deaths per year at 1 facility with 7 turbines. (0 events)                                                                | Reichenbach, Sachsen, Germany   | Endl <i>et al.</i> 2004 unpublished report in Rydell <i>et al.</i> 2010 | S6-16 |
| <i>Nyctalus noctula</i><br><i>Pipistrellus nathusii</i> ,<br><i>P. pipistrellus</i><br><i>others</i>     | Jun-Oct 2004 | Estimated mortality of 13 deaths per year at 1 facility with 5 turbines. (0 events)                                                                | Eckardsberg, Sachsen, Germany   | Endl <i>et al.</i> 2004 unpublished report in Rydell <i>et al.</i> 2010 | S6-17 |
| <i>Pipistrellus pipistrellus</i> ,<br><i>Nyctalus leisleri</i>                                           | Jul-Oct 2004 | Found 11 bat carcasses at two nearby sites with total of 6 turbines. Estimated mortality of 87 bats per year at both facilities combined (1 event) | Ettenheim, Schwarzwald, Germany | Brinkmann <i>et al.</i> 2006                                            | S6-18 |

|                                                                                                                   |                 |                                                                                                                     |                                                     |                                                                                                                         |       |
|-------------------------------------------------------------------------------------------------------------------|-----------------|---------------------------------------------------------------------------------------------------------------------|-----------------------------------------------------|-------------------------------------------------------------------------------------------------------------------------|-------|
| <i>Pipistrellus pipistrellus</i> ,<br><i>Nyctalus leisleri</i> ,<br><i>Pipistrellus sp.</i>                       | Apr-Oct<br>2005 | Found 31 bat carcasses at 1 facility with 4 turbines. Estimated annual mortality of 104 bats. (1 event)             | Rosskopf,<br>Schwarzwald,<br>Germany                | Behr & von Helversen 2006 in Rodrigues <i>et al.</i> 2008 and in Rydell <i>et al.</i> 2010                              | S6-19 |
| <i>Pipistrellus pipistrellus</i> ,<br><i>Nyctalus sp.</i> ,<br><i>Hypsugo savii</i> ,<br><i>Tadarida teniotis</i> | Mar-Oct<br>2006 | Found 29 bat carcasses at a 20-turbine facility. Estimated mortality of 120 bats during the study period. (1 event) | Candal/Coelheira,<br>Portugal                       | Alves <i>et al.</i> 2007 in Rodrigues <i>et al.</i> 2014; Instituto da Conservação da Natureza e da Biodiversidade 2010 | S6-20 |
| Identifications not confirmed                                                                                     | Mar-Dec<br>2006 | Found 12 bat carcasses at a 15-turbine facility. (1 event)                                                          | Outeiro, Portugal                                   | Instituto da Conservação da Natureza e da Biodiversidade 2010                                                           | S6-21 |
| <i>Pipistrellus pipistrellus</i> ,<br><i>Pipistrellus sp.</i> ,<br><i>Nyctalus leisleri</i>                       | Mar-Oct<br>2006 | Found 15 bat carcasses at a 5-turbine facility. Estimated mortality of 60 bats during the study period.(1 event)    | S. Pedro, Portugal                                  | Alves <i>et al.</i> 2007 in Rodrigues <i>et al.</i> 2014                                                                | S6-22 |
| <i>P. pipistrellus</i> ,<br><i>Nyctalus leisleri</i> ,<br><i>N. noctula</i> ,<br><i>Unidentified</i>              | Apr-Oct<br>2006 | Found 47 bat carcasses at 13-25 turbines in region. (3 events)                                                      | Caramulo, Portugal                                  | Instituto da Conservação da Natureza e da Biodiversidade 2010                                                           | S6-23 |
| <i>Nyctalus sp.</i> ,<br><i>Pipistrellus nathusii</i> ,<br><i>P. pygmaeus</i> ,<br><i>Vespertilio murinus</i>     | May-Sep<br>2006 | Found 32 bat carcasses at a 5-turbine facility. (1 event)                                                           | Windpark A4,<br>Muskauer Heide,<br>Sachsen, Germany | Seiche <i>et al.</i> 2007, 2008                                                                                         | S6-24 |

|                                                                                                                                                                                                                                                   |                 |                                                                                                                       |                                                                |                                                                                                                                |       |
|---------------------------------------------------------------------------------------------------------------------------------------------------------------------------------------------------------------------------------------------------|-----------------|-----------------------------------------------------------------------------------------------------------------------|----------------------------------------------------------------|--------------------------------------------------------------------------------------------------------------------------------|-------|
| <i>Nyctalus sp.</i><br><i>Pipistrellus nathusii</i> ,<br><i>P. pipistrellus</i> ,<br><i>P. pygmaeus</i>                                                                                                                                           | May-Sep<br>2006 | Found 29 bat carcasses at a 10-turbine facility. (1 event)                                                            | Windpark A11,<br>Oberlausitzer<br>Gefilde, Sachsen,<br>Germany | Seiche et al.<br>2007, 2008                                                                                                    | S6-25 |
| <i>Eptesicus serotinus</i> ,<br><i>Nyctalus sp.</i> ,<br><i>Pipistrellus nathusii</i> ,<br><i>P. pipistrellus</i> ,<br><i>P. pygmaeus</i>                                                                                                         | May-Sep<br>2006 | Found 15 bat carcasses at a 10-turbine facility. (1 event)                                                            | Windpark A10,<br>Östliche Oberlausitz,<br>Sachsen, Germany     | Seiche et al.<br>2007, 2008                                                                                                    | S6-26 |
| <i>Nyctalus leisleri</i> ,<br><i>Pipistrellus pipistrellus</i> ,<br><i>Pipistrellus sp.</i> ,<br><i>Hypsugo savii</i>                                                                                                                             | 2007            | Found 48 bat carcasses at a 20-turbine facility. Estimated 191 bats killed annually (most in late summer). (2 events) | Candal/Coelheira,<br>Portugal                                  | Amorim et al.<br>2012; Amorim<br>2009 in<br>Rodrigues et al.<br>2014.                                                          | S6-27 |
| <i>Pipistrellus kuhlii</i> ,<br><i>P. pipistrellus</i> ,<br><i>P. pygmaeus</i> ,<br><i>Pipistrellus spp.</i> ,<br><i>Hypsugo savii</i> ,<br><i>Nyctalus lasiopterus</i> ,<br><i>N. leisleri</i> ,<br><i>Eptesicus serotinus</i> ,<br>Unidentified | Mar-Oct<br>2007 | Found 81 bat carcasses at 3-17 turbines in region. (3 events)                                                         | Caramulo, Portugal                                             | Instituto da<br>Conservação da<br>Natureza e da<br>Biodiversidade<br>2010; Silva et<br>al. 2008 in<br>Rodrigues et al.<br>2014 | S6-28 |
| Identifications not<br>confirmed                                                                                                                                                                                                                  | May-Oct<br>2007 | Found 15 bat carcasses at a 14-turbine facility. (1 event)                                                            | Lousã, Portugal                                                | Instituto da<br>Conservação da<br>Natureza e da<br>Biodiversidade<br>2010                                                      | S6-29 |
| Identifications not<br>confirmed                                                                                                                                                                                                                  | Mar-Oct<br>2008 | Found 20 bat carcasses at a 15-turbine facility. (2 events)                                                           | Outeiro, Portugal                                              | Instituto da<br>Conservação da<br>Natureza e da                                                                                | S6-30 |

|                                                                                                                                                                                                                                                    |                              |                                                                                           |                                         |                                                                                                                                                       |       |
|----------------------------------------------------------------------------------------------------------------------------------------------------------------------------------------------------------------------------------------------------|------------------------------|-------------------------------------------------------------------------------------------|-----------------------------------------|-------------------------------------------------------------------------------------------------------------------------------------------------------|-------|
|                                                                                                                                                                                                                                                    |                              |                                                                                           |                                         | Biodiversidade 2010                                                                                                                                   |       |
| <i>Pipistrellus pipistrellus</i> ,<br><i>P. kuhlii</i> ,<br><i>Pipistrellus</i> sp.,<br><i>Unidentified</i>                                                                                                                                        | Jun-Oct 2008                 | Found 10 bat carcasses at a 6-turbine facility. (1 event)                                 | Unspecified, France                     | Beucher & Puech 2008 in Rodrigues et al. 2014                                                                                                         | S6-31 |
| <i>Pipistrellus kuhlii</i> ,<br><i>Nyctalus leisleri</i> ,<br><i>Eptesicus</i> sp.                                                                                                                                                                 | Jan-Dec 2009                 | Found 10 bat carcasses at a 14-turbine facility. (1 event)                                | Serra do Mú, Portugal                   | Bio3 (2010) in Rodrigues et al. 2014                                                                                                                  | S6-32 |
| <i>Hypsugo savii</i> ,<br><i>Pipistrellus pipistrellus</i> ,<br><i>P. kuhlii</i> ,<br><i>P. nathusii</i> ,<br><i>P. pygmaeus</i> ,<br><i>Nyctalus leisleri</i> ,<br><i>N. lasiopterus</i> ,<br><i>Eptesicus serotinus</i> ,<br><i>Unidentified</i> | Jun-Oct 2008<br>May-Sep 2009 | Found 73 bat carcasses at a 13-turbine facility in 2008, 98 carcasses in 2009. (4 events) | Castelnau-Pegayrols, Aveyron, France    | Beucher et al. 2013 in Rodrigues 2014, LPO 12, 2008 EXEN & KJM (Y. Beucher) 2011 in Rodrigues et al. 2014, Trille et al. 2008 in Rodrigues et al 2014 | S6-33 |
| <i>Myotis emarginatus</i> ,<br><i>Pipistrellus</i> sp.,<br><i>Tadarida teniotis</i> ,<br><i>Unidentified</i>                                                                                                                                       | Mar-Nov 2009                 | Found 103 bat carcasses at a 9-turbine facility. (1 event)                                | Mas de Leuze, St-Martin-de-Crau, France | Rico & Lagrange 2012; Aves Environnement & GCP 2009 in Rodrigues et al. 2014                                                                          | S6-34 |
| <i>Pipistrellus pipistrellus</i> ,<br><i>Nyctalus leisleri</i> ,<br><i>Hypsugo savii</i> ,<br><i>Unidentified</i>                                                                                                                                  | Aug-Oct 2009                 | Found 20 bat carcasses at a 7-turbine facility. (1 event)                                 | Lou Paou, Lozère, France                | F. Sané, pers. com., in Rodrigues et al. 2014                                                                                                         | S6-35 |

|                                                                                                                                                                                                                                                                              |                       |                                                                                                     |                                      |                                                                                       |       |
|------------------------------------------------------------------------------------------------------------------------------------------------------------------------------------------------------------------------------------------------------------------------------|-----------------------|-----------------------------------------------------------------------------------------------------|--------------------------------------|---------------------------------------------------------------------------------------|-------|
| <i>Nyctalus leisleri</i> ,<br><i>P. pipistrellus/pygmaeus</i> ,<br><i>Pipistrellus nathusii</i> ,<br><i>Hypsugo savii</i> ,<br><i>Nyctalus noctula</i>                                                                                                                       | Aug 2009-<br>Jul 2010 | Found 183 bat carcasses during searches of 88 turbines at 9 wind energy facilities. (8 events)      | Northeastern Greece                  | Georgiakakis <i>et al.</i> 2012                                                       | S6-36 |
| <i>Pipistrellus pipistrellus</i> ,<br><i>Pipistrellus kuhlii</i><br><i>Nyctalus leisleri</i> ,<br><i>Hypsugo savii</i> ,<br><i>Eptesicus serotinus</i>                                                                                                                       | Apr-Oct<br>2010       | Found 13 bat carcasses at a 25-turbine facility. (1 event)                                          | Terra Fria-Montalegre, Portugal      | Bio3 (2011b) in Rodrigues <i>et al.</i> 2014                                          | S6-37 |
| <i>Pipistrellus pipistrellus</i> ,<br><i>P. kuhlii</i> ,<br><i>P. nathusii</i> ,<br><i>P. pygmaeus</i> ,<br><i>Miniopterus schreibersii</i> ,<br><i>Nyctalus leisleri</i> ,<br><i>N. noctula</i> ,<br><i>Hypsugo savii</i> ,<br><i>Eptesicus serotinus</i> ,<br>Unidentified | May-Oct<br>2010       | Found 42 bats at a 2-turbine facility. Estimated mortality rate of 120-261 bats annually. (1 event) | La Répara-Auriples, Drôme, France    | GCRA-LPO 26 (J. Cornut) 2011 in Rodrigues <i>et al.</i> 2014; Cornut and Vincent 2010 | S6-38 |
| <i>Pipistrellus pipistrellus</i> ,<br><i>Pipistrellus sp.</i> ,<br><i>Nyctalus leisleri</i>                                                                                                                                                                                  | Jun-Sep 2010          | Found 10 bat carcasses at an 18-turbine facility. (1 event)                                         | Terra Fria - Facho-Colmeia, Portugal | Bio3 (2011a) in Rodrigues <i>et al.</i> 2014                                          | S6-39 |
| Unspecified                                                                                                                                                                                                                                                                  | ca. 2010, 4-months    | Found 48 bat carcasses at a 5-turbine facility. (1 event)                                           | Loire Atlantique 1, France           | Unpublished data in Rodrigues <i>et al.</i> 2014                                      | S6-40 |
| Unspecified                                                                                                                                                                                                                                                                  | ca. 2010, 4-months    | Found 28 bats at a 3-turbine facility. (1 event)                                                    | Loire Atlantique 2, France           | Unpublished data in Rodrigues <i>et al.</i> 2014                                      | S6-41 |
| Unspecified                                                                                                                                                                                                                                                                  | ca. 2011, 7-months    | Found 15 bat carcasses at a 5-turbine facility. (1 event)                                           | Loire Atlantique 1, France           | Unpublished data in                                                                   | S6-42 |

|                                                                                                                                                                     |                    |                                                                                                                  |                                         |                                                    |       |
|---------------------------------------------------------------------------------------------------------------------------------------------------------------------|--------------------|------------------------------------------------------------------------------------------------------------------|-----------------------------------------|----------------------------------------------------|-------|
|                                                                                                                                                                     |                    |                                                                                                                  |                                         | Rodrigues et al. 2014                              |       |
| Unspecified                                                                                                                                                         | ca. 2011, 7 months | Found 25 bat carcasses at a 3-turbine facility. (1 event)                                                        | Loire Atlantique 2, France              | Unpublished data in Rodrigues et al. 2014          | S6-43 |
| Unspecified                                                                                                                                                         | 12 Jul-1 Oct 2011  | Found 54 bat carcasses at a 9-turbine facility. (1 event)                                                        | Mas de Leuze, St-Martin-de-Crau, France | Rico & Lagrange 2012                               | S6-44 |
| Unspecified                                                                                                                                                         | ca. 2011           | Found 13 bat carcasses at a 6-turbine facility. (1 event)                                                        | Morbihan 1, France                      | Unpublished data in Rodrigues et al. 2014          | S6-45 |
| <i>Pipistrellus kuhlii</i> ,<br><i>P. pygmaeus</i> ,<br><i>Miniopterus schreibersii</i><br><i>Nyctalus leisleri</i> ,<br><i>Tadarida teniotis</i> ,<br>Unidentified | Apr-Nov 2011       | Found 12 bat carcasses at a 7-turbine facility. (1 event)                                                        | Serra de Alvaiázere, Portugal.          | Procesl 2012 in Rodrigues et al. 2014.             | S6-46 |
| <i>Pipistrellus nathusii</i> ,<br><i>P. pipistrellus</i> ,<br><i>Pipistrellus</i> sp.,<br><i>Nyctalus noctula</i> ,<br><i>N. leisleri</i>                           | Apr-Oct 2012       | Found 12 bat carcasses at a 2-turbine facility. Estimated mortality of 17 bats during the study period (1 event) | Belum, Cuxhaven, Germany                | Bach & Tillmann 2012 in Rodrigues et al. 2014      | S6-47 |
| <i>Nyctalus leisleri</i> ,<br><i>N. noctula</i> ,<br><i>Pipistrellus nathusii</i> ,<br><i>P. pipistrellus</i> ,<br><i>Vespertilio murinus</i> ,<br>Unidentified     | May-Oct 2012       | Found 27 bat carcasses at a 6-turbine facility. (2 events)                                                       | Sudete Foothills, southwestern Poland   | Gottfried & Gottfried 2012 in Rodrigues et al 2014 | S6-48 |
| Unspecified                                                                                                                                                         | Apr-Oct 2013       | Found 10 bat carcasses at a 5-turbine facility. (1 event)                                                        | Southern Belgium                        | Pewez, CSD Ingenieurs                              | S6-49 |



|                                                                                                                                                                                         |                                        |                                                                                                                                                                                                             |                                                                         |                                                |       |
|-----------------------------------------------------------------------------------------------------------------------------------------------------------------------------------------|----------------------------------------|-------------------------------------------------------------------------------------------------------------------------------------------------------------------------------------------------------------|-------------------------------------------------------------------------|------------------------------------------------|-------|
|                                                                                                                                                                                         |                                        |                                                                                                                                                                                                             |                                                                         | Conseils 2013<br>in Rodrigues et<br>al. 2014   |       |
| <i>Pipistrellus nathusii</i> ,<br><i>P. pipistrellus</i> ,<br><i>P. pygmaeus</i> ,<br><i>Nyctalus noctula</i>                                                                           | Jul-Oct 2013                           | Found 21 bat carcasses at a 12-<br>turbine facility. (1 event)                                                                                                                                              | Walsrode, Germany                                                       | Bach et al. 2014<br>in Rodrigues et<br>al 2014 | S6-50 |
| <b>Islands</b>                                                                                                                                                                          |                                        |                                                                                                                                                                                                             |                                                                         |                                                |       |
| <i>Chalinolobus gouldii</i><br><i>Vespadelus darlingtoni</i><br><i>Vespadelus spp.</i>                                                                                                  | 2002-2010                              | Found 75 bat carcasses beneath<br>62 turbines at two wind<br>facilities. (ca. 2 events)                                                                                                                     | Bluff Point and<br>Studland Bay,<br>Northwestern<br>Tasmania, Australia | Hull &<br>Cawthen 2013                         | S6-3  |
| <b>North America</b>                                                                                                                                                                    |                                        |                                                                                                                                                                                                             |                                                                         |                                                |       |
| <i>Lasiurus borealis</i> ,<br><i>Lasiurus cinereus</i> ,<br><i>Lasionycteris noctivagans</i> ,<br><i>Perimyotis subflavus</i> ,<br><i>Myotis lucifugus</i> ,<br><i>Eptesicus fuscus</i> | Mar-Nov<br>1998, 1999                  | Found 184 carcasses (primarily<br><i>L. cinereus</i> and <i>L. borealis</i> ) in<br>searches of 91 turbines at a 354-<br>turbine facility. Estimated<br>mortality of up to 578 bats<br>annually. (4 events) | Lincoln and<br>Pipestone counties,<br>Minnesota, USA                    | Johnson et al.<br>2003a                        | S6-51 |
| <i>Lasiurus cinereus</i> ,<br><i>Lasionycteris noctivagans</i> ,<br><i>Myotis lucifugus</i> ,<br><i>Unidentified</i>                                                                    | 1999                                   | Found 10 carcasses at one 38-<br>turbine facility Estimated<br>mortality of 28 bats annually. (1<br>event)                                                                                                  | Vansycle Wind<br>Project, Umatilla<br>County, Oregon USA                | Erickson et al<br>2000                         | S6-52 |
| <i>Lasiurus cinereus</i> ,<br><i>Lasionycteris noctivagans</i> ,<br><i>Eptesicus fuscus</i> ,<br><i>Myotis lucifugus</i> ,<br><i>Unidentified</i>                                       | 1999, 2000,<br>Jun 2001 to<br>Jun 2002 | Found 47 bat carcasses<br>(primarily <i>L. cinereus</i> ) in 1999,<br>19 in 2000, and 14 in 2001-2002<br>at one 69-turbine facility.<br>Estimated mortality of 90 bats<br>annually. (3 events)              | Foote Creek Rim,<br>Carbon County,<br>Wyoming                           | Young et al.<br>2003; Gruver<br>2002           | S6-53 |

|                                                                                                                                                                                         |                                   |                                                                                                                                                                                                 |                                                                      |                           |       |
|-----------------------------------------------------------------------------------------------------------------------------------------------------------------------------------------|-----------------------------------|-------------------------------------------------------------------------------------------------------------------------------------------------------------------------------------------------|----------------------------------------------------------------------|---------------------------|-------|
| <i>Lasiurus borealis</i> ,<br><i>Lasiurus cinereus</i> ,<br><i>Lasionycteris noctivagans</i> ,<br><i>Eptesicus fuscus</i> ,<br><i>Myotis lucifugus</i> ,<br><i>Myotis</i> sp.           | Jul 1999 to<br>Jul 2001           | Found 72 bat carcasses at a 31-turbine facility. Estimated mortality of 132 bats annually. (3 events)                                                                                           | Kewaunee County,<br>Wisconsin, USA                                   | Howe et al.<br>2002       | S6-54 |
| <i>Lasiurus borealis</i> ,<br><i>Lasiurus cinereus</i> ,<br><i>Lasionycteris noctivagans</i> ,<br><i>Eptesicus fuscus</i>                                                               | Jul-Oct 2000                      | Found 71 bat carcasses in searches of 68 turbines at a 281-turbine sampling area. Estimated mortality of 528 bats during the study period. (2 events)                                           | Lincoln and<br>Pipestone counties,<br>Minnesota, USA                 | Krenz &<br>McMillan 2000  | S6-55 |
| <i>Lasiurus cinereus</i> ,<br><i>Lasionycteris noctivagans</i> ,<br><i>Myotis lucifugus</i>                                                                                             | Apr 2001-Jan<br>2002              | Found 52 bat carcasses (primarily <i>L. noctivagans</i> and <i>L. cinereus</i> ) beneath 60 turbines at 1 facility. (2 events)                                                                  | Pincher Creek,<br>southern Alberta,<br>Canada                        | Brown &<br>Hamilton 2006a | S6-56 |
| <i>Lasiurus borealis</i> ,<br><i>Lasiurus cinereus</i> ,<br><i>Lasionycteris noctivagans</i> ,<br><i>Myotis lucifugus</i> ,<br><i>Eptesicus fuscus</i>                                  | Jun-Sep<br>2001, 2002             | Found 151 carcasses (primarily <i>L. cinereus</i> and <i>L. borealis</i> ) in searches of 83-103 turbines at a 409-turbine facility. Estimated mortality of up to 849 bats annually. (4 events) | Lincoln and<br>Pipestone counties,<br>Minnesota, USA                 | Johnson et al.<br>2004    | S6-57 |
| <i>Lasiurus cinereus</i> ,<br><i>Lasionycteris noctivagans</i> ,<br><i>Myotis lucifugus</i>                                                                                             | Jul-Sep<br>2001, Jun-<br>Nov 2002 | Found 39 bat carcasses (primarily <i>L. cinereus</i> ) at a 60-turbine facility in 2001, and 13 carcasses in 2002 (3 events)                                                                    | Castle River,<br>southern Alberta,<br>Canada                         | Brown &<br>Hamilton 2002  | S6-58 |
| <i>Eptesicus fuscus</i> ,<br><i>Lasiurus borealis</i><br><i>Lasiurus cinereus</i> ,<br><i>Lasiurus seminolus</i> ,<br><i>Lasionycteris noctivagans</i> ,<br><i>Perimyotis subflavus</i> | 2001-2003                         | Found 118 bat carcasses (primarily <i>L. borealis</i> , <i>P. subflavus</i> , and <i>L. cinereus</i> ) at a three-turbine facility. Estimated mortality of 62 bats annually. (4 events)         | Buffalo Mountain<br>Wind Farm,<br>Anderson County,<br>Tennessee, USA | Fiedler 2004              | S6-59 |
| <i>Lasiurus cinereus</i> ,<br><i>Lasionycteris noctivagans</i> ,                                                                                                                        | Jul-Dec 2001                      | Found ~177 bat carcasses (primarily <i>L. cinereus</i> and <i>L.</i>                                                                                                                            | Stateline site,<br>Umatilla County,                                  | Erickson et al.<br>2004   | S6-60 |

|                                                                                                                                                                                                                                                     |                                     |                                                                                                                                                                                                                                  |                                                |                             |       |
|-----------------------------------------------------------------------------------------------------------------------------------------------------------------------------------------------------------------------------------------------------|-------------------------------------|----------------------------------------------------------------------------------------------------------------------------------------------------------------------------------------------------------------------------------|------------------------------------------------|-----------------------------|-------|
| <i>Myotis lucifugus</i> ,<br><i>Eptesicus fuscus</i> ,<br><i>Unidentified</i>                                                                                                                                                                       | Jan-Dec<br>2002, Jan-<br>Dec 2003   | <i>noctivagans</i> ) in searches of 124 turbines in one 454-turbine facility in 2001-2002, and 153 in 2003. Estimated mortality of 500 bats annually. (6 events)                                                                 | Oregon and Walla Walla County, Washington, USA |                             |       |
| <i>Lasiurus cinereus</i> ,<br><i>Lasionycteris noctivagans</i> ,<br><i>Myotis sp.</i>                                                                                                                                                               | 2002-2003                           | Estimated mortality of 19 bats annually at one 16-turbine facility. (0 events)                                                                                                                                                   | Sherman County, Oregon, USA                    | Johnson et al. 2003b        | S6-61 |
| <i>Lasiurus cinereus</i> ,<br><i>Lasionycteris noctivagans</i>                                                                                                                                                                                      | 2002-2003                           | Found 27 bat carcasses at one 37-turbine facility. Estimated mortality of 119 bats annually. (2 events)                                                                                                                          | Nine Canyon site, Benton County, Washington    | Erickson et al. 2003        | S6-62 |
| <i>Eptesicus fuscus</i> ,<br><i>Lasiurus borealis</i> ,<br><i>Lasiurus cinereus</i> ,<br><i>Lasionycteris noctivagans</i> ,<br><i>Myotis lucifugus</i> ,<br><i>Myotis septentrionalis</i> ,<br><i>Perimyotis subflavus</i> ,<br><i>Unidentified</i> | Apr-Nov<br>2003                     | Found 475 bat carcasses (primarily <i>L. cinereus</i> , <i>L. borealis</i> , <i>P. subflavus</i> ) at one facility with 44 turbines. Provisional estimated mortality of 2,092 bats during the 7.5 month study period. (5 events) | Mountaineer Site, near Thomas, West Virginia   | Kerns & Kerlinger 2004      | S6-63 |
| <i>Lasiurus borealis</i> ,<br><i>Lasiurus cinereus</i> ,<br><i>Lasionycteris noctivagans</i> ,<br><i>Eptesicus fuscus</i> ,<br><i>Myotis lucifugus</i>                                                                                              | Apr-Dec<br>2003                     | Found 31 bat carcasses during searches of 26 turbines at an 89-turbine facility. Estimated mortality of 167 bats during the study period. (1 event)                                                                              | Worth County, Iowa, USA                        | Koford et al. 2004          | S6-64 |
| <i>Lasiurus cinereus</i> ,<br><i>Lasionycteris noctivagans</i> ,<br><i>Myotis lucifugus</i> ,<br><i>Eptesicus fuscus</i>                                                                                                                            | Jul 2003-Jun<br>2004                | Found 54 bat carcasses (primarily <i>L. cinereus</i> ) beneath 114 turbines at 1 facility. (1 event)                                                                                                                             | McBride Lake, southern Alberta, Canada         | Brown & Hamilton 2006b      | S6-65 |
| <i>Eptesicus fuscus</i> ,<br><i>Lasiurus borealis</i> ,<br><i>Lasiurus cinereus</i> ,<br><i>Lasionycteris noctivagans</i> ,                                                                                                                         | Apr-Dec<br>2003,<br>Apr-Dec<br>2004 | Found 35 bat carcasses in 2003 and 45 bat carcasses in 2004 (primarily <i>L. cinereus</i> , <i>L. borealis</i> ) in searches of 26                                                                                               | Worth County, Iowa                             | Jain 2005, Jain et al. 2011 | S6-66 |

|                                                                                                                                                                                                                                                     |                           |                                                                                                                                                                                                                                          |                                              |                                                   |       |
|-----------------------------------------------------------------------------------------------------------------------------------------------------------------------------------------------------------------------------------------------------|---------------------------|------------------------------------------------------------------------------------------------------------------------------------------------------------------------------------------------------------------------------------------|----------------------------------------------|---------------------------------------------------|-------|
| <i>Myotis lucifugus</i> ,<br><i>Perimyotis subflavus</i>                                                                                                                                                                                            |                           | turbines at one 89-turbine facility. Estimated annual mortality of 588 bats in 2003 and 786 bats in 2004. (3 events)                                                                                                                     |                                              |                                                   |       |
| <i>Lasiurus cinereus</i> ,<br><i>Lasionycteris noctivagans</i>                                                                                                                                                                                      | Jun-Nov<br>2004           | Found 21 dead bats at a 41-turbine facility. Estimated mortality of 77 bats over the study period. (1 event)                                                                                                                             | Eurus Hills, Umatilla County, Oregon USA     | Young et al. 2006                                 | S6-67 |
| <i>Eptesicus fuscus</i> ,<br><i>Lasiurus borealis</i> ,<br><i>Lasiurus cinereus</i> ,<br><i>Lasionycteris noctivagans</i> ,<br><i>Myotis lucifugus</i> ,<br><i>Perimyotis subflavus</i> ,<br><i>Unidentified</i>                                    | Jul-Sep 2004              | Found 466 bat carcasses over a 6-week period in searches (primarily <i>L. cinereus</i> , <i>L. borealis</i> , <i>P. subflavus</i> ) at one facility with 44 turbines. Estimated mortality of 1,672 bats during 6-week period. (6 events) | Mountaineer Site, near Thomas, West Virginia | Kerns et al. 2005                                 | S6-68 |
| <i>Eptesicus fuscus</i> ,<br><i>Lasiurus borealis</i> ,<br><i>Lasiurus cinereus</i> ,<br><i>Lasionycteris noctivagans</i> ,<br><i>Myotis lucifugus</i> ,<br><i>Myotis septentrionalis</i> ,<br><i>Perimyotis subflavus</i> ,<br><i>Unidentified</i> | Aug-Sep<br>2004           | Found 299 bat carcasses over a 6-week period (primarily <i>L. cinereus</i> , <i>L. borealis</i> ) in searches at facility with 20 turbines. Estimated mortality of 480 bats during 6-week period. (5 events)                             | Meyersdale Site, Pennsylvania, USA           | Kerns et al. 2005                                 | S6-69 |
| <i>Tadarida brasiliensis</i> ,<br><i>Eptesicus fuscus</i> ,<br><i>Lasiurus borealis</i> ,<br><i>Lasiurus cinereus</i> ,<br><i>Lasionycteris noctivagans</i> ,<br><i>Perimyotis subflavus</i> ,<br><i>Myotis velifer</i>                             | May-Jul<br>2004, 2005     | Found 111 bat carcasses (primarily <i>T. brasiliensis</i> ) at a 68-turbine facility. Estimated mortality of 81-108 bats annually. (3 events)                                                                                            | Northwestern Oklahoma, USA                   | Piorkowski 2006,<br>Piorkowski and O'Connell 2010 | S6-70 |
| <i>Lasiurus cinereus</i> ,                                                                                                                                                                                                                          | Aug 2003-Jul<br>2004, Aug | Found 70 bat carcasses in 2003-2004, 47 in 2004-2005                                                                                                                                                                                     | Solano County, California, USA               | Kerlinger et al. 2006                             | S6-71 |

|                                                                                                                                                                                                        |                                           |                                                                                                                                                                                                        |                                                         |                        |       |
|--------------------------------------------------------------------------------------------------------------------------------------------------------------------------------------------------------|-------------------------------------------|--------------------------------------------------------------------------------------------------------------------------------------------------------------------------------------------------------|---------------------------------------------------------|------------------------|-------|
| <i>L. blossevillii</i> ,<br><i>Lasionycteris noctivagans</i> ,<br><i>Tadarida brasiliensis</i>                                                                                                         | 2004-Jul<br>2005                          | (primarily <i>L. cinereus</i> and <i>T. brasiliensis</i> ) in searches of 90 turbines at 1 facility. Estimated annual mortality of 373 bats in year 1 and 245 in year 2. (4 events)                    |                                                         |                        |       |
| <i>Eptesicus fuscus</i> ,<br><i>Lasiurus borealis</i> ,<br><i>Lasiurus cinereus</i> ,<br><i>Lasiurus seminolus</i> ,<br><i>Lasionycteris noctivagans</i> ,<br><i>Perimyotis subflavus</i> ,<br>Unknown | 2005                                      | Found 243 bat carcasses (primarily <i>L. borealis</i> , <i>P. subflavus</i> , and <i>L. cinereus</i> ) in 40 searches at an 18-turbine facility. Estimated mortality of 1,149 bats annually.(4 events) | Buffalo Mountain Wind Farm, Anderson County, Tennessee  | Fiedler et al. 2007    | S6-72 |
| <i>Eptesicus fuscus</i> ,<br><i>Lasiurus borealis</i> ,<br><i>Lasiurus cinereus</i> ,<br><i>Myotis lucifugus</i> ,<br><i>Lasionycteris noctivagans</i>                                                 | Jan 2005-Jan<br>2006                      | Found 532 bat carcasses (primarily <i>L. noctivagans</i> and <i>L. cinereus</i> ) in 66 searches of 39 turbines at 1 facility. Estimated mortality of 720 bats per year. (2 events)                    | Summerview near Pincher Creek, southern Alberta, Canada | Brown & Hamilton 2006c | S6-73 |
| <i>Lasiurus borealis</i> ,<br><i>Lasiurus cinereus</i> ,<br><i>Lasionycteris noctivagans</i>                                                                                                           | Sep-Nov<br>2005, Mar-<br>May, Aug<br>2006 | Found 21 dead bats at searches of all turbines at a 33-turbine facility. Estimated mortality of 93 bats during study period. (1 event)                                                                 | Crescent Ridge, Bureau County, Illinois, USA            | Kerlinger et al 2007   | S6-74 |
| <i>Lasiurus cinereus</i> ,<br><i>Lasionycteris noctivagans</i> ,<br><i>Myotis lucifugus</i> ,<br><i>Eptesicus fuscus</i>                                                                               | Apr-Oct<br>2006                           | Found 19 dead bats at an 83-turbine facility. Estimated mortality of 94 bats per year. (1 event)                                                                                                       | Hopkins Ridge, Columbia County, Washington USA          | Young et al. 2007      | S6-75 |
| <i>Lasiurus borealis</i> ,<br><i>Lasiurus cinereus</i> ,<br><i>Eptesicus fuscus</i> ,<br>Unidentified                                                                                                  | May-Sep<br>2006                           | Found 16 dead bats (primarily <i>L. cinereus</i> ) at a 36-turbine facility. Estimated mortality of 69 bats over the study period. (1 event)                                                           | Brown County, Nebraska, USA                             | Derby et al. 2007      | S6-76 |

|                                                                                                                                                                                               |                                     |                                                                                                                                                                                                                             |                                            |                                                      |       |
|-----------------------------------------------------------------------------------------------------------------------------------------------------------------------------------------------|-------------------------------------|-----------------------------------------------------------------------------------------------------------------------------------------------------------------------------------------------------------------------------|--------------------------------------------|------------------------------------------------------|-------|
| <i>Eptesicus fuscus</i> ,<br><i>Lasiurus borealis</i> ,<br><i>Lasiurus cinereus</i> ,<br><i>Lasionycteris noctivagans</i> ,<br><i>Myotis lucifugus</i>                                        | Jun-Nov<br>2006                     | Found 326 bat carcasses (primarily <i>L. cinereus</i> , <i>L. borealis</i> , <i>L. noctivagans</i> ) in searches of 50 turbines at one 195-turbine facility. Estimated mortality up to 2,963 bats annually. (5 events)      | Lowville, New York                         | Jain et al. 2007                                     | S6-77 |
| <i>Tadarida brasiliensis</i> ,<br><i>Lasiurus cinereus</i> ,<br><i>Lasiurus borealis</i> ,<br><i>Parastrellus hesperus</i>                                                                    | Sep 2006 -<br>Sep 2007              | Found 56 bat carcasses (primarily <i>T. brasiliensis</i> ) at 1 facility while searching 28 turbines. Estimated mortality rate of 37 bats per MW each active season at a facility with fifty-six 1.5 MW turbines. (1 event) | Southeast of Lubbock, Texas, USA           | Miller 2008                                          | S6-78 |
| <i>Eptesicus fuscus</i> ,<br><i>Lasiurus borealis</i> ,<br><i>Lasiurus cinereus</i> ,<br><i>Myotis lucifugus</i> ,<br><i>Myotis volans</i> ,<br><i>Lasionycteris noctivagans</i> ,<br>Unknown | 15 Jul - 30<br>Sep 2006 and<br>2007 | Found 993 bats (primarily <i>L. cinereus</i> and <i>L. noctivagans</i> ) dead beneath turbines at 1 facility with 39 turbines. Estimated fatality rate of 21 bats per turbine per year. (5 events)                          | Site 3, Southwestern Alberta, Canada       | Baerwald & Barclay 2011;<br>Baerwald et al. 2008     | S6-79 |
| <i>Lasiurus cinereus</i> ,<br><i>Lasionycteris noctivagans</i> ,<br>Unidentified                                                                                                              | Aug-Oct<br>2006, Feb-<br>May 2007   | Found 36 bat carcasses (primarily <i>L. cinereus</i> ) in searches of a subset of 20 turbines at a 90-turbine facility. Estimated mortality of 1,201 bats during study period. (1 event)                                    | Judith Gap, Wheatland County, Montana, USA | Poulton and Erickson 2010,<br>TRC Environmental 2008 | S6-80 |
| <i>Lasiurus cinereus</i> ,<br><i>Lasionycteris noctivagans</i>                                                                                                                                | Warm<br>seasons<br>2006, 2007       | Estimated mortality of ~27 bats per turbine per year at facility with 35 turbines. (0 events)                                                                                                                               | Site 4, Southwestern Alberta, Canada       | Baerwald & Barclay 2009                              | S6-81 |

|                                                                                                                                                                        |                                   |                                                                                                                                                                                                                                   |                                                             |                          |       |
|------------------------------------------------------------------------------------------------------------------------------------------------------------------------|-----------------------------------|-----------------------------------------------------------------------------------------------------------------------------------------------------------------------------------------------------------------------------------|-------------------------------------------------------------|--------------------------|-------|
| <i>Lasiurus cinereus</i> ,<br><i>Lasionycteris noctivagans</i>                                                                                                         | Warm seasons<br>2006, 2007        | Estimated mortality of ~26 bats per turbine per year at facility with 1 turbine. (0 events)                                                                                                                                       | Site 6, Southwestern Alberta, Canada                        | Baerwald & Barclay 2009  | S6-82 |
| <i>Lasiurus cinereus</i> ,<br><i>Lasionycteris noctivagans</i>                                                                                                         | Warm season<br>2007               | Estimated mortality of ~32 bats per turbine per year at facility with 2 turbines. (0 events)                                                                                                                                      | Site 2, Southwestern Alberta, Canada                        | Baerwald & Barclay 2009  | S6-83 |
| <i>Lasiurus cinereus</i> ,<br><i>Lasionycteris noctivagans</i> ,<br><i>Myotis lucifugus</i>                                                                            | Jan-Dec<br>2007                   | Found 17 dead bats beneath 64 searched turbines at a 127 turbine facility. Estimated mortality of 89 bats annually. (1 event)                                                                                                     | Wild Horse facility, Kittitas County, Washington, USA       | Erickson et al. 2008     | S6-84 |
| <i>Lasiurus borealis</i> ,<br><i>Lasiurus cinereus</i> ,<br><i>Myotis lucifugus</i> ,<br><i>Lasionycteris noctivagans</i>                                              | Apr-Jun, Jul-Aug, Aug-Sep<br>2007 | Found 24 bat carcasses (primarily <i>L. cinereus</i> and <i>L. noctivagans</i> ) in searches of a 28-turbine facility. Estimated fatality rate of 122 bats during the study period. (1 event)                                     | Mars Hill Wind Farm, Aroostook County, Maine, USA           | Stantec Consulting 2008a | S6-85 |
| <i>Eptesicus fuscus</i> ,<br><i>Lasiurus borealis</i><br><i>Lasiurus cinereus</i> ,<br><i>Myotis lucifugus</i> ,<br><i>Lasionycteris noctivagans</i> ,<br>Unidentified | Apr-Nov<br>2007                   | Found 283 bat carcasses (primarily <i>L. cinereus</i> ) during searches of 64 turbines at a 195-turbine facility. Estimated mortality of 2,086 to 2,704 bats (depending on estimation method) during the study period. (5 events) | Maple Ridge Wind Power Project, Lewis County, New York, USA | Jain et al. 2009a        | S6-86 |
| <i>Lasiurus borealis</i> ,<br><i>Lasiurus cinereus</i>                                                                                                                 | Aug-Sep<br>2007                   | Found 27 bat carcasses at a 5-turbine facility. (1 event)                                                                                                                                                                         | Near Atlantic City, New Jersey, USA                         | Péron et al. 2013        | S6-87 |
| <i>Lasionycteris noctivagans</i> ,<br><i>Lasiurus cinereus</i> ,<br><i>Lasiurus borealis</i> ,<br><i>Myotis lucifugus</i>                                              | Aug-Sep<br>2007                   | Found 98 bat carcasses (primarily <i>L. noctivagans</i> and <i>L. cinereus</i> ) beneath 29 turbines searched at 1 facility with 63                                                                                               | St. Léon, Manitoba, Canada                                  | Jameson & Willis 2012    | S6-88 |

|                                                                                                                                                                                                                            |                                          |                                                                                                                                                                                                                                                                                                                                |                                                             |                    |       |
|----------------------------------------------------------------------------------------------------------------------------------------------------------------------------------------------------------------------------|------------------------------------------|--------------------------------------------------------------------------------------------------------------------------------------------------------------------------------------------------------------------------------------------------------------------------------------------------------------------------------|-------------------------------------------------------------|--------------------|-------|
|                                                                                                                                                                                                                            |                                          | turbines. Estimated fatality rate of 819 bats annually. (2 events)                                                                                                                                                                                                                                                             |                                                             |                    |       |
| Unspecified, 19 species                                                                                                                                                                                                    | 2007-early 2008                          | Reported 123 bat carcasses of 19 species at a 98 turbine facility. (1 event)                                                                                                                                                                                                                                                   | La Venta II, Oaxaca, Mexico                                 | Ledec et al. 2011  | S6-89 |
| <i>Eptesicus fuscus</i> ,<br><i>Lasiurus borealis</i> ,<br><i>Lasiurus cinereus</i> ,<br><i>Myotis lucifugus</i> ,<br><i>Lasionycteris noctivagans</i> ,<br>Unidentified                                                   | Apr-Nov 2008                             | Found 216 bat carcasses (primarily <i>L. cinereus</i> ) during searches of 64 turbines at a 195-turbine facility. Estimated mortality of 1,595 to 1,739 bats (depending on estimation method) annually. (5 events)                                                                                                             | Maple Ridge Wind Power Project, Lewis County, New York, USA | Jain et al. 2009b  | S6-90 |
| <i>Eptesicus fuscus</i> ,<br><i>Lasiurus borealis</i> ,<br><i>Lasiurus cinereus</i> ,<br><i>Myotis lucifugus</i> ,<br><i>Perimyotis subflavus</i> ,<br><i>Lasionycteris noctivagans</i> ,<br><i>Myotis septentrionalis</i> | Jul-Oct 2008                             | Found 209 bat carcasses (primarily <i>L. borealis</i> and <i>L. cinereus</i> ) in searches of 27 turbines at an 82-turbine facility. Estimated mortality of 1,985 bats during the study period. (6 events)                                                                                                                     | Mount Storm, Grant County, West Virginia, USA               | Young et al. 2009  | S6-91 |
| <i>Eptesicus fuscus</i> ,<br><i>Lasiurus borealis</i> ,<br><i>Lasiurus cinereus</i> ,<br><i>Myotis lucifugus</i> ,<br><i>Perimyotis subflavus</i> ,<br><i>Lasionycteris noctivagans</i>                                    | 27 Jul - 9 Oct 2008, 26 Jul - 8 Oct 2009 | Found 39 bat carcasses (primarily <i>Lasiurus borealis</i> , <i>L. cinereus</i> , <i>Lasionycteris noctivagans</i> ) beneath 12 wind turbines in a 23-turbine facility searched in 2008, and 31 in 2009 during an experiment to determine the efficacy of reducing bat fatalities by altering turbine blade speeds. (4 events) | Somerset County, Pennsylvania, USA                          | Arnett et al. 2011 | S6-92 |



|                                                                                                                                                                                                                                                                                          |                 |                                                                                                                                                                                                            |                                                             |                                    |       |
|------------------------------------------------------------------------------------------------------------------------------------------------------------------------------------------------------------------------------------------------------------------------------------------|-----------------|------------------------------------------------------------------------------------------------------------------------------------------------------------------------------------------------------------|-------------------------------------------------------------|------------------------------------|-------|
| <i>Eptesicus fuscus</i> ,<br><i>Lasiurus borealis</i> ,<br><i>Lasiurus cinereus</i> ,<br><i>Myotis lucifugus</i> ,<br><i>Perimyotis subflavus</i> ,<br><i>Lasionycteris noctivagans</i> ,<br>Unidentified                                                                                | Apr-Nov<br>2008 | Found 149 bat carcasses (primarily <i>Lasiurus borealis</i> , <i>L. cinereus</i> , <i>Lasionycteris noctivagans</i> ) at a 23-turbine facility. Estimated mortality of up to 784 bats annually. (5 events) | Casselman site, Somerset County, Pennsylvania, USA          | Arnett et al. 2009                 | S6-93 |
| <i>Eptesicus fuscus</i> ,<br><i>Lasiurus borealis</i> ,<br><i>Lasiurus cinereus</i> ,<br><i>Myotis lucifugus</i> ,<br><i>Lasionycteris noctivagans</i> ,<br>Unidentified                                                                                                                 | Jul-Oct 2008    | Found 241 bat carcasses (primarily <i>M. lucifugus</i> ) beneath 30 turbines at an 88-turbine facility. (5 events)                                                                                         | Fond du Lac County, Wisconsin                               | Gruver et al. 2009                 | S6-94 |
| <i>Lasiurus cinereus</i> ,<br><i>Myotis lucifugus</i> ,<br><i>Lasiurus borealis</i> ,<br><i>Eptesicus fuscus</i>                                                                                                                                                                         | 2008            | Found 10 bat carcasses at a 23-turbine facility. Estimated mortality of 67 bats annually. (1 event)                                                                                                        | Munnsville Farm, Madison and Oneida Counties, New York, USA | Stantec Consulting 2009b           | S6-95 |
| <i>Lasionycteris noctivagans</i> ,<br><i>Lasiurus cinereus</i>                                                                                                                                                                                                                           | 2008            | Found 50 bat carcasses in searches of 50 turbines at a 76-turbine facility. Estimated mortality of 249 bats annually. (2 events)                                                                           | Biglow Canyon, Wasco, Sherman County, Oregon USA            | Jeffrey et al. 2009                | S6-96 |
| <i>Lasionycteris noctivagans</i> ,<br><i>Lasiurus cinereus</i> ,<br><i>Myotis leibii</i> ,<br><i>Myotis lucifugus</i> ,<br><i>Myotis septentrionalis</i> ,<br><i>Perimyotis subflavus</i> ,<br><i>Lasiurus borealis</i> ,<br><i>Eptesicus fuscus</i> ,<br><i>Myotis</i> spp.,<br>Unknown | Jul-Oct 2008    | Found 116 bat carcasses in searches of all turbines at a 38-turbine facility. Estimated mortality of 487 bats during the study period. (3 events)                                                          | Ripley, Bruce County, Ontario, Canada                       | Jacques Whitford Stantech Ltd 2009 | S6-97 |

|                                                                                                                                                                                            |                                                           |                                                                                                                                                                                                                                          |                                                                            |                                |        |
|--------------------------------------------------------------------------------------------------------------------------------------------------------------------------------------------|-----------------------------------------------------------|------------------------------------------------------------------------------------------------------------------------------------------------------------------------------------------------------------------------------------------|----------------------------------------------------------------------------|--------------------------------|--------|
| <i>Lasionycteris noctivagans</i> ,<br><i>Lasiurus cinereus</i> ,<br><i>Myotis lucifugus</i> ,<br><i>Lasiurus borealis</i> ,<br><i>Eptesicus fuscus</i> ,<br><i>Myotis</i> spp.,<br>Unknown | Jul- Oct 2008<br>and 2009,<br>Apr-May<br>2009 and<br>2010 | Found 122 bat carcasses<br>(primarily <i>L. cinereus</i> ,<br><i>Lasionycteris noctivagans</i> )<br>beneath 29 searched wind<br>turbines at 1 facility with 86<br>turbines. Estimated annual<br>mortality of 2,227 bats. (5<br>events)   | Southeastern<br>Wisconsin, USA                                             | Grodsky <i>et al.</i><br>2012  | S6-98  |
| <i>Lasiurus cinereus</i> ,<br><i>Eptesicus fuscus</i> ,<br><i>Myotis lucifugus</i> ,                                                                                                       | May-Jun<br>2009                                           | Estimated mortality of 45 bats at<br>an 86-turbine facility during the<br>study period. (0 events)                                                                                                                                       | Wolfe Island,<br>Frontenac County,<br>Province of<br>Ontario, Canada       | Stantec<br>Consulting<br>2010a | S6-99  |
| <i>Lasiurus borealis</i> ,<br><i>Lasiurus cinereus</i> ,<br><i>Lasionycteris noctivagans</i> ,<br><i>Eptesicus fuscus</i> ,<br><i>Myotis lucifugus</i> ,<br>Unidentified                   | Jul-Dec 2009                                              | Found 180 bat carcasses<br>(primarily <i>L. borealis</i> , <i>L.</i><br><i>cinereus</i> , <i>L. noctivagans</i> ) during<br>searches of 86-turbine facility.<br>Estimated 1,270 bat fatalities<br>during the study period. (5<br>events) | Wolfe Island,<br>Frontenac County,<br>Ontario, Canada                      | Stantec<br>Consulting<br>2010b | S6-100 |
| <i>Lasiurus cinereus</i> ,<br><i>Lasionycteris noctivagans</i> ,<br>Unidentified                                                                                                           | Jun-Oct<br>2009                                           | Found 24 bat carcasses<br>(primarily <i>L. cinereus</i> ) in<br>searches of a subset of 30<br>turbines at a 90-turbine facility.<br>Estimated mortality of 648 bats<br>during study period. (1 event)                                    | Judith Gap Wind<br>Farm, Wheatland<br>County, Montana,<br>USA              | Poulton and<br>Erickson 2010   | S6-101 |
| <i>Lasiurus cinereus</i> ,<br><i>Lasionycteris noctivagans</i> ,<br><i>Eptesicus fuscus</i> ,<br><i>Myotis lucifugus</i>                                                                   | Apr-Oct<br>2009                                           | Estimated mortality of 80 bats at<br>38-turbine facility during study<br>period. (0 events)                                                                                                                                              | Stetson Mountain,<br>Penobscot and<br>Washington<br>Counties, Maine<br>USA | Stantec<br>Consulting<br>2009a | S6-102 |
| <i>Eptesicus fuscus</i> ,<br><i>Lasiurus borealis</i> ,<br><i>Lasiurus cinereus</i> ,                                                                                                      | Mar-May,<br>Jul-Nov 2009                                  | Found 89 bat carcasses<br>(primarily <i>L. cinereus</i> ) during<br>searches of 20 turbines at a 41-                                                                                                                                     | Cedar Ridge, Fond du<br>Lac County,<br>Wisconsin, USA                      | BHE 2011                       | S6-103 |

|                                                                                                                                                                                         |                                          |                                                                                                                                                                                     |                                                     |                           |        |
|-----------------------------------------------------------------------------------------------------------------------------------------------------------------------------------------|------------------------------------------|-------------------------------------------------------------------------------------------------------------------------------------------------------------------------------------|-----------------------------------------------------|---------------------------|--------|
| <i>Myotis lucifugus</i> ,<br><i>Lasionycteris noctivagans</i>                                                                                                                           |                                          | turbine facility. Estimated 2,072 bat fatalities during the study period. (5 events)                                                                                                |                                                     |                           |        |
| <i>Eptesicus fuscus</i> ,<br><i>Lasiurus borealis</i> ,<br><i>Lasiurus cinereus</i> ,<br><i>Myotis lucifugus</i> ,<br><i>Perimyotis subflavus</i> ,<br><i>Lasionycteris noctivagans</i> | Apr–Nov 2009, May-Jul 2010, Jul-Aug 2010 | Found 194 dead bats in 2009 and 282 in 2010 (primarily beneath 25 wind turbines) during an experiment to determine the efficacy of an ultrasonic deterrent. (12 events)             | Columbia and Schuylkill Counties, Pennsylvania, USA | Arnett <i>et al.</i> 2013 | S6-104 |
| <i>Lasiurus cinereus</i> ,<br><i>Lasionycteris noctivagans</i> ,<br><i>Myotis sp.</i>                                                                                                   | Sep 2009-Sep 2010                        | Found 17 dead bats in searches of 50 turbines at a 65-turbine facility. Estimated mortality of 405 bats annually. (1 event)                                                         | Biglow Canyon Phase II, Sherman County, Oregon USA  | Enk et al. 2011           | S6-105 |
| Unspecified                                                                                                                                                                             | Sep 2009-Nov 2010                        | Searched all turbines at a 30-turbine facility. Mean estimated mortality of 216 bats annually. (1 event)                                                                            | Dry Lake, Navajo County, Arizona USA                | Thompson and Bay 2012     | S6-106 |
| <i>Eptesicus fuscus</i> ,<br><i>Lasiurus borealis</i> ,<br><i>Lasiurus cinereus</i> ,<br><i>Myotis lucifugus</i> ,<br><i>Lasionycteris noctivagans</i>                                  | Mar-May, Jul-Oct 2010                    | Found 155 bat carcasses (primarily <i>L. borealis</i> ) during searches of 20 turbines at a 41-turbine facility. Estimated 1,633 bat fatalities during the study period. (5 events) | Cedar Ridge, Fond du Lac County, Wisconsin, USA     | BHE 2011                  | S6-107 |
| <i>Lasiurus borealis</i> ,<br><i>Lasionycteris noctivagans</i> ,<br><i>Eptesicus fuscus</i>                                                                                             | Jan-Jun 2010                             | Found 34 bat carcasses (primarily <i>L. noctivagans</i> ) during searches of 86-turbine facility. Estimated 450 bat fatalities during the study period. (1 event)                   | Wolfe Island, Frontenac County, Ontario, Canada     | Stantec Consulting 2011b  | S6-108 |
| <i>Lasiurus borealis</i> ,<br><i>Lasiurus cinereus</i> ,<br><i>Lasionycteris noctivagans</i> ,<br><i>Eptesicus fuscus</i>                                                               | Jul-Dec 2010                             | Found 111 bat carcasses (primarily <i>L. borealis</i> , <i>L. cinereus</i> , <i>L. noctivagans</i> ) during searches of 86-turbine facility.                                        | Wolfe Island, Frontenac County, Ontario, Canada     | Stantec Consulting 2011c  | S6-109 |

|                                                                                                                                                                                                                        |                       |                                                                                                                                                                                                                                                                                                                             |                                                                |                          |        |
|------------------------------------------------------------------------------------------------------------------------------------------------------------------------------------------------------------------------|-----------------------|-----------------------------------------------------------------------------------------------------------------------------------------------------------------------------------------------------------------------------------------------------------------------------------------------------------------------------|----------------------------------------------------------------|--------------------------|--------|
|                                                                                                                                                                                                                        |                       | Estimated 1,878 bat fatalities during the study period. (4 events)                                                                                                                                                                                                                                                          |                                                                |                          |        |
| <i>Lasiurus borealis</i> ,<br><i>Lasiurus cinereus</i> ,<br><i>Lasionycteris noctivagans</i> ,<br><i>Perimyotis subflavus</i> ,<br><i>Eptesicus fuscus</i> ,<br><i>Myotis lucifugus</i> ,<br><i>Myotis sodalis</i>     | Apr-Oct<br>2010       | Found 845 bat carcasses (primarily <i>L. borealis</i> , <i>L. cinereus</i> , <i>L. noctivagans</i> ) in searches of a subset of 136 turbines at a 355-turbine facility (includes incidental findings). Mean estimated mortality of 5,889 to 7,881 bats (depending on estimation method) during the study period. (4 events) | Fowler Ridge Wind Energy Facility, Benton County, Indiana, USA | Good et al. 2011         | S6-110 |
| <i>Lasiurus borealis</i> ,<br><i>Lasiurus cinereus</i> ,<br><i>Lasionycteris noctivagans</i> ,<br><i>Eptesicus fuscus</i> ,<br><i>Myotis lucifugus</i> ,<br><i>Myotis septentrionalis</i>                              | Apr-Oct<br>2010       | Found 63 bats at 17 searched turbines at two nearby facilities with a total of 50 turbines. Estimated mortality of 2,055 bats during study period. (3 events)                                                                                                                                                               | Cohocton and Dutch Hill, Steuben County, New York, USA         | Stantec Consulting 2011a | S6-111 |
| <i>Lasiurus borealis</i> ,<br><i>Lasiurus cinereus</i> ,<br><i>Lasionycteris noctivagans</i> ,<br><i>Lasiurus seminolus</i> ,<br><i>Perimyotis subflavus</i> ,<br><i>Eptesicus fuscus</i> ,<br><i>Myotis lucifugus</i> | Jul-Oct 2010          | Found 381 bat carcasses (primarily <i>L. borealis</i> and <i>L. cinereus</i> ) in searches of 24-25 turbines at a 132-turbine facility. Mean estimated mortality of 2,955 bats during the study period. (5 events)                                                                                                          | Mount Storm, Grant County, West Virginia, USA                  | Young et al. 2011a       | S6-112 |
| <i>Lasiurus cinereus</i> ,<br><i>Lasionycteris noctivagans</i>                                                                                                                                                         | Sep 2010-<br>Sep 2011 | Found six dead bats in searches of 50 turbines at a 65-turbine facility. Estimated mortality of 246 bats annually. (0 events)                                                                                                                                                                                               | Biglow Canyon Phase II, Sherman County, Oregon USA             | Enk et al. 2012          | S6-113 |

|                                                                                                                                                                                                                                                         |                   |                                                                                                                                                                                                                                                                                                               |                                                                |                          |        |
|---------------------------------------------------------------------------------------------------------------------------------------------------------------------------------------------------------------------------------------------------------|-------------------|---------------------------------------------------------------------------------------------------------------------------------------------------------------------------------------------------------------------------------------------------------------------------------------------------------------|----------------------------------------------------------------|--------------------------|--------|
| <i>Lasiurus cinereus</i> ,<br><i>Eptesicus fuscus</i>                                                                                                                                                                                                   | Jan-Jun 2011      | Estimated 41 bat fatalities during the study period. (0 events)                                                                                                                                                                                                                                               | Wolfe Island, Frontenac County, Ontario, Canada                | Stantec Consulting 2011d | S6-114 |
| <i>Lasiurus borealis</i> ,<br><i>Lasiurus cinereus</i> ,<br><i>Lasionycteris noctivagans</i> ,<br><i>Lasiurus seminolus</i> ,<br><i>Perimyotis subflavus</i> ,<br><i>Eptesicus fuscus</i> ,<br><i>Myotis lucifugus</i> ,<br><i>Nycticeius humeralis</i> | Apr-Oct 2011      | Found 573 bat carcasses (primarily <i>L. borealis</i> , <i>L. cinereus</i> , <i>L. noctivagans</i> ) in searches of a subset of 177 turbines at a 355-turbine facility (includes incidental findings). Mean estimated mortality of 9,152 to 12,106 bats (depending on estimation method) annually. (4 events) | Fowler Ridge Wind Energy Facility, Benton County, Indiana, USA | Good et al. 2012         | S6-115 |
| <i>Eptesicus fuscus</i> ,<br><i>Lasiurus cinereus</i> ,<br><i>Lasionycteris noctivagans</i> ,<br><i>Nyctinomops macrotis</i> ,<br><i>Tadarida brasiliensis</i>                                                                                          | Feb 2011-Feb 2012 | Found 29 bat carcasses in searches of all turbines at a 31-turbine facility. Mean estimated mortality of 188 bats annually. (1 event)                                                                                                                                                                         | Dry Lake, Navajo County, Arizona USA                           | Thompson & Bay 2012      | S6-116 |
| <i>Lasiurus borealis</i> ,<br><i>Lasiurus cinereus</i> ,<br><i>Lasionycteris noctivagans</i> ,<br><i>Perimyotis subflavus</i> ,<br><i>Eptesicus fuscus</i>                                                                                              | Apr-Jul 2011      | Found 62 bat carcasses (primarily <i>L. borealis</i> and <i>L. cinereus</i> ) in searches of 24 turbines at a 132-turbine facility. Mean estimated mortality of 185 bats during the study period. (2 events)                                                                                                  | Mount Storm, Grant County, West Virginia, USA                  | Young et al. 2011b       | S6-117 |
| <i>Lasiurus borealis</i> ,<br><i>Lasiurus cinereus</i> ,<br><i>Lasionycteris noctivagans</i> ,<br><i>Perimyotis subflavus</i> ,<br><i>Eptesicus fuscus</i>                                                                                              | Jul-Oct 2011      | Found 121 bat carcasses (primarily <i>L. borealis</i> and <i>L. cinereus</i> ) in searches of 24 turbines at a 132-turbine facility. Mean estimated mortality of 1,201 bats during the study period. (3 events)                                                                                               | Mount Storm, Grant County, West Virginia, USA                  | Young et al. 2012b       | S6-118 |

|                                                                                                                                                                                                                        |                 |                                                                                                                                                                                                                                |                                                                |                         |        |
|------------------------------------------------------------------------------------------------------------------------------------------------------------------------------------------------------------------------|-----------------|--------------------------------------------------------------------------------------------------------------------------------------------------------------------------------------------------------------------------------|----------------------------------------------------------------|-------------------------|--------|
| <i>Lasiurus borealis</i> ,<br><i>Lasiurus cinereus</i> ,<br><i>Lasionycteris noctivagans</i> ,<br><i>Lasiurus seminolus</i> ,<br><i>Perimyotis subflavus</i> ,<br><i>Eptesicus fuscus</i> ,<br><i>Myotis lucifugus</i> | Apr-Nov<br>2011 | Found 706 bat carcasses (primarily <i>L. borealis</i> , <i>L. cinereus</i> ) in searches of a subset of 14 turbines at a 28-turbine facility. Mean estimated mortality of 1,093 bats during study period. (6 events)           | Criterion, Garrett County, Maryland, USA                       | Young et al. 2012a      | S6-119 |
| <i>Lasiurus borealis</i> ,<br><i>Lasiurus cinereus</i> ,<br><i>Lasionycteris noctivagans</i> ,<br><i>Eptesicus fuscus</i>                                                                                              | Jul-Dec 2011    | Found 52 bat carcasses (primarily <i>L. borealis</i> , <i>L. cinereus</i> , <i>L. noctivagans</i> ) during searches of 86-turbine facility. Estimated 493 bat fatalities during the study period, 534 bats annually. (1 event) | Wolfe Island, Frontenac County, Ontario, Canada                | Stantec Consulting 2012 | S6-120 |
| <i>Lasiurus borealis</i> ,<br><i>Lasiurus cinereus</i> ,<br><i>Lasionycteris noctivagans</i> ,<br><i>Perimyotis subflavus</i>                                                                                          | Apr-Oct<br>2012 | Found 53 bat carcasses (primarily <i>L. borealis</i> ) during searches of a 67-turbine facility. Estimated 204 bat fatalities annually. (2 events)                                                                             | Beech Ridge, Greenbrier County, West Virginia USA              | Tidhar et al. 2013      | S6-121 |
| <i>Lasiurus borealis</i> ,<br><i>Lasiurus cinereus</i> ,<br><i>Lasionycteris noctivagans</i> ,<br><i>Perimyotis subflavus</i> ,<br><i>Eptesicus fuscus</i>                                                             | Apr–Nov<br>2012 | Found 82 bat carcasses (primarily <i>L. borealis</i> , <i>L. cinereus</i> ) in searches of a subset of 14 turbines at a 28-turbine facility. Mean estimated mortality of 546 bats during study period. (2 events)              | Criterion, Garrett County, Maryland, USA                       | Young et al. 2013       | S6-122 |
| <i>Lasiurus borealis</i> ,<br><i>Lasiurus cinereus</i> ,<br><i>Lasionycteris noctivagans</i> ,<br><i>Lasiurus seminolus</i> ,<br><i>Eptesicus fuscus</i> ,<br><i>Nycticeius humeralis</i>                              | Aug-Oct<br>2012 | Found 81 bat carcasses (primarily <i>L. borealis</i> , <i>L. cinereus</i> , <i>L. noctivagans</i> ) in searches of a subset of 118 turbines at a 355-turbine facility (includes incidental findings).                          | Fowler Ridge Wind Energy Facility, Benton County, Indiana, USA | Good et al. 2013        | S6-123 |

|                                                                                                                                                                                                                                                       |                      |                                                                                                                                                                         |                                             |                                                   |        |
|-------------------------------------------------------------------------------------------------------------------------------------------------------------------------------------------------------------------------------------------------------|----------------------|-------------------------------------------------------------------------------------------------------------------------------------------------------------------------|---------------------------------------------|---------------------------------------------------|--------|
|                                                                                                                                                                                                                                                       |                      | Mean estimated mortality of 1,755 bats annually. (3 events)                                                                                                             |                                             |                                                   |        |
| <i>Eptesicus fuscus</i> ,<br><i>Lasiurus borealis</i> ,<br><i>Lasiurus seminolus</i> ,<br><i>Lasionycteris noctivagans</i>                                                                                                                            | Jul–Oct 2012         | Found 12 bat carcasses (primarily <i>L. borealis</i> ) in 163 nights monitoring of 3 turbines at one facility. (1 event)                                                | Fowler, Indiana                             | Cryan et al. 2014                                 | S6-124 |
| <i>Lasiurus borealis</i> ,<br><i>Lasiurus cinereus</i> ,<br><i>Lasionycteris noctivagans</i> ,<br><i>Perimyotis subflavus</i> ,<br><i>Nycticeius humeralis</i> ,<br><i>Tadarida brasiliensis</i> ,<br>Unknown                                         | Jul-Oct 2009 to 2013 | Found 916 bat carcasses (primarily <i>Lasiurus borealis</i> and <i>L. cinereus</i> ) beneath 75 turbines at 1 facility during 13,604 standardized searches. (10 events) | North-central Texas, USA                    | Bennett & Hale 2014 See also Korstian et al. 2013 | S6-125 |
| <b>South America</b>                                                                                                                                                                                                                                  |                      |                                                                                                                                                                         |                                             |                                                   |        |
| <i>Lasiurus ega</i><br><i>Lasiurus blossevillii</i><br><i>Molossus molossus</i><br><i>Molossus rufus</i><br><i>Nyctinomops laticaudatus</i><br><i>Promops nasutus</i><br><i>Tadarida brasiliensis</i> ,<br><i>Lasiurus cinereus</i> ,<br>Unidentified | Jul 2006-Jun 2009    | 336 dead bats found in searches at a 75 turbine facility carried out during 3 years (4 events)                                                                          | Osório Wind Farm, Rio Grande de Sul, Brazil | Barros et al. 2015                                | S6-126 |
