# Supplementary material
Source: PubMed Central journal article supplement (PMC5942905)
Supplement: NIHMS934046-supplement-Supp_AppendixS7.pdf [file NIHMS934046-supplement-Supp_AppendixS7.pdf]

Supplemental Information “Multiple Mortality Events in Bats: A Global Review”, *Mammal Review* 2016, O’Shea, Cryan, Hayman, Plowright, Streicker.

We provide summaries of pertinent details regarding multiple mortality events of bats in a series of nine appendices. Appendix S10 lists all references cited in Appendices S1-S9. Events are given by region alphabetically, then chronologically within regions. The number of events entered into tallies are given in parentheses under the “Description” column. We attempted to be conservative in designating numbers of events. Unfortunately not all sources provide enough information to allow accurate judgments in each case. Generally we considered events extending over multiple years as one event per year, and events observed at more than one dispersed location as separate events. We considered events impacting more than one species of bat as separate events for each species, unless there was insufficient information on numbers per species. Events with insufficient information for each species were treated as single events. Scientific names follow Simmons (2005) in Wilson and Reeder’s (2005) *Mammal Species of the World*, 3<sup>rd</sup> edition (<http://www.vertebrates.si.edu/msw/mswcfapp/msw/index.cfm>), with the exceptions of *Myotis escalerai* (Ibáñez *et al.* 2006), *Perimyotis subflavus*, and *Parastrellus hesperus* (Hooper *et al.* 2006).

**Appendix S7.** Reports of multiple bat deaths due to or suggestive of infectious viral or bacterial disease. (See Table S8 for reports of the fungal disease white-nose syndrome).

| Region and Species           | Date     | Description                                                                                                                                                                                   | Location                         | Source                     | Case |
|------------------------------|----------|-----------------------------------------------------------------------------------------------------------------------------------------------------------------------------------------------|----------------------------------|----------------------------|------|
| <i>Africa</i>                |          |                                                                                                                                                                                               |                                  |                            |      |
| <i>Epomophorus wahlbergi</i> | 1980     | Lagos bat virus suspected as cause of a “significant mortality” event involving sick and dying bats. 10-15% of several hundred bats examined confirmed as infected with this virus. (1 event) | Near Durban, Natal, South Africa | King <i>et al.</i> 1994    | S7-1 |
| <i>Asia</i>                  |          |                                                                                                                                                                                               |                                  |                            |      |
| <i>Chaerephon plicatus</i>   | Nov 2000 | 12 dead bats found in cave, infected with Kaeng Khoi virus, a bunyavirus. (1 event)                                                                                                           | Near Kampot, Cambodia            | Osborne <i>et al.</i> 2003 | S7-2 |
|                              |          |                                                                                                                                                                                               |                                  |                            |      |

|                                 |             |                                                                                                                                                                                                                                                                                                                                                                                                                                                                                                                                                                                    |                                                                                  |                      |      |
|---------------------------------|-------------|------------------------------------------------------------------------------------------------------------------------------------------------------------------------------------------------------------------------------------------------------------------------------------------------------------------------------------------------------------------------------------------------------------------------------------------------------------------------------------------------------------------------------------------------------------------------------------|----------------------------------------------------------------------------------|----------------------|------|
| <b><i>Australia</i></b>         |             |                                                                                                                                                                                                                                                                                                                                                                                                                                                                                                                                                                                    |                                                                                  |                      |      |
| <i>Pteropus poliocephalus</i>   | 1978        | Mass abortion of near-term fetuses, several thousand out of 12,000 adults. Disease suspected but no confirmatory evidence. (1 event)                                                                                                                                                                                                                                                                                                                                                                                                                                               | Beenleigh, Queensland, Australia                                                 | Hall & Richards 2000 | S7-3 |
| <i>Pteropus poliocephalus</i>   | 1983        | Mass abortions similar to Beenleigh event above. (1 event)                                                                                                                                                                                                                                                                                                                                                                                                                                                                                                                         | Indoorophily Island, near Brisbane, Queensland, Australia                        | Hall & Richards 2000 | S7-4 |
| <b><i>Europe</i></b>            |             |                                                                                                                                                                                                                                                                                                                                                                                                                                                                                                                                                                                    |                                                                                  |                      |      |
| <i>Miniopterus schreibersii</i> | Summer 2002 | Pathological and virological analysis showed that carcasses of 6 bats sampled at Cueva del Lloviu in northern Spain lacked gross pathology but had histopathological lesions consistent with viral pneumonia. A new filovirus was reported from 20 bats (primarily from lungs) based on PCR, but no other of multiple viruses screened were reported. 5 dead bats from Cantabria in northern Spain also had the filovirus, but 45 healthy <i>M. schreibersii</i> sampled at Cantabria after the die-off had no filovirus. Nine dead <i>Myotis myotis</i> found at Cantabria lacked | Cueva del Lloviu, Asturias, and unspecified caves near Cantabria, northern Spain | Negredo et al. 2011  | S7-5 |

|                                                    |              |                                                                                                                                                                                                                                                                                                                                    |                                        |                         |      |
|----------------------------------------------------|--------------|------------------------------------------------------------------------------------------------------------------------------------------------------------------------------------------------------------------------------------------------------------------------------------------------------------------------------------|----------------------------------------|-------------------------|------|
|                                                    |              | filovirus, as did 1,295 bats of 29 species sampled throughout Spain. (2 events)                                                                                                                                                                                                                                                    |                                        |                         |      |
| <b>Islands</b>                                     |              |                                                                                                                                                                                                                                                                                                                                    |                                        |                         |      |
| <i>Pteropus samoensis</i><br>or <i>P. tonganus</i> | 1839         | “...after a serious outbreak of an epidemic had successively attacked both Europeans and natives, as well as animals also, it seized upon the bats, or flying foxes, and devastated them in great numbers” (Stair 1897, p 188-189). (1 event)                                                                                      | Samoa                                  | Stair 1887              | S7-6 |
| <i>Pteropus samoensis</i><br>or <i>P. tonganus</i> | 1890s        | Avian cholera (Pasteurellosis) intentionally introduced to kill fruit bats by German farmers, “was apparently successful in killing many”, but unintentionally killed domestic fowl as well. (1 event)                                                                                                                             | ‘Upolo, Samoa                          | Spennemann & Wiles 2002 | S7-7 |
| <i>Pteropus mariannus</i>                          | 1926 or 1927 | “They are scarce indeed. Since 1927 after an epidemic of measles and dysentery among the native population. The flying foxes of the island died in thousands so that now it is very doubtful whether there are a dozen specimens to be found.” (Coultas 1931, p. 65); “an epidemic broke out among these mammals which practically | Kosrae, Federated States of Micronesia | Coultas 1931            | S7-8 |

|                               |                            |                                                                                                                                                                                                                                                            |                                                    |                                                       |       |
|-------------------------------|----------------------------|------------------------------------------------------------------------------------------------------------------------------------------------------------------------------------------------------------------------------------------------------------|----------------------------------------------------|-------------------------------------------------------|-------|
|                               |                            | wiped out the race...The island is overrun with rats, but at the time I was there an epidemic seemed to have broken out among them also as numbers of dead individuals could be found lying on the ground.” (Coultas 1931, p. 246) (1 event)               |                                                    |                                                       |       |
| <i>Pteropus tonganus</i>      | Unspecified, prior to 1949 | “Mr. Dods had told me how numerous they were about Savu Savu until some epidemic decimated them and hundreds of bleaching skeletons lay beneath each bat-roost in the forest.” (Degener 1949, p.79) (1 event)                                              | Vanu Levu, Fiji                                    | Degener 1949                                          | S7-9  |
| <i>Pteropus neohibernicus</i> | 1985                       | Many found dead or dying from disease beneath large and well-known roosts over several weeks throughout the island. Bats changed from common to rare in abundance. (1 event)                                                                               | Manus Island, Admiralty Islands, Papua, New Guinea | Flannery 1989                                         | S7-10 |
| <i>Pteropus rayneri</i>       | 1987                       | Reports of mass die-off thought to be similar to deaths of <i>P. neohibernicus</i> on Manus (above) in 1985. However, in a subsequent die-off in 1994 (see Table S3) Bowen-Jones <i>et al.</i> (1997) suggest an influence of invasive red ants. (1 event) | Bougainville and Buka, Solomon Islands             | Flannery 1989, but see Bowen-Jones <i>et al.</i> 1997 | S7-11 |

| <i>North America</i>         |                        |                                                                                                                                                                                                                                                                                                  |                                              |                                                             |       |
|------------------------------|------------------------|--------------------------------------------------------------------------------------------------------------------------------------------------------------------------------------------------------------------------------------------------------------------------------------------------|----------------------------------------------|-------------------------------------------------------------|-------|
| <i>Tadarida brasiliensis</i> | Aug 1955               | 11 of 20 dead were “infected with rabies”. Several thousand bats died. Ruled out DDT based on residue analysis (but not based on diagnostic residues in brains; subsequent analyses suggest DDT played a role). (1 event)                                                                        | Carlsbad Caverns, New Mexico, USA            | Constantine 1967, Constantine <i>et al</i> 1968, Clark 2001 | S7-12 |
| <i>Tadarida brasiliensis</i> | Aug 1956               | Collected 2,228 dead bats, 88 confirmed rabid. The 1956 epizootic was associated with migration during inclement weather and unfavourably cool temperatures in the caves due to the presence of relatively few bats producing body heat; subsequent analyses suggest DDT played a role (1 event) | Carlsbad Caverns, New Mexico, USA            | Constantine 1967, Constantine <i>et al</i> 1968, Clark 2001 | S7-13 |
| <i>Tadarida brasiliensis</i> | Summer and autumn 1957 | 29 of 48 sick and dying bats confirmed rabid during a year with normal weather. (1 event)                                                                                                                                                                                                        | Carlsbad Caverns, New Mexico, USA            | Constantine 1967                                            | S7-14 |
| <i>Tadarida brasiliensis</i> | Jun-Oct 1993           | 17 of 23 dead or dying bats from 4 roosts in adjacent buildings diagnosed as rabid. Colony size not estimated. (1 event)                                                                                                                                                                         | Mineral Wells, Palo Pinto County, Texas, USA | Clark <i>et al.</i> 1996                                    | S7-15 |
| <i>Parastrellus hesperus</i> | Jul-Aug 2001           | 38 dead bats, rabies. (1 event)                                                                                                                                                                                                                                                                  | Death Valley National Park, California, USA  | U.S. Geological Survey 2015c                                | S7-16 |

|                                |              |                                                                                                                                                     |                                              |                              |       |
|--------------------------------|--------------|-----------------------------------------------------------------------------------------------------------------------------------------------------|----------------------------------------------|------------------------------|-------|
| <i>Tadarida brasiliensis</i>   | Summer 2004  | 70 of 81 bats found on the ground below a colony of 750,000 at a bridge diagnosed as rabid. (1 event)                                               | Travis County, TX                            | Davis <i>et al.</i> 2012     | S7-17 |
| <i>Tadarida brasiliensis</i>   | Summer 2005  | 226 of 240 bats found on the ground below a colony of 750,000 at a bridge diagnosed as rabid. (1 event)                                             | Travis County, TX                            | Davis <i>et al.</i> 2012     | S7-18 |
| <i>Myotis volans</i>           | Sep 2007     | 24 dead bats, rabies. (1 event)                                                                                                                     | Lane County, Oregon, USA                     | U.S. Geological Survey 2015c | S7-19 |
| <i>Eptesicus fuscus</i>        | Summer 2008  | About 100 bats found dead during a four-week period. Bacterial isolation and associated pathology implicated pasteurellosis as the cause. (1 event) | Winnebago County, Wisconsin, USA             | Blehert <i>et al.</i> 2014   | S7-20 |
| <i>Corynorhinus townsendii</i> | Jul 2009     | 11 dead bats, rabies and emaciation. (1 event)                                                                                                      | Silver Falls State Park, Oregon, USA         | U.S. Geological Survey 2015c | S7-21 |
| <i>Tadarida brasiliensis</i>   | Aug 2010     | 2,000 dead bats, rabies. (1 event)                                                                                                                  | McNeil Bridge, Williamson County, Texas, USA | U.S. Geological Survey 2015c | S7-22 |
| <i>Eptesicus fuscus</i>        | Jun-Jul 2012 | 15 dead bats, rabies. (1 event)                                                                                                                     | Moore County, North Carolina, USA            | U.S. Geological Survey 2015c | S7-23 |
| <i>Myotis lucifugus</i>        | Feb 2015     | Ca. 2,000 bats dead, bronchopneumonia, pulmonary congestion, etiology not yet specified. (1 event)                                                  | Pierce County, Wisconsin USA                 | U.S. Geological Survey 2015b | S7-24 |
