# Supplementary material
Source: PubMed Central journal article supplement (PMC5942905)
Supplement: NIHMS934046-supplement-Supp_AppendixS9.pdf [file NIHMS934046-supplement-Supp_AppendixS9.pdf]

Supplemental Information “Multiple Mortality Events in Bats: A Global Review”, *Mammal Review* 2016, O’Shea, Cryan, Hayman, Plowright, Streicker.

We provide summaries of pertinent details regarding multiple mortality events of bats in a series of nine appendices. Appendix S10 lists all references cited in Appendices S1-S9. Events are given by region alphabetically, then chronologically within regions. The number of events entered into tallies are given in parentheses under the “Description” column. We attempted to be conservative in designating numbers of events. Unfortunately not all sources provide enough information to allow accurate judgments in each case. Generally we considered events extending over multiple years as one event per year, and events observed at more than one dispersed location as separate events. We considered events impacting more than one species of bat as separate events for each species, unless there was insufficient information on numbers per species. Events with insufficient information for each species were treated as single events. Scientific names follow Simmons (2005) in Wilson and Reeder’s (2005) *Mammal Species of the World*, 3<sup>rd</sup> edition (<http://www.vertebrates.si.edu/msw/mswcfapp/msw/index.cfm>), with the exceptions of *Myotis escalerae* (Ibáñez *et al.* 2006), *Perimyotis subflavus*, and *Parastrellus hesperus* (Hoofer *et al.* 2006).

**Appendix S9.** Reports of multiple bat deaths due to unexplained causes.

| Region and Species              | Date         | Description                                                                                                                                         | Location                                      | Source                    | Case |
|---------------------------------|--------------|-----------------------------------------------------------------------------------------------------------------------------------------------------|-----------------------------------------------|---------------------------|------|
| <b>Australia</b>                |              |                                                                                                                                                     |                                               |                           |      |
| <i>Miniopterus schreibersii</i> | 1964, 1965   | “Large numbers” of dead bats, especially juveniles. (2 events)                                                                                      | Lake Gilleear Guano Cave, Victoria, Australia | Hamilton-Smith 1967       | S9-1 |
| <i>Miniopterus schreibersii</i> | 1967         | “A large number” of dead young (but less than 200). Author hypothesizes insecticides, or “natural causes related to population pressure”. (1 event) | Three caves in Victoria and South Australia   | Hamilton-Smith 1967       | S9-2 |
| <b>Europe</b>                   |              |                                                                                                                                                     |                                               |                           |      |
| <i>Miniopterus schreibersii</i> | Ca. Apr 1982 | About 500 found dead; DDT group residues found but not conclusive of mortality. Stress                                                              | Acqua Fitusa Cave, Sicily, Italy              | Corrao <i>et al.</i> 1985 | S9-3 |

|                                 |              |                                                                                                                                                                                                                                                                                                          |                                                          |                           |      |
|---------------------------------|--------------|----------------------------------------------------------------------------------------------------------------------------------------------------------------------------------------------------------------------------------------------------------------------------------------------------------|----------------------------------------------------------|---------------------------|------|
|                                 |              | due to spring migration speculated as a factor. (1 event)                                                                                                                                                                                                                                                |                                                          |                           |      |
| <i>Myotis myotis</i>            | Ca. Apr 1982 | About 100 found dead; DDT group residues found but not conclusive of mortality. Stress due to spring migration speculated as a factor. (1 event)                                                                                                                                                         | Acqua Fitusa Cave, Sicily, Italy                         | Corrao <i>et al.</i> 1985 | S9-4 |
| <i>Miniopterus schreibersii</i> | July 1992    | 100 carcasses found, mostly juveniles. Pesticide mortality suspected but chemical analysis inconclusive. (1 event)                                                                                                                                                                                       | Unspecified location, Portugal                           | Roué & Némoz 2002         | S9-5 |
| <i>Miniopterus schreibersii</i> | May 2002     | 70 carcasses found in 5 local gardens along the river. Calculated that perhaps 2000 bats died in area. First speculated pesticide poisoning because of timing coinciding with applications, but then suggested perhaps event may be part of possible epizootic reported below and in Table S7. (1 event) | Charentes River, St. Savinien, Charente-Maritime, France | Jourde 2003               | S9-6 |
| <i>Miniopterus schreibersii</i> | Summer 2002  | 10 or more adult and young carcasses (up to 700) found at nine caves. Impaired reproduction also noted. Very few sampled for histological or microbiological analysis, and results not conclusive. Other species not affected. Similar events at two locations in northern Spain suggestive of           | Multiple roosts in France                                | Roué & Némoz 2002         | S9-7 |

|                                 |             |                                                                                                                                                                                                                                                                     |                                   |                                                              |       |
|---------------------------------|-------------|---------------------------------------------------------------------------------------------------------------------------------------------------------------------------------------------------------------------------------------------------------------------|-----------------------------------|--------------------------------------------------------------|-------|
|                                 |             | viral pneumonia perhaps due to filovirus (see Table S7). (9 events)                                                                                                                                                                                                 |                                   |                                                              |       |
| <i>Miniopterus schreibersii</i> | Summer 2002 | Multiple deaths reported at 6 locations in Portugal. Four carcasses submitted for laboratory analysis but results unremarkable. Similar events at two locations in northern Spain suggestive of viral pneumonia perhaps due to filovirus (see Table S7). (6 events) | Multiple roosts in Portugal       | Roué & Némoz 2002                                            | S9-8  |
| <i>Miniopterus schreibersii</i> | Summer 2002 | Multiple deaths (up to 1,400) reported at 11 roosts in southern Spain. Microbiological results on small sample unremarkable. Similar events at two locations in northern Spain suggestive of viral pneumonia perhaps due to filovirus (see Table S7). (11 events)   | Multiple roosts in southern Spain | Roué & Némoz 2002, Quetglas <i>et al.</i> 2003, DeLucas 2007 | S9-9  |
| <b>Islands</b>                  |             |                                                                                                                                                                                                                                                                     |                                   |                                                              |       |
| <i>Pteropus rayneri</i>         | 1994        | “In Kolokopisi Choiseul chief said within a week or so in 1994 the large colony ‘thousands strong’ fell down from the trees. Authors suggest invasive red ants may be involved. (1 event)                                                                           | Choiseul, Solomon Islands         | Bowen-Jones <i>et al.</i> 1997                               | S9-10 |

|                                                                                        |               |                                                                                                                                                                                                                                                                                  |                                                          |                              |       |
|----------------------------------------------------------------------------------------|---------------|----------------------------------------------------------------------------------------------------------------------------------------------------------------------------------------------------------------------------------------------------------------------------------|----------------------------------------------------------|------------------------------|-------|
| <i>Pteronotus quadridens</i>                                                           | Mar 2008      | 20 dead bats found, emaciated. (1 event)                                                                                                                                                                                                                                         | Culebrones, Puerto Rico                                  | U.S. Geological Survey 2015c | S9-11 |
| <b>North America</b>                                                                   |               |                                                                                                                                                                                                                                                                                  |                                                          |                              |       |
| <i>Mormoops megalophylla</i>                                                           | Jul-Aug 1954  | Hundreds of thousands of dead bats, thought died in Jul or Aug but not discovered until November. (2 events)                                                                                                                                                                     | Cueva de Diablo and Jesus Maria mine, Nuevo Leon, Mexico | Villa-R. 1955                | S9-12 |
| <i>Myotis velifer</i>                                                                  | 1958          | Numerous mummified carcasses in cave “perhaps reaching several thousand”. (1 event)                                                                                                                                                                                              | Valdina Farms Sinkhole, Medina County, Texas, USA        | Raun 1960                    | S9-13 |
| <i>Tadarida brasiliensis</i>                                                           | Late Jul 1962 | Hundreds stricken, suspected to be due to cool weather conditions. Rabies not implicated. (1 event)                                                                                                                                                                              | Tunnel, Kendall County, Texas, USA                       | Constantine 1967             | S9-14 |
| <i>Tadarida brasiliensis</i>                                                           | Late Jul 1962 | Hundreds stricken, suspected to be due to cool weather conditions. Rabies not implicated. (1 event)                                                                                                                                                                              | Frio Cave, Uvalde County, Texas, USA                     | Constantine 1967             | S9-15 |
| <i>Tadarida brasiliensis</i>                                                           | Dec 1963      | Hundreds of thousands of dead and dying bats on the cave floor. (1 event)                                                                                                                                                                                                        | Cave near Ciudad Mante, Tamaulipas, Mexico               | Booth 1965                   | S9-16 |
| <i>Myotis grisescens</i> ,<br><i>Myotis lucifugus</i> ,<br><i>Perimyotis subflavus</i> | 1965          | “Dozens of bats dead and dying” (over 100) in two caves. Author includes pesticide poisoning as possible explanation, but only limited pesticide data were provided. Clark (1981) suggested organochlorine poisoning during spring fat depletion as a possible cause. (2 events) | Missouri, USA                                            | Davis 1965                   | S9-17 |

|                              |              |                                                                                                                                                                                                                                                                                                                                                                                            |                                         |                                                            |       |
|------------------------------|--------------|--------------------------------------------------------------------------------------------------------------------------------------------------------------------------------------------------------------------------------------------------------------------------------------------------------------------------------------------------------------------------------------------|-----------------------------------------|------------------------------------------------------------|-------|
| <i>Tadarida brasiliensis</i> | 1968         | Hillside outside cave “covered with dead or dying bats”. Pesticide poisoning speculated as a factor. (1 event)                                                                                                                                                                                                                                                                             | Cave southeast of Carbo, Sonora, Mexico | E. Studier, pers comm in Cockrum 1969, 1970                | S9-18 |
| <i>Tadarida brasiliensis</i> | 1968         | Dead bats found in local agricultural fields. “Negative for rabies”. Colony in cave declined from 25 million bats in 1963 to 30,000 in 1969; not examined for diagnostic organochlorine pesticide residues; interpretation by Clark (1986) and Clark and Shore (2001) suggest an organophosphate such as methyl parathion (perhaps together with DDT) may have been responsible. (1 event) | Fields near Eagle Creek Cave, Arizona   | Cockrum 1970, Reidinger & Cockrum 1978, Clark & Shore 2001 | S9-19 |
| <i>Tadarida brasiliensis</i> | Sep 1971     | “Several thousand infant bats were found dead on the floor beneath the roost area”. (1 event)                                                                                                                                                                                                                                                                                              | Carlsbad Caverns, New Mexico, USA       | Altenbach <i>et al.</i> 1979                               | S9-20 |
| <i>Myotis lucifugus</i>      | Jun-Aug 2009 | 45 dead bats, undetermined. (1 event)                                                                                                                                                                                                                                                                                                                                                      | Hunterdon County, New Jersey, USA       | U.S. Geological Survey 2015c                               | S9-21 |
| Unidentified                 | Jul 2009     | 20 dead bats, undetermined. (1 event)                                                                                                                                                                                                                                                                                                                                                      | Ferry County, Washington, USA           | U.S. Geological Survey 2015c                               | S9-22 |
| Unidentified                 | 13 Jun 2010  | 10 dead bats, undetermined. (1 event)                                                                                                                                                                                                                                                                                                                                                      | Montgomery County, Virginia             | U.S. Geological Survey 2015c                               | S9-23 |
| <i>Myotis lucifugus</i>      | Jul 2010     | 20 dead bats, undetermined. (1 event)                                                                                                                                                                                                                                                                                                                                                      | Garrison Dam, North Dakota, USA         | U.S. Geological Survey 2015c                               | S9-24 |

|                                                                                   |              |                                                           |                                      |                              |       |
|-----------------------------------------------------------------------------------|--------------|-----------------------------------------------------------|--------------------------------------|------------------------------|-------|
| <i>Myotis lucifugus</i>                                                           | Jul 2010     | 80 dead bats, undetermined. (1 event)                     | Walla Walla County, Washington, USA  | U.S. Geological Survey 2015c | S9-25 |
| <i>Myotis lucifugus</i>                                                           | Jun-Jul 2008 | 10 dead bats, emaciation. (1 event)                       | Wisconsin Rapids, Wisconsin, USA     | U.S. Geological Survey 2015c | S9-26 |
| <i>Myotis volans</i>                                                              | Aug 2008     | 50 dead bats, emaciation. (1 event)                       | Lewis and Clark County, Montana, USA | U.S. Geological Survey 2015c | S9-27 |
| <i>Myotis lucifugus</i> ,<br><i>Eptesicus fuscus</i>                              | Jun-Jul 2009 | 190 dead bats, emaciation. (2 events)                     | Indiana, USA                         | U.S. Geological Survey 2015c | S9-28 |
| <i>Corynorhinus townsendii</i> , <i>Myotis evotis</i> , <i>Myotis ciliolabrum</i> | Aug 2009     | 11 dead bats, emaciation. (1 event)                       | Hubbard Cave, Colorado, USA          | U.S. Geological Survey 2015c | S9-29 |
| <i>Eptesicus fuscus</i>                                                           | Jun 2010     | 25 dead bats, emaciation. (1 event)                       | Connecticut, USA                     | U.S. Geological Survey 2015c | S9-30 |
| <i>Nycticeius humeralis</i>                                                       | Jun-Jul 2010 | 50 dead bats, emaciation, parasitism, external. (1 event) | Newport News County, Virginia, USA   | U.S. Geological Survey 2015c | S9-31 |
| <i>Nycticeius humeralis</i>                                                       | Jun-Jul 2013 | 20 bats dead, external parasites, emaciation. (1 event)   | Fort Eustis, Virginia, USA           | U.S. Geological Survey 2015c | S9-32 |
| <i>Myotis lucifugus</i>                                                           | Aug 2013     | 11 dead bats, emaciated. (1 event)                        | Blue Earth County, Minnesota, USA    | U.S. Geological Survey 2015c | S9-33 |
| <i>Tadarida brasiliensis</i>                                                      | Feb 2011     | 55 dead bats, cause undetermined (1 event)                | Tucson, Arizona, USA                 | U.S. Geological Survey 2015c | S9-34 |
| <i>Myotis yumanensis</i> ,<br>Unidentified                                        | Mar-May 2011 | 22 dead bats, cause undetermined (1 event)                | Eddy County, New Mexico, USA         | U.S. Geological Survey 2015c | S9-35 |

|                                                             |              |                                                        |                                                  |                              |       |
|-------------------------------------------------------------|--------------|--------------------------------------------------------|--------------------------------------------------|------------------------------|-------|
|                                                             |              |                                                        |                                                  |                              |       |
| <i>Nycticeius humeralis</i>                                 | Jun 2011     | 10 carcasses, emaciated, cause undetermined. (1 event) | Newport News, Virginia, USA                      | U.S. Geological Survey 2015c | S9-36 |
| <i>Myotis lucifugus</i> ,<br><i>Myotis septentrionalis</i>  | Jun-Jul 2011 | 40 carcasses, cause undetermined. (1 event)            | Bremer County, Iowa, USA                         | U.S. Geological Survey 2015c | S9-37 |
| <i>Myotis lucifugus</i>                                     | Jun-Jul 2011 | 37 carcasses, emaciated, cause undetermined. (1 event) | Paulding County, Ohio, USA                       | U.S. Geological Survey 2015c | S9-38 |
| <i>Myotis lucifugus</i> ,<br><i>Parastrellus hesperus</i>   | Aug 2011     | 11 dead, cause undetermined. (1 event)                 | Donnelly, Idaho, USA                             | U.S. Geological Survey 2015c | S9-39 |
| Unidentified bats                                           | May 2012     | 30 decomposed carcasses, cause undetermined. (1 event) | Jefferson County, Indiana, USA                   | U.S. Geological Survey 2015c | S9-40 |
| <i>Myotis lucifugus</i>                                     | Jul 2013     | 18 dead bats, unknown causes. (1 event)                | Snake River, Idaho, USA                          | U.S. Geological Survey 2015c | S9-41 |
| <i>Antrozous pallidus</i> ,<br><i>Tadarida brasiliensis</i> | Jun-Jul 2014 | 60 dead bats, emaciated. (2 events)                    | Tucson, Arizona, USA                             | U.S. Geological Survey 2015c | S9-42 |
| <i>Eptesicus fuscus</i>                                     | Jul-Aug 2014 | 70 dead bats, emaciation. (1 event)                    | Old Forestville Historic Village, Minnesota, USA | U.S. Geological Survey 2015c | S9-43 |
| <i>Nycticeius humeralis</i>                                 | Jul-Aug 2014 | 12 dead bats, emaciation. (1 event)                    | Fort Eustis, Virginia, USA                       | U.S. Geological Survey 2015c | S9-44 |
| <i>Myotis lucifugus</i>                                     | Feb 2015     | Ca. 2,000 bats dead, bronchopneumonia, pulmonary       | Pierce County, Wisconsin USA                     | U.S. Geological Survey 2015b | S9-45 |

|  |  |                                               |  |  |  |
|--|--|-----------------------------------------------|--|--|--|
|  |  | congestion, etiology<br>unspecified (1 event) |  |  |  |
|--|--|-----------------------------------------------|--|--|--|
