# Supplementary material
Source: PubMed Central journal article supplement (PMC5942905)
Supplement: NIHMS934046-supplement-Supp_AppendixS10.pdf [file NIHMS934046-supplement-Supp_AppendixS10.pdf]

**Appendix S10.** Literature cited for Appendices S1-S9. “Multiple Mortality Events In Bats: A Global Review”, *Mammal Review* 2016, O’Shea, Cryan, Hayman, Plowright, Streicker.

Ahlen I (2003) *Wind turbines and bats – a pilot study*. Final Report. Dnr 5210P-2002-00473, P-nr P20272-1. Swedish National Energy Administration. Available at <http://docs.wind-watch.org/Ahlen-windturbines-bats-2003.pdf> Accessed 22 December 2014.

Ahlén I (2002) Fladdermöss och fåglar dödade av vindkraftverk [Bats and birds killed by wind power turbines]. *Fauna och Flora* 97: 14-21.

Altenbach JS, Geluso KN, Wilson DE (1979) Population size of *Tadarida brasiliensis* at Carlsbad Caverns in 1973. In: Genoways HH, Baker RJ (eds) *Biological investigations in the Guadalupe Mountains National Park, Texas*, 341-348. Proceedings and Transactions Series 4, National Park Service, Washington, DC, USA

Alves P, Geraldés P, Ferraz C, Silva B, Hortêncio M, Amorim F, Barreiro, S (2007) Parque Eólico de Arada/Montemuro. Monitorização de Quirópteros: Relatório 2 – Ano 2006. *Plecotus*, Lda e Prosistemas, SA

Amman BR, Nyakarahuka L, McElroy AK, Dodd KA, Sealy TK, Schuh AJ et al. (2014) Marburgvirus resurgence in Kitaka Mine bat population after extermination attempts, Uganda. *Emerging Infectious Diseases* 20: 1761-1764.

Amorim F (2009) *Morcegos e Parques Eólicos - Relação entre o uso do espaço e a mortalidade, avaliação de metodologias, e influência de factores ambientais e ecológicos sobre a mortalidade*. Tese de Mestrado, Universidade de Évora.

Amorim F, Rebelo H, Rodrigues L (2012) Factors influencing bat activity and mortality at a wind farm in the Mediterranean region. *Acta Chiropterologica* 14: 439-457.

Ancillotto L, Serangeli MT, Russo D (2013) Curiosity killed the bat: Domestic cats as bat predators. *Mammalian Biology* 78: 369– 373.

Andrianaivoarivelo RA, Ramilijaona OR, Andriafidison D (2007) *Rousettus madagascariensis* Grandidier 1929 feeding on *Dimocarpus longan* in Madagascar. *African Bat Conservation News* 11: 3-4.

Anonymous (1987). Thornhill Cave bat killers convicted. *Bats* 5: 2.

Anonymous (1989). The Fight for Mt. Etna. *Bats* 7. Available at <http://www.batcon.org/index.php/media-and-info/bats-archives.html?task=viewArticle&magArticleID=393>

Anonymous (1991). Arizona Bat Colony Vandals Apprehended. *Bats* 9. Available at <http://www.batcon.org/index.php/media-and-info/bats-archives.html?task=viewArticle&magArticleID=518>

Anonymous (2010a) Killing bats leads to jail. *Bats* 28:13.

Anonymous (2010b) Beautiful batty babes. *Brisbane Bat Chatter* 9: 1

Anonymous (2010c) Heat takes toll on bats, 400 die. Times of India Ahmedabad. Available at: <http://timesofindia.indiatimes.com/city/ahmedabad/Heat-takes-toll-on-bats-400-die/articleshow/5964096.cms> Accessed 26 May 2015

Anonymous (2012) Saving dawn bats from nets. *Bats* 30: 13.

Anonymous (2013) Roost rounduo. Perrin Park, Toowong. Bat Chatter, Bat Conservation and Rescue Queensland 23: 20.

Anonymous (2014) Roost roundup. Bat Chatter, Bat Conservation and Rescue Queensland. 23: 21.

Anonymous (2015) Dying bats dropping from trees amid heatwave in Bhopal. Getty Images and Hindustan Times. Available at: <http://www.gettyimages.co.uk/detail/news-photo/dead-bat-lying-on-the-roadside-after-falling-from-trees-news-photo/474119594> Accessed 26 May 2015.

Arellano-Sota C (1988) Biology, ecology, and control of the vampire bat. *Reviews of Infectious Diseases* 10 (Supplement 4): S615-S619.

Arnett EB, Hein CD, Schirmacher MR, Huso MP, Szewczak JM (2013) Evaluating the effectiveness of an ultrasonic acoustic deterrent for reducing bat fatalities at wind turbines. *PLoS One* 8: e65794.

Arnett EB, Huso MMP, Schirmacher MR, Hayes JP (2011) Altering turbine speed reduces bat mortality at wind-energy facilities. *Frontiers in Ecology and the Environment* 9: 209-214.

Arnett EB, Schirmacher MR, Huso MMP, Hayes JP (2009) Patterns of bat fatality at the Casselman Wind Project in south-central Pennsylvania. An annual report submitted to the Bats and Wind Energy Cooperative and the Pennsylvania Game Commission. Bat Conservation International. Austin, Texas, USA.

<http://www.batsandwind.org/pdf/2008%20Casselman%20Fatality%20Report.pdf> Accessed 6 December 2014

Australian Transport Safety Board (2012). Australian aviation wildlife strike statistics: Bird and animal strikes 2002 to 2011. Report No. AAR-2012-031, 121 p. Available at [http://www.atsb.gov.au/media/3913013/ar-2012-031\\_.pdf](http://www.atsb.gov.au/media/3913013/ar-2012-031_.pdf) Accessed 1 March 2015.

Aves Environnement & Groupe Chiroptères de Provence (2009) Parc éolien du Mas de Leuze (St Martin de Crau, 13) : Evaluation de la mortalité des Chiroptères : 15 mars 30 septembre 2009. Unpublished intermediate report.

Bach L, Tillmann M (2012) Fachstellungnahme Fledermäuse zum potentiellen Windparkstandort Belum. – unpubl. report to e3 Projekt 46 GmbH & Co. KG

Bach P, Bach L, Sinning F (2014) Fledermausmonitoring im Windpark Walsrode - Gondelmonitoring und Schlagofersuche, Endbericht 2013 - unpubl. report to Munira GmbH & Co. KG.

Baerwald EF, Barclay RMR (2009) Geographic variation in activity and fatality of migratory bats at wind energy facilities. *Journal of Mammalogy* 90: 1341-1349.

Baerwald EF, Barclay RMR (2011) Patterns of activity and fatality of migratory bats at a wind energy facility in Alberta, Canada. *Journal of Wildlife Management* 75: 1003-1114.

Baerwald EF, D'Amours GH, Klug BJ, Barclay RMR (2008) Barotrauma is a significant cause of bat fatalities at wind turbines. *Current Biology* 18: R695–R696.

Bailey VB (1928) Animal life of the Carlsbad Cavern. *Monographs of the American Society of Mammalogists* 3: 1-195.

Bailey VB (1936) The mammals and life zones of Oregon. *North American Fauna Series* 55: 1-416.

Baker, E.C.S. (1917) Notes on the nidification of some Indian Falconidae. *Ibis* 59: 224-240.

Baker JK (1962) The manner and efficiency of raptor depredations on bats. *Condor* 64: 500-504.

Barbour RW, Davis WH (1969) *Bats of America*. University Press of Kentucky, Lexington, Kentucky, USA

Barbour RW, Davis WH, Hassell MD (1966) The need of vision in homing by *Myotis sodalis*. *Journal of Mammalogy* 47: 356-357.

Barclay RMR, Thomas DW, Fenton MB (1980) Comparison of methods used for controlling bats in buildings. *Journal of Wildlife Management* 44: 502-506.

Barros MAS, Gastal de Magalhães R, Rui AM (2015) Species composition and mortality of bats at the Osório Wind Farm, southern Brazil. *Studies on Neotropical Fauna and Environment* 50: 31-39.

Bastos R, Santos M, Cabral JA (2013) A new stochastic dynamic tool to improve the accuracy of mortality estimates for bats killed at wind farms. *Ecological Indicators* 34: 428– 440.

Bat Recovery Project (2007) Hungry bats get help from Brisbane City Council. *Brisbane Bat Chatter* 2: 1. Available at: <http://www.bats.org.au/news-and-events/news/newsletter.php>. Accessed 22 May 2015.

- Beer JR (1953) The screech owl as a predator on the big brown bat. *Journal of Mammalogy* 34: 384.
- Bennett VJ, Hale AM (2014) Red aviation lights on wind turbines do not increase bat-turbine collisions. *Animal Conservation* 17: 354-358.
- Beucher Y, Kelm V, Albespy F, Geyelin M, Nazon L, Pick D (2013) *Parc éolien de Castelnaud-Pégayrols (12): Suivi pluriannuel des impacts sur les chauves-souris*. Bilan des campagnes des 2ème, 3ème et 4ème années d'exploitation (2009-2011).
- Bergmans W, Rozendaal FG (1988) Notes on collections of fruitbats from Sulawesi and some off-lying islands (Mammalia, Megachiroptera). *Zoologische Verhandelingen* 248: 1-74.
- BHE (2011). *Post-construction bird and bat mortality study: Cedar Ridge Wind Farm, Fond Du Lac County, Wisconsin*. Interim report prepared for Wisconsin Power and Light, Madison, Wisconsin. Prepared by BHE Environmental, Inc. Cincinnati, Ohio. February 2010. Available at [http://psc.wi.gov/apps35/ERF\\_view/viewdoc.aspx?docid=146174](http://psc.wi.gov/apps35/ERF_view/viewdoc.aspx?docid=146174) Accessed 11 December 2014
- Bio3 (2010). *Monitorização da Comunidade de Quirópteros do Parque Eólico da Serra do Mú. Relatório III (Fase de exploração - Ano 2009)*. Relatório elaborado para EDP renováveis - enernova. Bio3, Almada.
- Bio3 (2011a). *Monitorização da Comunidade de Quirópteros do Sub-Parque Eólico de Facho-Colmeia (Parque Eólico da Terra Fria)*. Relatório III (Fase de exploração - Ano 1). Relatório elaborado para ENEOP2, exploração de parques eólicos. Bio3, Almada.
- Bio3 (2011b). *Monitorização da Comunidade de Quirópteros do Sub-Parque Eólico de Montalegre (Parque Eólico da Terra Fria)*. Relatório III (Fase de exploração - Ano 1). Relatório elaborado para ENEOP2, exploração de parques eólicos. Bio3, Almada.
- Black HL, Howard G, Stjernstedt R (1979) Observations on the feeding behavior of the bat hawk (*Macheiromphus alcinus*). *Biotropica* 11: 18-21.
- Blehert DS, Hicks AC, Behr M, Meteyer CU, Berlowski-Zier BM, Buckles EL, et al. (2009) Bat white-nose syndrome: an emerging fungal pathogen? *Science* 323: 227.
- Blehert DS, Maluping RP, Green E, Berlowski-Zier BM, Ballmann AE, Langenberg JA (2014) Acute pasteurellosis in wild big brown bats (*Eptesicus fuscus*). *Journal of Wildlife Diseases* 50: 136-139.
- Bond RM, Seaman GA. 1958. Notes on a colony of *Brachyphylla cavernarum*. *Journal of Mammalogy* 39: 150-151.
- Booth ES (1965) A bat die off in Mexico. *Journal of Mammalogy* 46: 333-334.

Bourne S, Hamilton-Smith E (2007) *Miniopterus schreibersii bassani* and climate change. *Australasian Bat Society Newsletter* 28: 67-69.

Bowen-Jones E, Abrutut D, Markham B, Bowe S (1997) Flying foxes on Choiseul (Solomon Islands)—the need for conservation action. *Oryx* 31: 209–217.

Braaksma S (1973) Some details about the occurrence of bats in summer and winter-resorts in The Netherlands and about the risks caused by wood preservation activities in buildings. *Periodicum Biologorum* 75: 125-128.

Braaksma S, van der Drift JWPT (1972) Bats pesticides conflicts. *TNO Nieuws* 27: 579-583.

Brack V Jr, Duffey JA, R. K. Dunlap RK, Johnson SA (2005) Flooding of hibernacula in Indiana: are some caves population sinks. *Bat Research News* 46:71-74

Brinkmann R, Schauer-Weissahn H, Bontadina F (2006) *Untersuchungen zu möglichen betriebsbedingten Auswirkungen von Windkraftanlagen auf Fledermäuse im Regierungsbezirk Freiburg*. Report to Regierungspräsidium Freiburg — Referat 56 Naturschutz und Landschaftspflege. Available at [www.rp-freiburg.de/servlet/PB/show/1158478/rpf-windkraft-fledermaeuse.pdf](http://www.rp-freiburg.de/servlet/PB/show/1158478/rpf-windkraft-fledermaeuse.pdf). English translation available at <http://www.oddzialywaniawiatrakow.pl/upload/file/367.pdf> Accessed 1 January 2015.

Brown DE (1994) *Vampiro: the vampire bat in fact and fantasy*. University of Utah Press, Salt Lake City, Utah, USA.

Brown WK, Hamilton BL (2006a) *Bird and bat interactions with wind turbines Castle River Wind Farm, Alberta 2001-2002*. Report for VisionQuest Windelectric, Inc., Calgary, Alberta, Canada. <http://www.batsandwind.org/pdf/Castle%20River%20Alberta%20Canada.pdf> Accessed 20 Nov 2014.

Brown WK, Hamilton BL (2006b) *Bird and bat monitoring at the McBride Lake Wind Farm, Alberta, 2003-2004*. Report for Vision Quest Windelectric, Inc., Calgary, Alberta, Canada. <http://www.batsandwind.org/pdf/McBride%20Alberta%20Canada.pdf>. Accessed 20 Nov 2014.

Brown WK, Hamilton BL (2006c) *Monitoring of bird and bat collisions with wind turbines at the Summerview Wind Power Project, Alberta, 2005-2006*. Report for Vision Quest Windelectric, Inc, Calgary, Alberta, Canada. <http://www.batsandwind.org/pdf/Brown2006.pdf>. Accessed 20 Nov 2014.

Brown WK, Hamilton BL (2002) *Draft report: bird and bat interactions with wind turbines Castle River Wind Farm, Alberta*. Report for VisionQuest Windelectric, Inc., Calgary, Alberta, Canada. Available at <http://www.batsandwind.org/pdf/Castle%20River%20Alberta%20Canada.pdf> Accessed 31 December 2014

- Buettner PG, Westcott DA, Maclean J, Brown L, McKeown A, Johnson A et al. (2013) Tick paralysis in spectacled flying-foxes (*Pteropus conspicillatus*) in North Queensland, Australia: impact of a ground-dwelling ectoparasite finding an arboreal host. *PLoS ONE* 8: e73078.
- Byre V J (1990) A group of young peregrine falcons prey on migrating bats. *Wilson Bulletin* 102: 728-730.
- Caire W, Ports MA (1981) An adaptive method of predation by the great horned owl on Mexican free-tailed bats. *Southwestern Naturalist*. 26: 69-70.
- Campbell B (1931) Bats on the Colorado Desert. *Journal of Mammalogy* 12: 430.
- Campbell CAR (1925) *Bats, mosquitos, and dollars*. Boston, Massachusetts, USA
- Capo G, Chaut J-J, Laurent A (2006) Quatre ans d'étude de mortalité des Chiroptères sur deux kilomètres routiers proche d'un site d'hibernation. . *Symbioses, Bulletin des Muséums d'Histoire Naturelle de la Région Centre, Nouvelle Série* 15: 45-46.
- Cardiff SG, Ratrimomanarivo FH, Rembert G, Goodman SM (2009) Hunting, disturbance and roost persistence of bats in caves at Ankarana, northern Madagascar. *African Journal of Ecology* 47: 640–649.
- Carmody S (2015) Michigan bats falling victim to white-nose syndrome. *Michigan Radio News*. Available at <http://michiganradio.org/post/michigan-bats-falling-victim-white-nose-syndrome> Accessed 25 May 2015.
- Carroll JB (1984). The conservation and wild status of the Rodrigues fruit bat, *Pteropus rodricensis*. *Myotis* 21-22: 148-154.
- Chambers MR, Esrom D (1991) The fruit bats of Vanuatu. *Bat News* 20: 4–5.
- Cheke AS, Dahl JF (1981) The status of bats on western Indian Ocean islands, with special reference to *Pteropus*. *Mammalia* 45: 205-238.
- Choquene G-L (2006) Mortalité de chauves-souris suite à des collisions avec des véhicules routiers en Bretagne. . *Symbioses, Bulletin des Muséums d'Histoire Naturelle de la Région Centre, Nouvelle Série* 15: 43-46.
- Clark DR Jr (1981) Bats and environmental contaminants: a review. *United States Fish and Wildlife Service Special Scientific Reports Wildlife* 235: 1-27.
- Clark DR Jr (2001) DDT and the decline of free-tailed bats (*Tadarida brasiliensis*) at Carlsbad Cavern, New Mexico. *Archives of Environmental Contamination and Toxicology* 40: 537–543.
- Clark DR Jr, Hothem RL (1991) Mammal mortality at Arizona, California, and Nevada gold mines using cyanide extraction. *California Fish and Game* 77: 61-69.

Clark DR Jr, Shore RF (2001) Chiroptera. In: Shore RF, Rattner BA (eds), *Ecotoxicology of wild mammals*, 159-214. John Wiley & Sons, Chichester, West Sussex, England.

Clark DR Jr, Kunz TH, Kaiser TE (1978a) Insecticides applied to a nursery colony of little brown bats (*Myotis lucifugus*): lethal concentrations in brain tissues. *Journal of Mammalogy* 59: 84-91.

Clark DR Jr, LaVal RK, Swineford DM (1978b) Dieldrin-induced mortality in an endangered species, the gray bat (*Myotis grisescens*). *Science* 199:1357-1359.

Clark DR Jr, LaVal RK, Krynitsky AJ (1980) Dieldrin and heptachlor residues in dead gray bats, Franklin County, Missouri—1976 versus 1977. *Pesticides Monitoring Journal* 13:137-140.

Clark DR Jr, Clawson RL, Stafford CJ (1983a) Gray bats killed by dieldrin at two additional Missouri caves: aquatic macroinvertebrates found dead. *Bulletin of Environmental Contamination and Toxicology* 30: 214-218.

Clark DR Jr, Bunck CM, Cromartie E, LaVal RK (1983b) Year and age effects on residues of dieldrin and heptachlor in dead gray bats, Franklin County, Missouri—1976, 1977, and 1978. *Environmental Toxicology and Chemistry* 2:387-393.

Clark DR Jr, Bagley FM, Johnson WW (1988) Northern Alabama colonies of the endangered gray bat *Myotis grisescens*: organochlorine contamination and mortality. *Biological Conservation* 43:213-225.

Clark DR Jr, Lollar A, Cowan DF (1996) Dead and dying Brazilian free-tailed bats (*Tadarida brasiliensis*) from Texas: rabies and pesticide exposure. *Southwestern Naturalist* 41: 275-278.

Clawson RL, Clark DR Jr (1989) Pesticide contamination of endangered gray bats and their food base in Boone County, Missouri, 1982. *Bulletin of Environmental Contamination and Toxicology* 42:431-437.

Cockrum EL (1969) Editorial: insecticides and guano bats. *Journal of the Arizona Academy of Sciences* 5: 198.

Cockrum EL (1970) Insecticides and guano bats. *Ecology* 51: 761-762.

Collins, D. 1798. *An account of the English colony in New South Wales: with remarks on the dispositions, customs, manners, &c. of the native inhabitants of that country. To which are added, some particulars of New Zealand, compiled, by permission from the mss. of Lieutenant-Governor King*. Cadell and David, London, UK.

Collins L (1999) The impact of drought on the flying-foxes of the NSW North Coast. *The Australasian Bat Society Newsletter* 12: 31-32.

Constantine DG (1948) Great bat colonies attract predators. *National Speleological Society Bulletin* 10: 100.

Constantine DG (1967) Activity patterns of the Mexican free-tailed bat. *University of New Mexico Publications in Biology*, no. 7

Constantine DG (1970) Bats in relation to the health, welfare, and economy of man. In: Wimsatt WA (ed) *Biology of Bats Volume II*, 319-449. Academic Press, New York, USA.

Constantine DG, Tierkel ES, Kleckner MD, Hawkins DM (1968) Rabies in New Mexico cavern bats. *Public Health Reports* 83: 303-316.

Cornut J, Vincent S (2010) *Suivi ornithologique et chiroptérologique du parc éolien de Castelnau-Pégayrols. Bilan de la première année de suivi*. LPO Drôme, Saint-Marcel-de-Valence, Drôme, France. Available at [http://www.sfepm.org/pdf/Rapport\\_suivieolien2010\\_RhoneAlpes.pdf](http://www.sfepm.org/pdf/Rapport_suivieolien2010_RhoneAlpes.pdf) Accessed 7 January 2015.

Corrao A, Catalano R, Zava B (1985) Destructive effects of chlorinated pesticides on a bats colony. *Mammalia* 49: 125-130.

Coudenhove H (1925) *My African neighbors: man, bird and beast in Nyasaland*. Little, Brown and Co., Boston, Massachusetts, USA.

Courtin F, Stone WB, Risatti G, Gilbert K, Van Kruiningen HJ (2010) Pathologic findings and liver elements in hibernating bats with white-nose syndrome. *Veterinary Pathology* 47: 214-219.

Coultas WF (1931) *Whitney South Seas Expedition Journals, Volume W*. Unpublished journal and letters of William F, Coultas, Volume II, November 1930 to December 1931. American Museum of Natural History, New York, New York, USA.

Craig P, Syron W (1992) Fruit bats in American Samoa - their status and future. In: Wilson DE, Graham GL (eds) *Pacific Flying Foxes - Proceedings of an International Conservation Conference*, U.S. Fish and Wildlife Service Biological Report 90:145-149.

Craig P, Trail P, Morrell TE (1994) The decline of fruit bats in American Samoa due to hurricanes and overhunting. *Biological Conservation* 69: 261-266.

Cryan PM, Gorresen PM, Hein CD, Schirmacher MR, Diehl RH, Huso MM et al. (2014) Behavior of bats at wind turbines. *Proceedings of the National Academy of Sciences USA* 111: 15126–15131.

Dalquest WW (1953) Mammals of the Mexican state of San Luis Potosi. *Louisiana State University Studies, Biological Science Series* 1: 1-233.

Daschback N (1990) After the hurricane. *Bats* 8: 14-15.



Davis A, Gordy P, Rudd R, Jarvis JA, Bowen RA (2012) Naturally acquired rabies virus infections in wild-caught bats. *Vector-Borne and Zoonotic Diseases* 12: 55-60.

Davis WH (1965) Bats dying in Missouri caves. *Bat Research News* 6: 36.

DeBlase AF, Humphrey SR, Drury KS (1965) Cave flooding and mortality in bats in Wind Cave, Kentucky. *Journal of Mammalogy* 46: 96.

Debrot, AO, De Freitas JA, Brouwer A, Van Marwijkkooy M (2001) The Curaçao barn owl: status and diet. *Caribbean Journal of Science* 37:185–193.

Degener O (1949) *Naturalist's South Pacific expedition: Fiji*. Paradise of the Pacific Publishers, Honolulu, Hawaii, USA.

De Lucas J (2007) *Miniopterus schreibersii* (Kuhl, 1817). Ficha Libro Rojo. In: Palomo L.J., Gisbert J, Blanco JC (Eds.). *Atlas y libro rojo de los Mamíferos terrestres de España*, 265-266. Dirección General para la Biodiversidad - SECEM - SECEMU, Madrid, Spain.

Dennis GC Gartrell BD (2015) Nontarget mortality of New Zealand lesser short-tailed bats (*Mystacina tuberculata*) caused by diphacinone. *Journal of Wildlife Diseases* 51: 177-186.

Derby C, Dahl A, Erickson W, Bay K, Hoban J (2007) *Post-construction monitoring report for avian and bat mortality at the NPPD Ainsworth Wind Farm*. Report prepared for Nebraska Public Power District. Western Ecosystems Technology, Inc., Cheyenne, Wyoming, USA.

<http://snr.unl.edu/renewableenergy/download/Avian%20&%20Bat%20Mortality%20at%20the%20NPPD%20Ainsworth%20Wind%20Farm.pdf> Accessed 6 December 2014

Dew B (1965) Dead bats at Wombeyan. *Australian Bat Research News* 4: 6.

Disser J, Nagel A (1989) Polychlorinated biphenyls in a maternity colony of the common pipistrelle (*Pipistrellus pipistrellus*). In: Hanak V, Horacek J, Gaisler J (eds) *European Bat Research 1987*, 637-644. Charles University Press, Praha, Czech Republic.

Dolbeer RR, Fielder LR, Rasheed H (1988) Management of fruit bat and rat populations in the Maldiv Islands, Indian Ocean. In: Crabb AC, Marsh RE (eds) *Proceedings of the Thirteenth Vertebrate Pest Conference*, 112–118. University of California, Davis.

Doty AC, Martin AP (2013) Assessment of bat and avian mortality at a pilot wind turbine at Coega, Port Elizabeth, Eastern Cape, South Africa. *New Zealand Journal of Zoology* 40: 75-80.

Dovich P (2015) Bat hunts and disease outbreaks. *Economic and Political Weekly* 50. Available at: <http://www.epw.in/web-exclusives/bat-hunts-and-disease-outbreaks.html>.

Drolia R (2015) Three including kids die due to heatstroke in Chhattisgarh, several bats too found dead. <http://timesofindia.indiatimes.com/city/raipur/Three-including-kids-die-due-to-heatstroke-in-Chhattisgarh-several-bats-too-found-dead/articleshow/47419332.cms> Accessed 21 June 2015

Dulac P (2008) *Evaluation de l'impact du parc éolien de Bouin (Vendée) sur l'avifaune et les chauves-souris; Bilan des 5 années de suivi*. Ligue pour la Protection des Oiseaux délégation Vendée / ADEME Pays de la Loire / Conseil Régional des Pays de la Loire, La Roche-sur-Yon – Nantes, France. Available at <http://docs.wind-watch.org/bouin-vendee-avifaune-chauvessouris.pdf> Accessed 3 January 2015.

Dulac P (2010) Bilan de 3,5 années de suivi de la mortalité des chiroptères sous les éoliennes de Bouin (Vendée). *Symbioses, Bulletin des Muséums d'Histoire Naturelle de la Région Centre, Nouvelle Série* 25: 32-36.

Dumith Arteaga G, Lopez Adaros H, Rosales Gill H (1967). Venezuela. *First Seminario Internacional Rabia Americas*, Ramos Mejia, Argentina 1967: 416-429.

Dwyer, P.D. 1964. Fox predation on cave bats. *Australian Journal of Science* 26: 397.

Eads RB, Wiseman JS, Grimes JE, Menzies GC (1955) Wildlife rabies in Texas--a preliminary report. *Public Health Reports* 70: 995-1000.

Enk T, Bay K, Sonnenberg M, Boehrs JR (2012) *Year 2 Post-Construction Avian and Bat Monitoring Report, Biglow Canyon Wind Farm Phase II, Sherman County, Oregon. September 13, 2010 – September 15, 2011*. Technical report prepared for Portland General Electric, Portland, Oregon. Prepared by Western EcoSystems Technology, Inc. (WEST), Cheyenne, Wyoming, and Walla Walla, Washington. Available at:

Enk T, Bay K, Sonneberg M, Flaig J, Boehrs JR, Palochak A (2011) *Year 1 Post-Construction Avian and Bat Monitoring Report Biglow Canyon Wind Farm Phase II, Sherman County, Oregon September 10, 2009 – September 12, 2010*. Technical report prepared for Portland General Electric, Portland, Oregon. Prepared by Western EcoSystems Technology, Inc., Cheyenne, Wyoming and Walla Walla, Washington. Available at: [http://www.oregon.gov/energy/Siting/docs/BCW/BCW\\_2010MonitoringReport.pdf](http://www.oregon.gov/energy/Siting/docs/BCW/BCW_2010MonitoringReport.pdf) Accessed 18 December 2014.

Erickson, WP, Jeffrey J, Poulton VK (2008) *Avian and bat monitoring: year 1 report. Puget Sound Energy Wild Horse Wind Project, Kittitas County, Washington*. Prepared for Puget Sound Energy, Ellensburg, Washington, by Western EcoSystems Technology, Inc., Cheyenne, Wyoming, USA. January 2008. Available at <http://www.docstoc.com/docs/89741475/Puget-Sound-Energy-Wild-Horse-Wind-Facility-Post-Construction> Accessed 12 December 2014

Erickson WP, Gritski PB, Kronner K (2003) *Nine Canyon Wind Power Project avian and bat monitoring annual report*. Technical report submitted to Energy Northwest and the Nine Canyon

Technical Advisory Committee. Western Ecosystems Technology, Inc., Cheyenne, Wyoming, USA. [http://www.batsandwind.org/pdf/Erickson\\_etal\\_2003.pdf](http://www.batsandwind.org/pdf/Erickson_etal_2003.pdf). Accessed 6 December 2014

Erickson WP, Jeffrey J, Kronner K, Bay K (2004) *Stateline Wind Project Wildlife Monitoring Annual Report, Results for the Period July 2001 – December 2002*. Technical report submitted to FPL Energy, the Oregon Office of Energy, and the Stateline Technical Advisory Committee. Western Ecosystems Technology, Inc., Cheyenne, Wyoming, USA. [http://www.batsandwind.org/pdf/Erickson\\_etal\\_2004.pdf](http://www.batsandwind.org/pdf/Erickson_etal_2004.pdf) Accessed 6 December 2014

Erickson WP, Johnson GD, Strickland MD, Kronner K (2000). *Final report: avian and bat mortality associated with the Vansycle wind project, Umatilla County, Oregon 1999 study year*. Report for Umatilla County Dept. Resource Services and Development. Western Ecosystems Technology, Inc., Cheyenne, Wyoming, USA. <http://www.batsandwind.org/pdf/Ericksonetal2000.pdf> Accessed 6 December 2014

Esselstyn JA, Amar A, Janeke D (2006) Impact of post-typhoon hunting on Mariana fruit bats (*Pteropus mariannus*). *Pacific Science* 60: 531-539.

Falanruw M (1988) On the status, reproductive biology and management of fruit bats of Yap. *Micronesica* 21: 39-51.

Fenton MB, Cumming DHM, Oxley DJ (1977) Prey of bat hawks and availability of bats. *Condor* 79: 495-497.

Fenton MB, Rautenbach IL, Smith SE, Swanepoel CM, Grosell J, van Jaarsveld J (1994) Raptors and bats: threats and opportunities. *Animal Behaviour* 48: 9-18.

Fiedler JK (2004) *Assessment of Bat Mortality and Activity at Buffalo Mountain Windfarm, Eastern Tennessee*. Thesis, University of Tennessee, Knoxville, Tennessee, USA.

Fiedler JK, Henry TH, Nicholson CP, Tankersley RD (2007). *Results of bat and bird mortality monitoring at the expanded Buffalo Mountain Windfarm, 2005*. Tennessee Valley Authority, Knoxville, Tennessee, USA. [http://www.batsandwind.org/pdf/Fiedler\\_etal\\_2007.pdf](http://www.batsandwind.org/pdf/Fiedler_etal_2007.pdf). Accessed 20 Nov 2014.

Flannery TF (1989) Flying foxes in Melanesia: populations at risk; small populations on islands have unique conservation problems. *Bats* 7: 5-7.

Flannery TF (1994) The rediscovery of Bulmer's fruit bat. *Bats* 12: 3-5.

Flannery TF, Seri L (1990) The mammals of southern West Sepik Province, Papua New Guinea: their distribution, abundance, human use and zoogeography. *Records of the Australian Museum* 42: 173–208.

Flickinger EL, Bunck CM (1987) Number of oil-killed birds and fate of bird carcasses at crude oil pits in Texas. *Southwestern Naturalist* 32: 377-381.

Foster GW, Humphrey SR, Humphrey PP (1978) Survival rate of young southeastern brown bats, *Myotis austroriparius*, in Florida. *Journal of Mammalogy* 59: 299-304.

Fox S, Luly J, Mitchell C, Maclean J, Westcott DA (2008) Demographic indications of decline in the spectacled flying fox (*Pteropus conspicillatus*) on the Atherton Tablelands of northern Queensland. *Wildlife Research* 35: 417-424.

Francis CM, Guillén A, Robinson MF (1999) Order Chiroptera: bats. In: Duckworth JW, Salter RE, K. Khounboline K (eds) *Wildlife in Lao PDR*, 225-235. IUCN, Vientiane, Lao PDR.

Frick WF, Pollock JF, Hicks AC, Langwig KE, Reynolds DS, Turner GG et al. (2010). An emerging disease causes regional population collapse of a common North American bat species. *Science* 329: 679-682.

Fujita M (1988) Flying foxes and economics. *Bats* 6. Available at <http://www.batcon.org/index.php/media-and-info/bats-archives.html?task=viewArticle&magArticleID=318>

Fujita MS, Tuttle MD (1991) Flying foxes (Chiroptera: Pteropodidae): threatened animals of key ecological and economic importance. *Conservation Biology* 5: 455-463.

Gaisler J, Øehák Z, Bartonièka T (2009) Bat casualties by road traffic (Brno-Vienna). *Acta Theriologica* 54: 147-155.

Gannon MR, Willig MR (1994) The effects of Hurricane Hugo on bats of the Luquillo Experimental Forest of Puerto Rico. *Biotropica* 26: 320-331.

Georgiakakis P, Kret E, Cárcamo B, Doutau B, Kafkaletou-Diez A, Vasilakis D et al. (2012) Bat fatalities at wind farms in north-eastern Greece. *Acta Chiropterologica* 14: 459-468.

Gergis J, Karoly DJ, Allan RJ (2009) A climate reconstruction of Sydney Cove, New South Wales, using weather journal and documentary data, 1788-1791. *Australian Meteorological and Oceanographic Journal* 58: 83-98.

Glinski RL, Ohmart RD (1983) Breeding ecology of the Mississippi Kite in Arizona. *The Condor* 85: 200-207.

Godfrey M (2014) Heatwave hell as 5000 dead bats drop from trees in Casino, northern NSW. Daily Telegraph, Sydney. 19 November. Available at: <http://www.dailytelegraph.com.au/news/nsw/heatwave-hell-as-5000-dead-bats-drop-from-trees-in-casino-northern-nsw/story-fni0cx12-1227126679445>

González-Prieto S, Villarino A, Freán MM (1993) Mortalidad de vertebrados por atropello en una carretera nacional del no de España. *Ecología* 7: 375-389.

Good R, Erickson W, Merrill A, Simon S, Murray K, Bay K, Fritchman C (2011) *Bat monitoring studies at the Fowler Ridge Wind Energy Facility Benton County, Indiana*. A report prepared for Fowler Ridge Wind Farm. Western EcoSystems Technology, Inc., 2003 Central Avenue, Cheyenne, Wyoming 82001.  
[http://www.batsandwind.org/pdf/Fowler\\_Final\\_SRRP\\_Report\\_January\\_31\\_2011.pdf](http://www.batsandwind.org/pdf/Fowler_Final_SRRP_Report_January_31_2011.pdf) Accessed 6 December 2014

Good RE, Merrill A, Simon S, Murray KL, Bay K (2012) *Bat Monitoring Studies at the Fowler Ridge Wind Farm, Benton County, Indiana. Final Report: April 1 – October 31, 2011*. Prepared for Fowler Ridge Wind Farm, Fowler, Indiana. Prepared by Western EcoSystems Technology, Inc. Bloomington, Indiana.  
[http://www.batsandwind.org/pdf/Good%20et%20al.%202012\\_Fowler%20Report.pdf](http://www.batsandwind.org/pdf/Good%20et%20al.%202012_Fowler%20Report.pdf) Accessed 7 December 2014

Good RE, Sonnenberg M, Simon S (2013) *Bat Evaluation Monitoring Studies at the Fowler Ridge Wind Farm, Benton County, Indiana. Final Report: August 1 – October 15, 2012*. Prepared for Fowler Ridge Wind Farm, Fowler, Indiana. Prepared by Western EcoSystems Technology, Inc. Bloomington, Indiana.  
[http://www.batsandwind.org/pdf/Good%20et%20al.%202013\\_Fowler%20Final%20%20Report%2031%20January%202013.pdf](http://www.batsandwind.org/pdf/Good%20et%20al.%202013_Fowler%20Final%20%20Report%2031%20January%202013.pdf) Accessed 7 December 2014

Goodman SM (2006) Hunting of Microchiroptera in south-western Madagascar *Oryx* 40: 225-228.

Goodman SM, Ratrimomanarivo FH, Ranivo J, Cardiff SG (2008) The hunting of Microchiropteran bats in different portions of Madagascar. *African Bat Conservation News* 16 (April): 4-7.

Goodpaster W, Hoffmeister DF (1950) Bats as prey for mink in Kentucky cave. *Journal of Mammalogy* 31: 457.

Gore JA, Hovis JA (1994) *Southeastern Myotis Maternity Cave Survey*. Florida Game and Fresh Water Fish Commission Nongame Wildlife Program Final Performance Report, Tallahassee, Florida USA

Gosnell M (1977) Carlsbad's famous bats are dying off. *National Wildlife* 15: 29–33.

Göttsche M, Göbel H (2007). Teichfledermaus (*Myotis dasycneme*) als Kollisionsopfer an einer Windenergieanlage. *Nyctalus* (N.F.) 12 (2/3): 277-281.

Greenhall AM (1963) Use of mist nets and strychnine for vampire control in Trinidad. *Journal of Mammalogy* 44: 396-399.

Greenhall AM (1970) Vampire bat control: a review and proposed research programme for Latin America. *Proceedings of the Vertebrate Pest Conference* 4: 41-54.

Greenhall AM, Stell G (1960) Bionomics and chemical control of free-tailed house bats (*Molossus*) in Trinidad. *U.S. Fish and Wildlife Service Special Scientific Report-Wildlife* 53: 1-20.

Gremillet X, Boireau J (2004) Intoxication mortelle par le plomb et par le fongicide P.C.P. des juvéniles dans un gîte de parturition de Grands rhinolophes *Rhinolophus ferrumequinum* dans le Finistère : difficultés du diagnostic et réalisation d'un gîte alternatif. *Symbioses, Bulletin des Muséums d'Histoire Naturelle de la Région Centre, Nouvelle Série* 10: 51-56.

Griffin D (1953) Deluge underground. *Bulletin of the National Speleological Society* 15: 34-37.

Grodsky SM, Jennelle CS, Drake D, Virzi T (2012) Bat mortality at a wind-energy facility in southeastern Wisconsin. *Wildlife Society Bulletin* 36: 773–783.

Gruver JC (2002) *Assessment of bat community structure and roosting habitat preferences for the hoary bat (Lasiurus cinereus) near Foote Creek Rim, Wyoming*. M.S. Thesis, University of Wyoming, Laramie.

Gruver JC, Sonnenberg M, Bay K, Erickson W (2009) *Post-construction bat and bird fatality study: Blue Sky Green Field Wind Resource Area, Fond du Lac County, Wisconsin*. Report prepared for WE Energies. Western Ecosystems Technology, Inc., Cheyenne, Wyoming, USA. <http://www.batsandwind.org/pdf/Blue%20Sky,%20WI%20report.pdf> Accessed 7 December 2014

Hadjisterkotis E (2006) The destruction and conservation of the Egyptian fruit bat *Rousettus aegyptiacus* in Cyprus: A historic review. *Journal of Wildlife Research* 52: 282-287.

Hahn WL (1907) The mammalian remains of the Donaldson Cave. *Proceedings of the Indiana Academy of Science* 15:142-144

Hall, JS (1962) A life history and taxonomic study of the Indiana bat, *Myotis sodalis*. *Reading Public Museum and Art Gallery, Scientific Publications* 12:1-68.

Hall L, Richards G (2000) *Flying Foxes: Fruit and Blossom Bats of Australia*, Krieger Publishing Company, Malabar, Florida, USA

Hall LS, Richards GC (1974) Notes on *Tadarida australis* (Chiroptera: Molossidae). *Australian Mammalogy* 1: 46-47.

Halstead LB (1977) Fruit bats: an example of wildlife management. *The Nigerian Field* 52:50–57.

Hamilton-Smith E (1967) Deaths of *Miniopterus schreibersi*. *Australian Bat Research News* 7: 3.

- Hammer M, Arlettaz R (1998) A case of snake predation upon bats in northern Morocco: some implications for designing bat grilles. *Journal of Zoology* (London) 245: 211-212.
- Hardy JD (1957) Bat predation by the Cuban boa, *Epicrates angulifer*. *Copeia* 1957: 151-152.
- Hariono B, Ng J, Sutton RH (1993) Lead concentrations in tissues of fruit bats (*Pteropus* sp.) in urban and non-urban locations. *Wildlife Research* 20: 315-320.
- Heinrich G (1943) *Der Vogel Schnarch. Zwei Jahre Rallenfang und Urwaldforschung in Celebes*. Zweite Auflage. Berlin, Germany.
- Hermanson JW, Wilkins KT (1986) Pre-weaning mortality in a Florida maternity roost of *Myotis austroriparius* and *Tadarida brasiliensis*. *Journal of Mammalogy* 67: 751-754.
- Herreid CF II (1967) Mortality statistics of young bats. *Ecology* 48: 310-312.
- Hitchcock HB (1963) An unintended bat trap. *Journal of Mammalogy* 44: 577-578.
- Hitchcock HB (1965) Twenty-three years of bat banding in Ontario and Quebec. *Canadian Field-Naturalist* 79: 4-14.
- Hoetker GM, Gobalet KW (1999) Predation on Mexican free-tailed bats by burrowing owls in California. *Journal of Raptor Research* 33: 333-335.
- Hoofer SR, Van Den Bussche RA, Horacek, I (2006) Generic status of the American pipistrelles (Vespertilionidae) with description of a new genus. *Journal of Mammalogy* 87: 981-992.
- Hovey HC 1882. *Celebrated American Caverns*. Robert Clarke and Co. Cincinnati, Ohio, USA
- Howe RW, Evans W, Wolf AT (2002) *Effects of wind turbines on birds and bats in northeastern Wisconsin*. Wisconsin Public Service Corporation, Green Bay, Wisconsin, USA. Unpublished report. [http://www.batsandwind.org/pdf/Howe\\_2002.pdf](http://www.batsandwind.org/pdf/Howe_2002.pdf) Accessed 6 December 2014
- Hull CL, Cawthen L (2013) Bat fatalities at two wind farms in Tasmania, Australia: bat characteristics, and spatial and temporal patterns. *New Zealand Journal of Zoology* 40: 5-15.
- Humphrey S (1964) Richmond, Indiana. *Bat Research News* 5: 34.
- Humphrey SR (1978) Status, winter habitat, and management of the endangered Indiana bat, *Myotis sodalis*. *Florida Scientist* 41: 65-76.
- Humphrey SR, Cope JB (1976) Population ecology of the little brown bat, *Myotis lucifugus*, in Indiana and north-central Kentucky. *American Society of Mammalogists Special Publication* 4: 1-81.

Huso MP (2011) An estimator of wildlife fatality from observed carcasses. *Envirometrics* 22: 318-329.

Huso MP, Dalthorp D, Dail D, Madsen L (2015) Estimating wind-turbine caused bird and bat fatality when zero carcasses are observed. *Ecological Applications* <http://dx.doi.org/10.1890/14-0764.1>

Husson AM (1962) The bats of Suriname. *Zoologische Verhandelingen* 58: 1-282.

Ibañez C, Ramo C, Busto B (1992) Notes on food habits of the black and white owl. *The Condor* 94: 529-531.

Ibañez C, Garcia-Mudarra JL, Ruedi M, Stadelmann B, Juste J (2006) The Iberian contribution to cryptic diversity in European bats. *Acta Chiropterologica* 8: 277-297.

Instituto da Conservação da Natureza e da Biodiversidade (2010) *Avaliação do efeito dos parques eólicos sobre os morcegos em Portugal continental (análise dos dados disponíveis em Outubro de 2009)*. Instituto da Conservação da Natureza e da Biodiversidade. Relatório não publicado. Available at <http://www.icnf.pt/portal/naturaclas/patrinatur/resource/docs/Mam/morc/parq-eol-morc-pt> Accessed 2 January 2015.

Jacques Whitford Stantec Ltd (2009) *Ripley Wind Power Project postconstruction monitoring report. Project No. 1037529.01*. Report to Suncor Energy Products Inc., Calgary, Alberta, and Acciona Energy Products Inc., Calgary, Alberta. Prepared for the Ripley Wind Power Project Post-Construction Monitoring Program. Prepared by Jacques Whitford, Markham, Ontario. April 30, 2009. Available at: <https://www.wind-watch.org/documents/ripley-wind-power-project-post-construction-monitoring-report/> Accessed 18 December 2014

Jain AA (2005) *Bird and Bat Behavior and Mortality at a Northern Iowa Wind Farm*. Thesis. Iowa State University, Ames, Iowa, USA.

Jain AA, Koford RR, Hancock AW, Zenner GG (2011) Bat mortality and activity at a northern Iowa wind resource area. *The American Midland Naturalist* 165: 185-200.

Jain A, Kerlinger P, Curry R, Slobodnik L (2007). *Annual report for the Maple Ridge wind power project post-construction bird and bat fatality study – 2006*. Annual report prepared for PPM Energy and Horizon Energy, Curry and Kerlinger LLC, Cape May Point, New Jersey, USA. Available at [http://www.batsandwind.org/pdf/Jain\\_2006.pdf](http://www.batsandwind.org/pdf/Jain_2006.pdf) Accessed 21 November 2014.

Jain A, Kerlinger P, Curry R, Slobodnik L (2009a) *Annual report for the Maple Ridge wind power project post-construction bird and bat fatality study – 2007*. Annual report prepared for PPM Energy and Horizon Energy, Curry and Kerlinger LLC, Cape May Point, New Jersey, USA. Available at [http://www.batsandwind.org/pdf/Jain\\_2009a.pdf](http://www.batsandwind.org/pdf/Jain_2009a.pdf) Accessed 7 December 2014



Jain A, Kerlinger P, Curry R, Slobodnik L (2009b) *Annual report for the Maple Ridge wind power project post-construction bird and bat fatality study – 2008*. Annual report prepared for PPM Energy and Horizon Energy, Curry and Kerlinger LLC, Cape May Point, New Jersey, USA. Available at [http://www.batsandwind.org/pdf/Jain\\_2009b.pdf](http://www.batsandwind.org/pdf/Jain_2009b.pdf) Accessed 7 December 2014.

Jameson JW, Willis CKR (2012) Bat mortality at a wind power facility in central Canada. *Northwestern Naturalist* 93: 194-202.

Jeffrey JD, Bay K, Erickson WP, Sonneberg M, Baker J, Kesterke M, Boehrs J, Palochak A (2009) *Portland General Electric Biglow Canyon Wind Farm Phase I post-construction avian and bat monitoring first annual report, Sherman County, Oregon. January 2008 - December 2008*. Technical report prepared for Portland General Electric Company, Portland, Oregon. Prepared by Western EcoSystems Technology, Inc, Cheyenne, Wyoming, and Walla Walla, Washington, USA. April 29, 2009. Available at: [http://www.oregon.gov/energy/Siting/docs/BCW/BCW\\_2008MonitoringReport.pdf](http://www.oregon.gov/energy/Siting/docs/BCW/BCW_2008MonitoringReport.pdf) Accessed 18 December 2014.

Johnson GD, Erickson WP, Strickland MD, Shepherd MF, Shepherd DA, Sarappo SA (2003a) Mortality of bats at a large-scale wind power development at Buffalo Ridge, Minnesota. *The American Midland Naturalist* 150: 332-342.

Johnson GD, Erickson WP, White J (2003b) *Avian and bat mortality at the Klondike, Oregon Phase I Wind Plant, Sherman County, Oregon*. Technical Report prepared for Northwestern Wind Power. Western Ecosystems Technology, Inc., Cheyenne, Wyoming, USA. [http://www.batsandwind.org/pdf/Johnson\\_etal\\_2003.pdf](http://www.batsandwind.org/pdf/Johnson_etal_2003.pdf) Accessed 24 November 2014

Johnson, GD, Perlik, MK, Erickson, WE, Strickland, MD (2004) Bat activity, composition and collision mortality at a large wind plant in Minnesota. *Wildlife Society Bulletin* 32: 1278-1288.

Jones JK Jr, Fleharty ED, Dunnigan PB (1967) Distributional notes on mammals of Kansas. *Miscellaneous Publications Museum of Natural History University of Kansas* 46: 1-33.

Jourde P (2003) Disparition des minioptères de Charente-Maritime. *Plecotus* 13: 8.

Kalpakis S, Papadatou A, von Helversen O (2005) Balcony of an urban building: an unintended trap for free-tailed bats (*Tadarida teniotis*) in the city of Thessaloniki. *Nyctalus* 10: 79-84.

Kerlinger P, Curry R, Culp L, Jain A, Wilkerson C, Fischer B, Hasch A (2006) *Post-construction avian and bat fatality monitoring study for the High Winds Wind Power Project, Solano County, California: two year report*. Curry and Kerlinger, LLC, Cape May Point, New Jersey, USA. [http://www.batsandwind.org/pdf/Kerlinger\\_etal\\_2006.pdf](http://www.batsandwind.org/pdf/Kerlinger_etal_2006.pdf) Accessed 24 November 2014.

Kerlinger P, Curry R, Culp L, Hasch A, Guarnaccia J (2007) *Migratory bird and bat study at the Crescent Ridge Wind Power Project, Bureau County, Illinois: September 2005 – August 2006*. Final Draft prepared for Orrick, Herrington, & Sutcliffe, LLP. Curry and Kerlinger, LLC, McLean, Virginia, USA.

Kerns J, Kerlinger P (2004) *A study of bird and bat collision fatalities at the Mountaineer Wind Energy Center, Tucker County, West Virginia. Annual report for 2003*. Curry and Kerlinger, LLC, McLean, Virginia, USA.

[http://www.batsandwind.org/pdf/Kerns%20and%20Kerlinger\\_2006.pdf](http://www.batsandwind.org/pdf/Kerns%20and%20Kerlinger_2006.pdf). Accessed 21 November 2014.

Kerns J, Erickson WP, Arnett EB (2005) Bat and bird fatality at wind energy facilities in Pennsylvania and West Virginia. Pages 24–95 In: Arnett EB (ed) *Relationships Between Bats and Wind Turbines in Pennsylvania and West Virginia: an Assessment of Bat Fatality Search Protocols, Patterns of Fatality, and Behavioral Interactions with Wind Turbines*, 24-95. A final report submitted to the Bats and Wind Energy Cooperative. Bat Conservation International, Austin, Texas, USA. <http://www.batsandwind.org/pdf/postconpatbatfatal.pdf> Accessed 21 November 2014.

King AA, Meredith CD, Thomson GR (1994) The biology of southern African lyssavirus variants. *Current Topics in Microbiology and Immunology* 187: 267-295.

Kirkconnell AD, Wechsler, Bush C (1999) Notes on the Stygian owl (*Asio stygius siguapa*) in Cuba. *El Pitirre* 12: 1–3.

Koestner EJ (1942) A method of collecting bats. *Journal of the Tennessee Academy of Sciences* 17: 301.

Koford R, Jain A, Zenner G, Hancock A (2004) *Avian mortality associated with the Top of Iowa Wind Farm: Progress Report, Calendar Year 2003*. Iowa Cooperative Fish and Wildlife Research Unit, Iowa State University, Ames, Iowa. 9pp. Available at [http://www.batsandwind.org/pdf/Koford\\_etal\\_2004.pdf](http://www.batsandwind.org/pdf/Koford_etal_2004.pdf) Accessed 7 December 2014.

Korner-Nievergelt F, Brinkmann R, Niermann I, Behr O (2013) Estimating bat and bird mortality occurring at wind energy turbines from covariates and carcass searches using mixture models. *PLoS ONE* 8: e67997.

Korstian JM, Hale AM, Bennett VJ, Williams DA (2013) Advances in sex determination in bats and its utility in wind-wildlife studies. *Molecular Ecology Resources* 13: 776-780.

Krenz JD, McMillan BR (2000) *Final Report: Wind-turbine related bat mortality in southwestern Minnesota*. Minnesota Department of Natural Resources, St. Paul. Available at: [http://files.dnr.state.mn.us/eco/nongame/projects/consgrant\\_reports/2000/2000\\_krenz\\_mcmillan.pdf](http://files.dnr.state.mn.us/eco/nongame/projects/consgrant_reports/2000/2000_krenz_mcmillan.pdf) Accessed 18 December 2014

Kunz TH (1974) Reproduction, growth, and mortality of the vespertilionid bat, *Eptesicus fuscus*, in Kansas. *Journal of Mammalogy* 55: 1-13.

Kunz TH, Anthony ELP, Ramage WT (1977) Mortality of little brown bats following multiple pesticide applications. *Journal of Wildlife Management* 41: 476-483.

- Kuramoto T, Uchida TA, Nakamura H (1969). Weasel and rat snake as predators on bats. *Bulletin of the Akiyoshi-dai Museum of Natural History* 6: 27-33.
- Lang H, Chapin JP (1917a) Notes on the distribution and ecology of central African Chiroptera. *Bulletin of the American Museum of Natural History* 37: 479-496.
- Lang H, Chapin JP (1917b) Field notes on African Chiroptera. *Bulletin of the American Museum of Natural History* 37: 497-563.
- Langwig KE, Frick WF, Bried JT, Hicks AC, Kunz TH, Kilpatrick AM (2012) Sociality, density-dependence and microclimates determine the persistence of populations suffering from a novel fungal disease, white-nose syndrome. *Ecology Letters* 15: 1050-1057.
- Ledec GC, Rapp KW, Aiello RG (2011) *Greening the wind: environmental and social considerations for wind power development in Latin America and beyond*. Energy Unit, Sustainable Development Department, Latin America and Caribbean Region, The World Bank. Available at [http://www.batsandwind.org/pdf/WIND-FULL%20REPORT-FINAL\\_7x10\\_WEB.pdf](http://www.batsandwind.org/pdf/WIND-FULL%20REPORT-FINAL_7x10_WEB.pdf) Accessed 4 January 2015
- Lee Y-F, Kuo Y-M (2001) Predation on Mexican free-tailed bats by peregrine falcons and red-tailed hawks. *Journal of Raptor Research* 35: 115-123.
- Leeuwangh P, Voüte AM (1985) Bats and woodpreservatives: pesticide residues in the Dutch pond bat (*Myotis dasycneme*) and its implications. *Mammalia* 49: 517-524.
- Leroy EM, Epelboin A, Mondonge V, Pourrut X, Gonzalez J-P, Muyembe-Tamfum JJ, Formenty P (2009) Human Ebola outbreak resulting from direct exposure to fruit bats in Luebo, Democratic Republic of Congo, 2007. *Vector-Borne and Zoonotic Diseases* 9: 723-728.
- Lesiński G (2007) Bat road casualties and factors determining their number. *Mammalia* 71: 138–142.
- Lesiński G, Sikora A, Olszewski A (2011) Bat casualties on a road crossing a mosaic landscape. *European Journal of Wildlife Research* 57:217–223.
- Loeb EM (1926) History and traditions of Niue. *Bulletin of the Bishop Museum* 32: 1- 226.
- Lyon MW Jr (1925) Bats caught by burdocks. *Journal of Mammalogy* 6: 280.
- MacGregor JR, Westerman AG (1982) Observations on an active maternity site for the gray bat in Jessamine County, Kentucky. *Transactions of the Kentucky Academy of Science* 43: 136-137.
- Makin D, Mendelsshon H (1987) The fruit bat issue in Israel. *Bat News* 11: 4-5.

Markus N, Hall L (2004) Foraging behaviour of the black flying-fox (*Pteropus alecto*). *Wildlife Research* 31: 345-355.

Martin L (2011) Is the fruit you eat flying-fox friendly? The effects of orchard electrocution grids on Australian flying-foxes (*Pteropus* spp. Megachiroptera). In: Law B, Eby P, Lunney D, Lumsden L (eds) *The Biology and Conservation of AustralAsian Bats*, 380-390. Royal Zoological Society of New South Wales.

McAlpine DF, Vanderwolf KJ, Forbes GJ, Malloch D (2011) Consumption of bats (*Myotis* spp.) by raccoons (*Procyon lotor*) during an outbreak of white-nose syndrome in New Brunswick, Canada: implications for estimates of bat mortality. *The Canadian Field-Naturalist* 125: 257-260.

McClelland KL, Fleming PJS, Malcolm PJ (2011) Grey-headed fling-foxes in orchards: a collaborative project on damage estimates, contributing factors, and mitigation strategies – triumphs and tribulations of flying-fox conservation and management in NSW. In: Law B, Eby P, Lunney D, Lumsden L (eds) *The Biology and Conservation of AustralAsian Bats*, 391-398. Royal Zoological Society of New South Wales.

McConkey KR, Drake DR, Franklin J, Tonga F (2004) Effects of Cyclone Waka on flying foxes (*Pteropus tonganus*) in the Vava'u Islands of Tonga. *Journal of Tropical Ecology* 20: 555-561.

McFarlane DA, Garret KL (1989) The prey of common barn owls (*Tyto alba*) in dry limestone scrub forest of southern Jamaica. *Caribbean Journal of Science* 25: 21-23.

McIlwee AP, Martin L (2002) On the intrinsic capacity for increase of Australian flying foxes (*Pteropus* spp), Megachiroptera). *Australian Zoologist* 32:76-100.

Medinas D, Marques JT, Mira A (2013) Assessing road effects on bats: the role of landscape, road features, and bat activity on road-kills. *Ecological Research* 28: 227–237.

Medway L (1958) 300,000 bats. *Sarawak Museum Journal* 8:667-679.

Miller A (2008) *Patterns of Avian and Bat Mortality at a Utility-Scaled Wind Farm on the Southern High Plains*. M.S. thesis, Texas Tech University, Lubbock, TX, USA.

Mitchell-Jones AJ, Cooke AS, Boyd IL, Stebbings RE (1989) Bats and remedial timber treatment chemicals – a review. *Mammal Review* 19: 93-110

Mohr CE (1972a) The status of threatened species of cave-dwelling bats. *Bulletin of the National Speleological Society* 34: 33-47.

Mohr CE (1972b) Delaware issues a bat alert. *Delaware Conservationist* 16: 22-23.

Monsalve-Dolz A (2014) Eventos de mortalidad accidental de Murciélago rabudo *Tadarida teniotis* en edificios altos de la ciudad de Valencia (España). *Barbastella* 7: 42-45.

Mühldorfer K, Speck S, Kurth A, Lesnik R, Freuling C, Müller T, Kramer-Schadt S, Wibbelt G. (2011) Diseases and Causes of Death in European Bats: Dynamics in Disease Susceptibility and Infection Rates. *PLoS ONE* 6(12): e29773.

Mumford RE (1969) Long-tailed weasel preys on big brown bats. *Journal of Mammalogy* 50: 360.

Murphy C (2014) As U.S. freezes and UK lies under flood water, intense heat wave in Australia cooks 100,000 bats. *Daily Mail online* 8 January. <http://www.dailymail.co.uk/news/article-2536073/As-U-S-freezes-UK-lies-flood-water-intense-heat-wave-Australia-literally-cooks-100-000-bats.html#ixzz2rWuIAsiY> . Accessed 26 January 2014.

Murphy M (1987) Vandals destroy hibernating Indiana bats. *Bats* 5: 2.

Murphy M (1993) Restoring Coach Cave. *Bats* 11. Available at <http://www.batcon.org/index.php/media-and-info/bats-archives.html?task=viewArticle&magArticleID=608>

Myers RF (1960) *Lasiurus* from Missouri caves. *Journal of Mammalogy* 41: 114-117.

Negredo A, Palacios G, Vázquez-Morón S, González F, Dopazo H, Molero F (2011) Discovery of an Ebolavirus-Like filovirus in Europe. *PloS Pathogens* 7(10):e1002304. doi:10.1371/journal.ppat.1002304.

Nellis DW, Ehle CP (1977) Observations on the behaviour of *Brachyphyllum cavernarum* (Chiroptera) in Virgin Islands. *Mammalia* 41: 403-409.

Néri F (2006) Diagnostic sur la mortalité des chauves-souris pars collisions, dans le Lot, sur l'A20 entre Cahors nord et la Dordogne, et propositions d'aménagements. *Symbioses, Bulletin des Muséums d'Histoire Naturelle de la Région Centre, Nouvelle Série* 15: 35-38.

Ogilvie P, Ogilvie M (1964) Observations of a roost of yellow or giant fruit-eating bats, *Eidolon helvum*. *Journal of Mammalogy* 45: 309–310.

Osborne JC, Rupprecht CE, Olson JG, Ksiazek TG, Rollin PE, Niezgoda M, Goldsmith CS, An US, Nichol ST (2003) Isolation of Kaeng Khoi virus from dead *Chaerephon plicata* bats in Cambodia. *Journal of General Virology* 84: 2685–2689.

Osborn RG, Higgins KF, Dieter CD, Usgaard RE (1996) Bat collisions with wind turbines in southwestern Minnesota. *Bat Research News* 37: 105-108.

O'Shea TJ, Vaughan TA (1977) Nocturnal and seasonal activities of the pallid bat, *Antrozous pallidus*. *Journal of Mammalogy* 58: 269-284.

O'Shea TJ, Clark DR Jr (2002) An overview of contaminants and bats, with special reference to insecticides and the Indiana bat. In: Kurta A, Kennedy J (eds) *The Indiana Bat: Biology and*

*Management of an Endangered Species*, 237-253. Bat Conservation International, Austin, Texas, USA.

Perkins M (1985) The plight of *Plecotus*. *Bats* 2. Available at <http://www.batcon.org/index.php/media-and-info/bats-archives.html?task=viewArticle&magArticleID=223>

Péron G, Hines JE, Nichols JD, Kendall WL, Peters KA, Mizrahi DS (2013) Estimation of bird and bat mortality at wind-power farms with superpopulation models. *Journal of Applied Ecology* 50: 902–911.

Perry AE, Rogers G (1964) Predation by great horned owl (*Bubo virginianus*) on young Mexican free tailed bats (*Tadarida brasiliensis mexicana*) in Major County, Oklahoma. *Southwestern Naturalist* 9: 205.

Petri I, Munilla A (2002) Gurelur calcula que miles de aves caen en parques eólicos navarros. *Quercus* 197: 50-51

Pewez, CSD Ingenieurs Conseils, 2013, Southern Belgium.

Phillips GL (1966) Ecology of the big brown bat (Chiroptera: Vespertilionidae) in Northeastern Kansas. *American Midland Naturalist* 75: 168-198.

Pierson ED (1984) Can Australia's Flying Foxes Survive? *Bats* 1. Available at <http://www.batcon.org/index.php/media-and-info/bats-archives.html?task=viewArticle&magArticleID=211>.

Pierson EP, Rainey WE (1992) The biology of flying foxes of the genus *Pteropus*: a review. In: Wilson DE, Graham GL (eds) *Pacific Flying Foxes - Proceedings of an International Conservation Conference*, 1-17. U.S. Fish and Wildlife Service Biological Report 90, Washington DC.

Pierson EP, Elmqvist T, Rainey WE, Cox PA (1996a) Effects of tropical cyclonic storms on flying fox populations on the South Pacific Islands of Samoa. *Conservation Biology* 10: 438-451.

Pierson JE, Donahue P (1983) Peregrine falcon feeding on bats in Suriname, South America. *American Birds* 37: 257-259.

Piorkowski MD (2006) *Breeding Bird Habitat Use and Turbine Collisions of Birds and Bats Located at a Wind Farm in Oklahoma Mixed-Grass Prairie*. Thesis, Oklahoma State University, Stillwater, Oklahoma, USA. [http://www.batsandwind.org/pdf/Piorkowski\\_2006.pdf](http://www.batsandwind.org/pdf/Piorkowski_2006.pdf) Accessed 6 December 2014

Piorkowski MD, O'Connell TJ (2010) Spatial pattern of summer bat mortality from collisions with wind turbines in mixed-grass prairie. *American Midland Naturalist* 164: 260-269.

Poulton V, Erickson W (2010) *Post-construction bat and bird fatality study, Judith Gap Wind Farm, Wheatland County, Montana*. Final report prepared for Judith Gap Energy L.L.C., Western Ecosystems Technology, Cheyenne, WY., USA. Available at <http://www.batsandwind.org/pdf/Judith%20Gap%20Mar2010.pdf> Accessed 7 December 2014

Procesl (2012) *Monitorização de Quirópteros do Parque Eólico de Alvaídzere*. Relatório Anual (Ano 1 da Fase de Exploração - 2011).

Pybus MJ, Hobson DP, Onderka DK (1986) Mass mortality of bats due to probable blue-green algal toxicity. *Journal of Wildlife Diseases* 22: 449-450.

Qureshi I (2015) Indians wilt under heatwave in Telangana state. *BBC News* 25 May 2015. Available at: <http://www.bbc.com/news/world-asia-india-32876148> Accessed 16 December 2015.

Quetglas J, Gonzalez F, Paz O (2003) Estudian la extraña mortandad de miles de murciélago de cuevas. *Quercus* 203: 50.

Racey PA (1979) Two Bats in the Seychelles. *Oryx* 15: 148-152.

Rakotonandrasana EN, Goodman SG (2007) Bat inventories of the Madagascar offshore islands of Nosy Be, Nosy Komba and Ile Sainte-Marie. *African Bat Conservation News* 12: 6-10.

Rakotoarivelo AR, Randrianandrianina FH (2007) A chiropteran survey of the Lac Kinkony-Mahavavy area in western Madagascar. *African Bat Conservation News* 12: 2-5.

Randrianandrianina FH, Racey PA, Jenkins RKB (2010) Hunting and consumption of mammals and birds by people in urban areas of western Madagascar. *Oryx* 44: 411-415.

Ratcliffe F (1932) Notes on the fruit bats (*Pteropus* spp.) of Australia. *Journal of Animal Ecology* 1: 32-57.

Raun GG (1960) A mass die-off of the Mexican brown bat, *Myotis velifer*, in Texas. *Southwestern Naturalist* 5: 104-105.

Reidinger RF Jr, Cockrum EL (1978) Organochlorine residues in free-tailed bats (*Tadarida brasiliensis*) at Eagle Creek Cave, Greenlee County, Arizona. In: Olembo RJ, Castilino JB, Mutere FA (eds), *Proceedings of the Fourth International Bat Research Conference*, 85-96. Kenya Literature Bureau, Nairobi, Kenya.

Rice DW (1957) Life history and ecology of *Myotis austroriparius* in Florida. *Journal of Mammalogy* 38: 15-32.

Richardson P (1996) Bats in the Solomon Islands. *Bat News* 41: 4–5.

Richter AR, Humphrey SR, Cope JB, Brack VJr (1993) Modified cave entrances: thermal effect on body mass and resulting decline of endangered Indiana bats (*Myotis sodalis*). *Conservation Biology* 7: 407-415.

Rico P, Lagrange H (2012) *Chirotech; Bilan des Tests d'Asservissement sur le Parc du Mas de Leuze (Commune de Saint Martin de Crau-13) - 2011*. BIOTOPE, 22 bv du maréchal Foch, 34140 Mèze N°contrat : 08, ADEME. France. Unpublished Report. Available at <http://www.eolien-biodiversite.com/uploaded/fichier/Rapport%20Mas%20de%20Leuze%202011.pdf> Accessed 7 January 2015

Riley J (2002) The rediscovery of Talaud Islands flying fox, *Acerodon humilis* Andersen 1909, and notes on other fruit bats from the Sangihe and Talaud Islands, Indonesia (Mammalia: Chiroptera: Pteropodidae). *Faunistische Abhandlungen* 22: 393-410.

Rodrigues L, Bach L, Dubourg-Savage MJ, Karapandža B, Kovač D, Kervyn T et al. (2014) Draft Guidelines for consideration of bats in wind farm projects – revision 2014. EUROBATS Publication Series UNEP/EUROBATS Secretariat, Bonn, Germany. Available at [http://www.eurobats.org/sites/default/files/documents/pdf/Meeting\\_of\\_Parties/Doc.MoP7\\_13.Annex\\_incl\\_annexes\\_0.pdf](http://www.eurobats.org/sites/default/files/documents/pdf/Meeting_of_Parties/Doc.MoP7_13.Annex_incl_annexes_0.pdf) Accessed 26 December 2014.

Rodrigues L, Bach L, Dubourg-Savage MJ, Goodwin J, Harbusch C, Karapandža K et al. (2008) Guidelines for consideration of bats in wind farm projects. EUROBATS Publication Series UNEP/EUROBATS Secretariat, Bonn, Germany. Available at [http://www.batcon.org/pdfs/wind/Eurobats%202008\\_Guidelines%20for%20Consideration%20of%20Bats%20in%20Wind%20Farm%20Projects.pdf](http://www.batcon.org/pdfs/wind/Eurobats%202008_Guidelines%20for%20Consideration%20of%20Bats%20in%20Wind%20Farm%20Projects.pdf) Accessed 7 January 2015

Rodríguez-Durán A (2009) Bat assemblages in the West Indies: the role of caves. In: Fleming TH, Racey PA (eds) *Island bats. Evolution, Ecology, and Conservation*, 265-280. University of Chicago Press, Chicago, Illinois, USA.

Rodríguez-Durán A (1996) Foraging ecology of the Puerto Rican boa (*Epicrates inornatus*): bat predation, carrion feeding, and piracy. *Journal of Herpetology* 30: 533-536.

Rodríguez-Durán A, Lewis AR (1985) Seasonal predation by merlins on sooty mustached bats in western Puerto Rico. *Biotropica* 17: 71-74.

Rodríguez-Durán A, Pérez J, Montalbán MA, Sandoval JM (2010) Predation by free-roaming cats on an insular population of bats. *Acta Chiropterologica* 12: 359-362.

Roer H (1981) Zur heimkehrfähigkeit der zwegfledermaus (*Pipistrellus pipistrellus* Schreber, 1774) (Mammalia: Chiroptera). *Bonner Zoologische Beiträge* 32: 13-30.



- Roer H (1980) 1180 Zwegfledermause (*Pipistrellus pipistrellus* Schreber) in entlüftungsrohren eines Gebäudes verend. *Myotis* 17: 31-40.
- Roué SY, Némoz M (2002) Mortalité exceptionnelle du minioptère de Schreibers en France lors de l'année 2002. Société Française pour l'Étude et la Protection des Mammifères. Muséum d'Histoire Naturelle - Les Rives d'Auron, 18000 Bourges, France.
- Russell AL, Butchkoski CM, Saidak L, McCracken GF (2009) Road-killed bats, highway design, and the commuting ecology of bats. *Endangered Species Research* 8: 49–60.
- Rydell J, Bach L, Dubourg-Savage MJ, Green M, Rodrigues L, Hedenstrom A (2010) Bat mortality at wind turbines in northwestern Europe. *Acta Chiropterologica* 12: 261-274.
- Rysgaard GN (1941) Bats killed by severe storm. *Journal of Mammalogy* 22: 452-453.
- Rysgaard GN (1942) A study of the cave bats of Minnesota with especial reference to the large brown bat, *Eptesicus fuscus fuscus* (Beauvois). *American Midland Naturalist* 28: 245-267.
- Santos H, Rodrigues L, Jones G, Rebelo H (2013) Using species distribution modelling to predict bat fatality risk at wind farms. *Biological Conservation* 157: 178–186.
- Saunders L (2014) Extreme heat event devastates Qld native Flying-fox colonies. Media Release 6 January, Bat Conservation and Rescue Qld, Inc. <http://bats.org.au/uploads/news-events/media/press-releases/Heatdisastermr6012014.pdf>. Accessed 26 January 2014
- Scheffers BR, Corlett RT, Diesmos A, Laurance WF (2012) Local demand drives a bushmeat industry in a Philippine forest preserve. *Tropical Conservation Science* 5: 133-141.
- Schmidt U (1970) Control de murcielago hematofogo. *Resumenes de la Septima Reunion Anual de Instituto Nacional Investigacions Pecuaris, Palo Alto, Mexico*, p. 24.
- Scrimgeour J, Beath A, Swanney M (2012) Cat predation of short-tailed bats (*Mystacina tuberculata rhyocobia*) in Rangataua Forest, Mount Ruapehu, Central North Island, New Zealand. *New Zealand Journal of Zoology* 39: 257-260.
- Seiche K, Endl P, Lein M (2008) *Fledermäuse und Windenergieanlagen in Sachsen 2006*. Sächsisches Landesamt für Umwelt und Geologie. Available at: <https://www.igwindkraft.at/mmedia/download/2008.03.12/1205329233.pdf> Downloaded 23 February 2015.
- Seiche K, Endl P, Lein M (2007) Fledermäuse und Windenergieanlagen in Sachsen – Ergebnisse einer landesweiten Studie. *Nyctalus (N.F.)* 12: 170-181.
- Sick H (1961) Peregrine falcon hunting bats while wintering in Brazil. *Auk* 78:646-648

- Sidner RM (1997) *Studies of Bats in Southeastern Arizona with Emphasis on Aspects of Life History of *Antrozous pallidus* and *Eptesicus fuscus**. PhD dissertation, University of Arizona, Tucson, Arizona, USA.
- Silva B, Barreiro S, Hortêncio M, Alves P (2008) Parque Eólico do Caramulo: Monitorização de Quirópteros. Relatório 3 – Ano 2007. Plecotus, Ld.
- Silva Taboada G (1979) *Los Murciélagos de Cuba*. Academia de Ciencias de Cuba, Habana, Cuba.
- Speakman JR (1991) The impact of predation by birds on bat populations in the British Isles. *Mammal Review* 21: 123–142.
- Spennemann DHR, Wiles GJ (2002) An historical attempt to control flying foxes in Samoa with an introduced disease. *Australian Mammalogy* 23: 177-179.
- Sprunt A Jr (1951) Aerial feeding of duck hawk, *Falco p. anatum*. *Auk* 68:372-373
- Stager KE (1941) A group of bat-eating duck hawks. *Condor* 43: 137-139.
- Stair JB (1887) *Old Samoa, or Flotsam and Jetsam from the Pacific Ocean*. Southern Reprints, Papakura, New Zealand.
- Stantec Consulting (2012) *Wolfe Island Wind Plant Post-Construction Follow-Up Plan Bird and Bat Resources, Monitoring Report No. 6, July–December 2011*. Unpublished report prepared for TransAlta Corporation wholly owned subsidiary of Canadian Renewable Energy Corporation. Prepared by Stantec Consulting, Ltd., Guelph, ON. Available at [http://www.batsandwind.org/pdf/Stantec\\_2012\\_Wolfe\\_Island\\_Monitoring\\_Report\\_July-Dec\\_2011\\_REPORT\\_6.pdf](http://www.batsandwind.org/pdf/Stantec_2012_Wolfe_Island_Monitoring_Report_July-Dec_2011_REPORT_6.pdf) Accessed 10 December 2014
- Stantec Consulting (2011a) *Cohocton and Dutch Hill Wind Farms Year 2 Post-Construction Monitoring Report, 2010 for the Cohocton and Dutch Hill Wind Farms in Cohocton, New York*. Prepared for Canandaigua Power Partners, LLC and Canandaigua Power Partners II, LLC, Portland, Maine, USA. Available at <http://www.batsandwind.org/pdf/Cohocton,%20NY%20Post%20Construction%202010.pdf> Accessed 9 December 2014
- Stantec Consulting (2011b) *Wolfe Island Wind Plant Post-Construction Follow-Up Plan Bird and Bat Resources, Monitoring Report No. 3, January–June 2010*. Unpublished report prepared for TransAlta Corporation wholly owned subsidiary of Canadian Renewable Energy Corporation. Prepared by Stantec Consulting, Ltd., Guelph, ON. Available at [http://www.batsandwind.org/pdf/Wolfe%20Island%203\\_Bird%20and%20Bat%20Monitoring.pdf](http://www.batsandwind.org/pdf/Wolfe%20Island%203_Bird%20and%20Bat%20Monitoring.pdf) Accessed 9 December 2014
- Stantec Consulting (2011c) *Wolfe Island Wind Plant Post-Construction Follow-Up Plan Bird and Bat Resources, Monitoring Report No. 4, July–December 2010*. Unpublished report prepared

for TransAlta Corporation wholly owned subsidiary of Canadian Renewable Energy Corporation. Prepared by Stantec Consulting, Ltd., Guelph, ON. Available at [http://www.batsandwind.org/pdf/Wolfe%20Island%204\\_Bird%20and%20Bat%20Monitoring.pdf](http://www.batsandwind.org/pdf/Wolfe%20Island%204_Bird%20and%20Bat%20Monitoring.pdf) Accessed 9 December 2014

Stantec Consulting (2011d) *Wolfe Island Wind Plant Post-Construction Follow-Up Plan Bird and Bat Resources, Monitoring Report No. 5, January–June 2011*. Unpublished report prepared for TransAlta Corporation wholly owned subsidiary of Canadian Renewable Energy Corporation. Prepared by Stantec Consulting, Ltd., Guelph, ON. Available at [http://www.batsandwind.org/pdf/Wolfe%20Island%205\\_Bird%20and%20Bat%20Monitoring.pdf](http://www.batsandwind.org/pdf/Wolfe%20Island%205_Bird%20and%20Bat%20Monitoring.pdf) Accessed 10 December 2014

Stantec Consulting (2010a) *Wolfe Island Ecopower Centre Post-Construction Followup Plan. Bird and Bat Resources Monitoring Report No. 1: May - June 2009*. File No. 160960494. Prepared for Canadian Hydro Developers, Inc.'s wholly owned subsidiary, Canadian Renewable Energy Corporation. Prepared by Stantec Ltd., Guelph, Ontario. February 2010. Available at [http://www.batsandwind.org/pdf/Wolfe%20Island%201\\_Bird%20and%20Bat%20Monitoring.pdf](http://www.batsandwind.org/pdf/Wolfe%20Island%201_Bird%20and%20Bat%20Monitoring.pdf) Accessed 8 December 2014

Stantec Consulting (2010b) *Wolfe Island Ecopower Centre Post-Construction Followup Plan. Bird and Bat Resources Monitoring Report No. 2: July - December 2009*. File No. 160960494. Prepared for TransAlta Corporation's wholly owned subsidiary, Canadian Renewable Energy Corporation. Prepared by Stantec Ltd., Guelph, Ontario. May 2010. Available at <http://www.batsandwind.org/pdf/Wolfe%20Island-bird-monitoring-report-2h2009.pdf> Accessed 8 December 2014

Stantec Consulting (2009a) *Stetson I Mountain Wind Project. Year 1 Post-Construction Monitoring Report, 2009 for the Stetson Mountain Wind Project in Penobscot and Washington Counties, Maine*. Prepared for First Wind Management, LLC. Portland, Maine. Prepared by Stantec, Topsham, Maine, USA. January 2009. Available at <http://www.batsandwind.org/pdf/Stetson%20I,%20ME%20Post%20Construction%202009.pdf> Accessed 8 December 2014

Stantec Consulting (2009b) *Post-Construction Monitoring at the Munnsville Wind Farm, New York: 2008*. Prepared for EON Climate and Renewables, Austin, Texas. Prepared by Stantec Consulting, Topsham, Maine. January 2009. Available at <http://www.batsandwind.org/pdf/Munnsville%20post-constux%20report%20031109%20Final.pdf> Accessed 8 December 2014

Stantec Consulting (2008a) *2007 Spring, Summer, and Fall Post-Construction Bird and Bat Mortality Study at the Mars Hill Wind Farm, Maine*. Prepared for UPC Wind Management, LLC, Cumberland, Maine, by Stantec Consulting, formerly Woodlot Alternatives, Inc., Topsham, Maine, USA. January, 2008. Available at <http://www.batsandwind.org/pdf/Mars%20Hill,%20ME%20Post%20Construction%202007.pdf> Accessed 8 December 2014

- Stebbings, B (1987) Bats, tequila, and the King of Siam. *BBC Wildlife* January: 4-8.
- Stebbings RE (1971) Bats, their life and conservation. *Quarterly Journal Devon Trust for Nature Conservation*. March 29-36.
- Stebbings RE (1988) *Conservation of European bats*. Christopher Helm Publishers, London.
- Stebbings RE, Arnold HR (1987) Assessment of trends in size and structure of a colony of the greater horseshoe bat. *Symposia of the Zoological Society of London* 58: 7-24.
- Stebbings RE, Griffith F (1986) *Distribution and Status of Bats in Europe*. Institute of Terrestrial Ecology, Monks Wood Experimental Station, Abbots Ripton, Huntingdon, UK.
- Struebig MJ, Harrison ME, Cheyne SM, Limin SH (2007) Intensive hunting of large flying foxes *Pteropus vampyrus natunae* in Central Kalimantan, Indonesian Borneo. *Oryx* 41: 390–393.
- Sutter J, Martínez-A WE, Oliva-T F, Oswaldo-J N, Whitacre DF (2001) Diet and hunting behavior of the crane hawk in Tikal National Park, Guatemala. *Condor* 103: 70-77.
- Taylor J (1964) Noteworthy predation on the guano bat. *Journal of Mammalogy* 45: 300-301.
- Tench, W. 1793. *A Complete Account of the Settlement at Port Jackson*. Nicol and Sewell, London, UK
- Thogmartin WE, King RA, Szymanski JA, Pruitt L (2012) Space-time models for a panzootic in bats, with a focus on the endangered Indiana bat. *Journal of Wildlife Diseases* 48: 876–887.
- Thogmartin WE, Sanders-Reed CA, Szymanski JA, McKann PC, Pruitt L, King RA, Runge MC, Russell RE (2013) White-nose syndrome is likely to extirpate the endangered Indiana bat over large parts of its range. *Biological Conservation* 160: 162–172.
- Thompson J, Bay K (2012) *Post-Construction Fatality Surveys for the Dry Lake II Wind Project Iberdrola Renewables, LLC February 2011 – February 2012*. Available at [ftp://50-201-198-131-static.hfc.comcastbusiness.net/DesertSun/Thompson%20and%20Bay\\_Dry%20Lake%20II%20Fatality%20Surveys%202011-2012\\_WEST%202012.pdf](ftp://50-201-198-131-static.hfc.comcastbusiness.net/DesertSun/Thompson%20and%20Bay_Dry%20Lake%20II%20Fatality%20Surveys%202011-2012_WEST%202012.pdf) Accessed 21 December 2014
- Tidemann CR (1999) Biology and management of the grey-headed flying-fox, *Pteropus poliocephalus*. *Acta Chiropterologica* 1: 151-164.
- Tidemann CR, Nelson JE (2011) Life expectancy, causes of death and movements of the grey-headed flying-fox (*Pteropus poliocephalus*) inferred from banding. *Acta Chiropterologica* 13: 419-429.

Tidhar D, Sonnenberg M, Young D (2013) *DRAFT 2012 Post-Construction Fatality Monitoring Study for the Beech Ridge Wind Farm, Greenbrier County, West Virginia*. Final Report: April 1 – October 28, 2012. Prepared for Beech Ridge Wind Farm, Beech Ridge Energy, LLC, Chicago, Illinois. Prepared by Western EcoSystems Technology, Inc., NE/Mid-Atlantic Branch, Waterbury, Vermont. Available at [http://www.batsandwind.org/pdf/Tidhar%20et%20al.%202013.%20Beech%20Ridge%202012%20Post-construction%20Monitoring%20Final%20Report\\_1\\_18\\_13.pdf](http://www.batsandwind.org/pdf/Tidhar%20et%20al.%202013.%20Beech%20Ridge%202012%20Post-construction%20Monitoring%20Final%20Report_1_18_13.pdf) Accessed 10 December 2014

Trapp H, Fabian D, Förster F, Zinke O (2002) Fledermausverluste in einem Windpark der Oberlausitz. *Naturschutzarbeit in Sachsen* 44: 53-56. Available at <https://publikationen.sachsen.de/bdb/artikel/11611>

Traxler A, Wegleitner S, Jaklitsch H (2004) *Vogelschlag, Meideverhalten & Habitatnutzung an bestehenden Windkraftanlagen Prellenkirchen – Obersdorf – Steinberg/Prinzendorf*. Unpublished report for WWS Ökoenergie, EVN Naturkraft, WEB Windenergie, IG Windkraft und Amt der Niederösterreichischen Landesregierung. Available at <https://www.igwindkraft.at/mmedia/download/2005.04.15/1113566866.pdf> Accessed 5 January 2015.

TRC Environmental Corporation (2008) *Post-Construction Avian and Bat Fatality Monitoring and Grassland Bird Displacement Surveys at the Judith Gap Wind Energy Project, Wheatland County, Montana*. Prepared for Judith Gap Energy, LLC Chicago, Illinois. 32 p. + appendices. Available at: <http://docs.wind-watch.org/AvianBatFatalityMonitoring-JudithGapMT.pdf> Accessed 21 June 2015.

Trille M, Liozon R, Talhoët, S (2008). *Suivi Ornithologique et Chiroptérologique du Parc Éolien de Castelnau-Pégayrols. Bilan de la Première Année de Suivi*. LPO Aveyron, unpublished report.

Turner GG, Reeder DM, Coleman JTH (2011) A five-year assessment of mortality and geographic spread of white-nose syndrome in North American bats and a look to the future. *Bat Research News* 52: 13-27.

Tuttle MD (1979) Status, causes of decline, and management of endangered gray bats. *Journal of Wildlife Management* 43: 1-17.

Tuttle MD (1985) Joint effort saves vital bat cave. *Bats* 2: 3-4.

Tuttle M (1990) Return to Thailand. *Bats* 8. Available at <http://www.batcon.org/index.php/media-and-info/bats-archives.html?task=viewArticle&magArticleID=461>.

Tuttle MD (1993a) Crisis for America's bats. *Bats* 11. Available at <http://www.batcon.org/index.php/media-and-info/bats-archives.html?task=viewArticle&magArticleID=596>

Twente JW Jr (1954) Predation on bats by hawks and owls. *Wilson Bulletin* 66: 135-136.

Twente JW Jr (1955) Aspects of a population study of cavern-dwelling bats. *Journal of Mammalogy* 36: 379-390.

U.S. Fish and Wildlife Service (2007) *Indiana Bat (Myotis sodalis) Draft Recovery Plan: First Revision*. U.S. Fish and Wildlife Service, Fort Snelling, Minnesota. Available at <http://endangered.fws.gov>. Accessed 29 January 2014.

U.S. Geological Survey (2015a) National Wildlife Health Center. Wildlife health information sharing partnership event reporting system. Available at: <http://www.nwhc.usgs.gov/whispers/>

U.S. Geological Survey (2015b) National Wildlife Health Center. New and ongoing wildlife mortality events nationwide. Available at:

[http://www.nwhc.usgs.gov/mortality\\_events/ongoing.jsp](http://www.nwhc.usgs.gov/mortality_events/ongoing.jsp) Accessed 20 May 2015

U.S. Geological Survey (2015c) National Wildlife Health Center. Quarterly wildlife mortality reports. Available at: [http://www.nwhc.usgs.gov/publications/quarterly\\_reports/index.jsp](http://www.nwhc.usgs.gov/publications/quarterly_reports/index.jsp) Accessed 20 May 2015

Vargas J, Landaeta A C, Simonetti, JA (2002) Bats as prey of barn owls (*Tyto alba*) in a tropical savanna in Bolivia. *Journal of Raptor Research* 36: 146-148.

Van Tassel T (1995) To Save the Spectacled Flying Fox. *Bats* 13: 13-15.

Vardon MJ, Tidemann CR (1995) Harvesting of flying-foxes (*Pteropus* spp.) in Australia: Could it promote the conservation of endangered Pacific Island species. In: Grigg G, Hale P, Lunney D (eds) *Conservation Through the Sustainable Use of Wildlife*, 82-85. University of Queensland, Brisbane, Australia.

Verschuren J (1985) Note sur les mammifères des Seychelles. Une facteur de mortalité de la rousette endémique, *Pteropus seychellensis*. *Mammalia* 49: 424-426.

Vincenot CE, Koyama L, Russo D (2015) Near threatened? First report of unsuspected human-driven decline factors in the Ryukyu flying fox (*Pteropus dasymallus*) in Japan. *Mammalian Biology* 80: 273-277.

Villa R., B. 1955. Una extrana mortandad de murcielagos *Mormoops megalophylla* en el norte de Mexico. *Anales del instituto Biologia Universidad Nacional Autonoma de Mexico*, 26: 547-552.

Voûte AM (1980) The Pond bat (*Myotis dasycneme* Boie, 1825) an endangered bat species in northwestern Europe. In: Wilson DE, Gardner AL (eds) *Proceedings of the Fifth International Bat Research Conference*, 185-192. Texas Tech Press, Lubbock, Texas, USA.

Voûte AM (1981) The conflict between bats and wood preservatives. *Myotis* 18/19: 11-14.

Wade D (2012) Meet James. *Bat Chatter, Bat Conservation and Rescue Queensland*. 20: 9.

Welbergen JA, Klose SM, Markus N, Eby P (2008) Climate change and the effects of temperature extremes on Australian flying-foxes. *Proceedings of the Royal Society B* 275: 419–425.

West C (2002) Contemporary issues in managing flying-fox camps: a publicly-documented conflict from Maclean on the north coast of NSW. In: Eby P, Lunney D (eds) *Managing the Grey-Headed Flying-Fox as a Threatened Species in NSW*, 176-195. Royal Zoological Society of New South Wales, Southwood Press, Marrickville, New South Wales, Australia

Whitaker JO Jr, Hamilton WJ Jr (1998) *Mammals of the Eastern United States*. Cornell University Press, Ithaca, New York, USA

White CM, Brimm DJ, Clunie F (1988) A study of peregrines in the Fiji Islands, South Pacific Ocean. In: Cade TJ, Enderson JH, Thelander CG, White CM (eds) *Peregrine Falcon Populations--Their Management and Recovery*, 275-287. The Peregrine Fund, Incorporated, Boise, Idaho, USA.

Wilder AP, Frick WF, Langwig KE, Kunz TH (2011) Risk factors associated with mortality from white-nose syndrome among hibernating bat colonies. *Biology Letters* 7:950-953.

Wiles GJ, Brooke AP (2009) Conservation threats to bats in the tropical Pacific Islands and insular Southeast Asia. In: Fleming TH, Racey PA (eds) *Island Bats. Evolution, Ecology, and Conservation*, 405-459. University of Chicago Press, Chicago, Illinois, USA.

Woods M, McDonald RA, Harris S (2003) Predation of wildlife by domestic cats *Felis catus* in Great Britain. *Mammal Review* 33: 174–178.

Young D, Nations C, Lout M, Bay K. 2013. *2012 Post-Construction Monitoring Study Criterion Wind Project, Garrett County, Maryland, April–November 2012*. Unpublished report prepared for Criterion Power Partners, LLC, Oakland, MD. Prepared by WEST, Inc., Cheyenne, WY. Available at

<http://www.batsandwind.org/pdf/Young%20et%20al%20%202013%20Criterion%20Monitoring%20Report.pdf> Accessed 11 December 2014

Young D, Lout M, Courage Z, Nomani S, Bay K (2012a) 2011 Post-Construction Monitoring Study Criterion Wind Project Garrett County, Maryland, April 2011-November 2011. Technical report prepared for: Criterion Power Partners, LLC, Oakland, Maryland. Prepared by: Western EcoSystems Technology, Inc., Cheyenne, Wyoming and Waterbury, Vermont. Available at

[http://www.exeloncorp.com/assets/energy/powerplants/docs/Criterion/PPP%20Post%20Construction%20Monitoring%20Report%20\(042512\).pdf](http://www.exeloncorp.com/assets/energy/powerplants/docs/Criterion/PPP%20Post%20Construction%20Monitoring%20Report%20(042512).pdf) Accessed 11 December 2014

Young D, Nomani S, Courage Z, Bay K (2012b) *Nedpower Mount Storm Wind Energy Facility Post-Construction Avian and Bat Monitoring, July–October 2011*. Unpublished report prepared for NedPower Mount Storm, LLC, Houston, TX. Prepared by WEST, Inc., Cheyenne, WY. Available at [http://www.batsandwind.org/pdf/Young%20et%20al%20%202012%20-%20Mount%20Storm%20Fall%202011%20Report%20\(022712\).pdf](http://www.batsandwind.org/pdf/Young%20et%20al%20%202012%20-%20Mount%20Storm%20Fall%202011%20Report%20(022712).pdf) Accessed 11 December 2014

Young DP Jr, Nomani S, Tidhar WL, Bay K (2011a) *Nedpower Mount Storm Wind Energy Facility Post-Construction Avian and Bat Monitoring, July–October 2010*. Unpublished report prepared for NedPower Mount Storm, LLC, Houston, Texas. Prepared by Western EcoSystems Technology, Inc., Cheyenne, WY, USA. Available at [http://www.batsandwind.org/pdf/WV%20-%20Young%20et%20al.%202011%20-%20Mount%20Storm%20Fall%202010%20Report\(202-10-11\).pdf](http://www.batsandwind.org/pdf/WV%20-%20Young%20et%20al.%202011%20-%20Mount%20Storm%20Fall%202010%20Report(202-10-11).pdf) Accessed 11 December 2014

Young, D. P. Jr., S. Nomani, Z. Courage, and K. Bay. (2011b) *Nedpower Mount Storm Wind Energy Facility Post-Construction Avian and Bat Monitoring, April-July 2011*. Unpublished report prepared for NedPower Mount Storm, LLC, Houston, Texas. Prepared by Western EcoSystems Technology, Inc., Cheyenne, WY, USA. Available at <http://www.psc.state.wv.us/scripts/WebDocket/ViewDocument.cfm?CaseActivityID=328315&NotType='WebDocket'> Accessed 21 December 2014

Young DP Jr, Erickson WP, Bay K, Nomani S, Tidbar W (2009) *Mount Storm Wind Energy Facility, Phase 1 Post-Construction Avian and Bat Monitoring*. Report prepared for NedPower Mount Storm LLC. Western Ecosystems Technology, Inc., Cheyenne, Wyoming, USA. Available at <http://www.batsandwind.org/pdf/Mt.%20Storm%20Post-construction%202008.pdf> Accessed 10 December 2014

Young DP Jr, Erickson WP, Jeffrey J, Poulton VK (2007) *Puget Sound Energy Hopkins Ridge Wind Project Phase 1 Post-Construction Avian and Bat Monitoring First Annual Report, January - December 2006*. Technical report for Puget Sound Energy, Dayton, Washington and Hopkins Ridge Wind Project Technical Advisory Committee, Columbia County, Washington. Western EcoSystems Technology, Inc., Cheyenne, Wyoming, and Walla Walla, Washington, USA. 25 pp. Available at: <http://wind.nrel.gov/public/library/young9.pdf> Accessed 21 December 2014.

Young DP Jr, Jeffrey J, Erickson WP, Bay K, Poulton VK (2006) *Eurus Combine Hills Turbine Ranch. Phase 1 Post Construction Wildlife Monitoring First Annual Report*. Technical report prepared for Eurus Energy America Corporation, San Diego, California, and the Combine Hills Technical Advisory Committee, Umatilla County, Oregon. Prepared by Western EcoSystems Technology, Inc., Cheyenne, Wyoming, and Northwest Wildlife



Consultants, Inc., Pendleton, Oregon, USA. Available at <http://wind.nrel.gov/public/library/young7.pdf> Accessed 21 December 2014

Young DP Jr, Erickson WP, Good RE, Strickland MD, Johnson GD (2003) *Avian and Bat Mortality Associated with the Initial Phase of the Foote Creek Rim Windpower Project, Carbon County, Wyoming: November 1998–June 2003*. Technical Report prepared for Pacificorp, Inc., SeaWest Windpower, Inc., and Bureau of Land Management. Western Ecosystems Technology, Inc., Cheyenne, Wyoming, USA. Available at <http://www.batsandwind.org/pdf/avian%20and%20bat%20mortality%20foote%20creek.pdf> Accessed 21 November 2014.

Zimmerman FR (1937) Migration of little brown bats. *Journal of Mammalogy* 17: 363.
